# Supplementary material for: bin3C: exploiting Hi-C sequencing data to accurately resolve metagenome-assembled genomes
Source: Genome Biol. 2019 Feb 26;20:46. doi: 10.1186/s13059-019-1643-1 (PMC6391755; doi:10.1186/s13059-019-1643-1)
Supplement: Supplementary file 4 — Real community bin3C and CheckM report. The cluster report produced by bin3C joined with the CheckM validation result for the real human gut microbiome. (CSV 810 kB) [file 13059_2019_1643_MOESM4_ESM.csv]

name	id	size	extent	gc_expect	gc_mean	gc_median	gc_std	cov_expect	cov_mean	cov_median	cov_std	Marker lineage	# genomes	# markers	# marker sets	0	1	2	3	4	5+	Completeness	Contamination	Strain heterogeneity
CL0038	37	57	2810566	55.179668436891355	54.65084780947282	54.92162094555157	2.579517821448023	40.87490129345015	63.35114705263158	41.342898999999996	80.74028553980422	p__Proteobacteria (UID3887)	1487.0	256.0	161.0	0.0	251.0	5.0	0.0	0.0	0.0	100.0	1.86	0.0
CL0060	59	85	2418508	60.02845556020489	60.48334528598625	60.640013529919855	4.598930648486143	196.2802779487105	326.41841079999995	180.169973	728.4001502990621	p__Actinobacteria (UID2112)	31.0	211.0	124.0	0.0	210.0	1.0	0.0	0.0	0.0	100.0	0.81	0.0
CL0080	79	50	1940600	60.23415438524168	60.20066157916997	60.84348215042435	2.7418613916646697	10.69392775497011	11.946304539999998	10.564753	10.798783757385461	p__Actinobacteria (UID2112)	31.0	211.0	124.0	0.0	211.0	0.0	0.0	0.0	0.0	100.0	0.0	0.0
CL0068	67	60	2236903	57.644073077822334	57.824429762399504	57.80161159560574	3.8605632472181246	11.698838681969672	18.3577585	11.9455855	29.09759693536305	p__Actinobacteria (UID2112)	31.0	211.0	124.0	0.0	211.0	0.0	0.0	0.0	0.0	100.0	0.0	0.0
CL0032	31	86	2993177	58.595799713815786	53.85877839267659	58.62495048909092	9.255628452620762	25.5995297751847	57.20506852325582	23.3392765	291.37804904091024	p__Bacteroidetes (UID2605)	350.0	314.0	208.0	0.0	309.0	5.0	0.0	0.0	0.0	100.0	1.76	20.0
CL0058	57	55	2439331	62.0873509991059	62.65645863066286	62.850566874094284	2.4868855916155748	15.470920016782065	17.136131745454545	15.275819	9.086415358276902	p__Actinobacteria (UID2112)	31.0	211.0	124.0	1.0	209.0	1.0	0.0	0.0	0.0	99.73	0.81	0.0
CL0072	71	34	2154737	62.822887433593976	62.017609632625934	62.859812536003616	2.401362981813421	57.030635854990656	71.22967297058824	55.524533	69.96862762595605	f__Bifidobacteriaceae (UID1462)	65.0	476.0	217.0	1.0	473.0	2.0	0.0	0.0	0.0	99.54	0.58	100.0
CL0054	53	63	2549586	53.600819897818695	49.78874907104769	51.08695652173913	6.7010917237194185	447.5009906596717	462.79464233333334	412.514241	603.0999036001265	p__Bacteroidetes (UID2605)	350.0	314.0	208.0	1.0	308.0	5.0	0.0	0.0	0.0	99.52	2.4	0.0
CL0017	16	97	3279815	49.02410654259463	46.733138568223964	48.82518796992481	5.599937347216681	47.53339316429554	54.06304231958763	45.557565999999994	50.026547416834184	f__Lachnospiraceae (UID1286)	57.0	420.0	207.0	7.0	401.0	12.0	0.0	0.0	0.0	99.38	1.01	0.0
CL0021	20	78	3092885	43.78028927684023	41.522116948412524	42.71163604474091	4.543280125021176	76.5529742648566	96.65256475641024	74.8735925	78.56207708428904	o__Clostridiales (UID1212)	172.0	263.0	149.0	1.0	255.0	7.0	0.0	0.0	0.0	99.33	2.1	0.0
CL0019	18	91	3274823	57.43376054217281	53.650061083820326	56.01429138547042	5.87191603795677	72.29120060545166	93.94344175824179	74.556584	88.40708465887734	o__Clostridiales (UID1120)	304.0	250.0	143.0	1.0	245.0	4.0	0.0	0.0	0.0	99.3	1.86	0.0
CL0016	15	106	3317491	57.7649494753716	55.335080720410716	57.53399325305654	5.491775432211843	29.016340299765396	32.85725612264152	24.4360055	26.82653959264032	p__Bacteroidetes (UID2605)	350.0	314.0	208.0	18.0	293.0	3.0	0.0	0.0	0.0	99.28	1.44	0.0
CL0043	42	73	2711296	55.17029494382022	54.48341779585654	55.4271542398818	3.995575142749904	7.905578187566019	7.691296191780823	7.726953	1.2580625812441972	p__Bacteroidetes (UID2605)	350.0	314.0	208.0	5.0	309.0	0.0	0.0	0.0	0.0	99.23	0.0	0.0
CL0007	6	142	3834083	42.76761875003749	40.53664073616198	41.59182847003056	4.252554008243782	102.02085750038536	144.00085359859153	100.17003000000001	169.49979575496874	f__Lachnospiraceae (UID1286)	57.0	420.0	207.0	3.0	397.0	20.0	0.0	0.0	0.0	99.21	6.75	5.0
CL0086	85	14	1818946	52.87946975886035	53.14481132825193	53.05517327395607	3.964753061864637	25.66901188996265	31.0979945	23.807283	27.42567295234005	p__Actinobacteria (UID2112)	31.0	211.0	124.0	1.0	209.0	1.0	0.0	0.0	0.0	99.19	0.2	0.0
CL0047	46	66	2629996	40.909073625967494	40.42245545622918	40.995647191519645	3.5479670034795805	20.773977417018887	24.983404696969696	20.531335000000002	15.558803918902061	f__Lachnospiraceae (UID1286)	57.0	420.0	207.0	3.0	412.0	5.0	0.0	0.0	0.0	99.19	1.32	0.0
CL0065	64	78	2318343	59.2584876353499	56.79363488220137	59.18409644376477	5.983012912285828	175.1320478549244	230.07780471794877	161.63634199999998	194.25506730639975	o__Clostridiales (UID1212)	172.0	261.0	147.0	17.0	241.0	3.0	0.0	0.0	0.0	99.0	1.42	66.67
CL0023	22	67	3072994	41.733469053307616	40.475049260218185	41.20814403499916	4.757182432366117	30.42014763995504	43.90638264179105	28.906131	84.0301830651867	o__Clostridiales (UID1212)	172.0	263.0	149.0	4.0	246.0	13.0	0.0	0.0	0.0	98.97	1.3	61.54
CL0050	49	74	2588939	38.17455722208983	38.024029948709796	38.36448044302854	4.3882145286396	188.0374287680127	246.21368406756756	190.01420249999998	265.0338205315544	o__Clostridiales (UID1212)	172.0	263.0	149.0	2.0	260.0	1.0	0.0	0.0	0.0	98.66	0.34	0.0
CL0011	10	275	3353240	55.872618720998204	53.73608422523359	54.4709922025896	5.430190912910329	55.22998270474408	58.0270053490909	52.095959	66.68427038680807	o__Clostridiales (UID1212)	172.0	263.0	149.0	2.0	260.0	1.0	0.0	0.0	0.0	98.66	0.67	0.0
CL0009	8	77	3457722	36.59192381573765	36.423607848904695	36.179024531662	5.2334476219624735	47.99733727627032	66.0125384155844	50.565677	106.40647462520164	o__Clostridiales (UID1212)	172.0	263.0	149.0	3.0	260.0	0.0	0.0	0.0	0.0	98.66	0.0	0.0
CL0062	61	72	2387342	34.40294687564664	34.80571307444879	33.98970565933797	2.611075804845601	13.737247925097869	19.47560556944445	13.1988305	30.44915997924773	o__Clostridiales (UID1212)	172.0	263.0	149.0	2.0	261.0	0.0	0.0	0.0	0.0	98.66	0.0	0.0
CL0028	27	63	3039291	43.18178154049744	41.82509690057889	43.572251778209804	4.634387865523268	10.110748625737383	13.096059920634925	9.774658	19.957081428769946	o__Clostridiales (UID1212)	172.0	263.0	149.0	3.0	252.0	8.0	0.0	0.0	0.0	98.66	0.61	12.5
CL0029	28	47	3034064	37.24249060006645	37.07136812792422	37.062089991017224	4.876191155686397	118.82201874404858	88.57127574468086	105.052453	64.03963024226465	o__Clostridiales (UID1212)	172.0	263.0	149.0	3.0	260.0	0.0	0.0	0.0	0.0	98.66	0.0	0.0
CL0031	30	99	3006985	40.617163038724826	39.24514375126301	40.19604877015702	4.971016546386339	26.317238544599324	34.71671805050505	25.990323999999998	41.408503219375625	o__Clostridiales (UID1212)	172.0	263.0	149.0	3.0	260.0	0.0	0.0	0.0	0.0	98.66	0.0	0.0
CL0003	2	226	4336622	42.40065193599995	40.6440780726129	40.90920358585489	6.203880338559323	165.23878175555305	255.79888085840702	159.638981	304.4508677773534	f__Lachnospiraceae (UID1286)	57.0	420.0	207.0	3.0	394.0	22.0	1.0	0.0	0.0	98.55	7.36	8.0
CL0012	11	294	3352270	54.76205675557161	54.68164788684883	56.00472949459982	4.803449926414656	94.44671870231814	95.21708332312927	83.04666850000002	77.18244938491846	o__Clostridiales (UID1212)	172.0	261.0	147.0	14.0	245.0	2.0	0.0	0.0	0.0	98.38	0.7	0.0
CL0055	54	71	2514056	57.31845273136318	57.98235538866018	60.64161777555861	7.3823143067026225	23.519758254760827	24.714034084507038	16.567898	42.67357788091746	o__Clostridiales (UID1212)	172.0	257.0	149.0	3.0	253.0	1.0	0.0	0.0	0.0	98.32	0.67	0.0
CL0025	24	127	3054485	52.31683900886729	50.64559946683511	52.5608451457609	4.8676494089694105	7.262437926305743	7.92007079527559	6.622126	6.808959207605431	o__Clostridiales (UID1226)	155.0	278.0	158.0	13.0	263.0	2.0	0.0	0.0	0.0	98.3	0.95	0.0
CL0084	83	27	1863635	45.03929149216451	45.657093077729435	46.30032230600827	4.6428469111773625	78.20758389000046	117.89231051851853	80.64242800000001	176.58767440715388	p__Firmicutes (UID1022)	100.0	295.0	158.0	3.0	291.0	1.0	0.0	0.0	0.0	98.1	0.63	0.0
CL0041	40	62	2760511	38.64248322140357	38.04901290407868	38.78941176676623	3.3318588181953825	14.692831603660338	18.541548080645164	14.572718	16.774738356194586	o__Clostridiales (UID1212)	172.0	263.0	149.0	4.0	259.0	0.0	0.0	0.0	0.0	97.99	0.0	0.0
CL0033	32	113	2953665	56.63871833806475	53.42921237334584	54.74343675417661	5.857301189747519	65.12153342088628	98.57028439823007	61.88219300000001	144.34435841456457	o__Clostridiales (UID1212)	172.0	263.0	149.0	3.0	260.0	0.0	0.0	0.0	0.0	97.99	0.0	0.0
CL0024	23	57	3071937	37.71213407045782	36.19308784733319	36.969796996203996	3.4999154873375486	19.310180010745665	31.745808578947372	16.972596	66.08516241290408	o__Clostridiales (UID1212)	172.0	263.0	149.0	4.0	256.0	3.0	0.0	0.0	0.0	97.99	1.34	0.0
CL0014	13	75	3325483	51.47486846271654	49.04480130873128	50.07936507936508	4.788223060277959	55.89663994899748	84.71996626666667	57.685628	127.65504654173787	o__Clostridiales (UID1212)	172.0	263.0	149.0	4.0	259.0	0.0	0.0	0.0	0.0	97.99	0.0	0.0
CL0015	14	133	3318285	58.18704541653294	56.25192940478545	57.86516853932585	6.148852650423843	29.099488048092013	29.75851111278196	27.765795	31.992129893408734	p__Bacteroidetes (UID2605)	350.0	314.0	208.0	10.0	302.0	2.0	0.0	0.0	0.0	97.89	0.96	0.0
CL0013	12	111	3330627	47.47406419271807	45.62301498535244	47.004352604020774	5.061298324986347	129.00183198959118	115.52275213513514	115.100187	139.86914137570696	o__Clostridiales (UID1226)	155.0	278.0	158.0	5.0	270.0	3.0	0.0	0.0	0.0	97.68	1.9	66.67
CL0059	58	99	2433195	62.10899660734138	60.508019757340634	61.88782836388209	4.1561720868003835	110.72253754972	137.07978856565654	93.05694	169.09906679327943	p__Proteobacteria (UID3887)	1487.0	256.0	161.0	4.0	251.0	1.0	0.0	0.0	0.0	97.52	0.62	0.0
CL0042	41	83	2747235	45.64396566001816	46.12699031406412	45.468683726848575	4.411581698254043	11.000283560343764	18.980654771084332	9.415003	70.16564698179519	o__Clostridiales (UID1212)	172.0	263.0	149.0	21.0	238.0	4.0	0.0	0.0	0.0	97.43	1.7	0.0
CL0053	52	103	2551055	57.494291577406216	56.181316601320546	58.30262486535518	5.366310117007727	228.75875447841702	236.54804862135933	238.472794	137.64790695875286	o__Clostridiales (UID1212)	172.0	261.0	147.0	34.0	225.0	2.0	0.0	0.0	0.0	97.41	1.36	50.0
CL0004	3	168	4099346	41.00607755480996	40.2410974131107	40.7439258578943	3.8173039628575354	44.10203371271857	68.09676584523811	42.1299815	90.61937957038307	f__Lachnospiraceae (UID1286)	57.0	420.0	207.0	6.0	401.0	10.0	3.0	0.0	0.0	97.34	3.84	5.26
CL0077	76	33	2059787	43.802927195870254	41.611309007801324	43.82877327164053	8.00240247603183	68.37662747590747	79.09299751515152	68.508422	124.66503959211089	o__Clostridiales (UID1212)	172.0	263.0	149.0	4.0	257.0	2.0	0.0	0.0	0.0	97.32	1.34	0.0
CL0006	5	190	3841986	58.88766903367165	59.07409025926819	60.77491720469881	5.408378753896363	12.100853071407077	11.934867184210527	11.415839	3.3544475153634865	o__Clostridiales (UID1212)	172.0	257.0	149.0	5.0	246.0	6.0	0.0	0.0	0.0	96.64	3.24	0.0
CL0026	25	169	3044675	49.20791217453422	49.43243004602355	50.84707476846622	4.7306972726652665	88.50967062959361	103.50376711834318	88.77111500000001	98.40299022216983	o__Clostridiales (UID1212)	172.0	263.0	149.0	7.0	256.0	0.0	0.0	0.0	0.0	96.64	0.0	0.0
CL0040	39	119	2763487	58.30517748048028	56.28867519744731	58.20856715706454	5.199881056984793	58.508768084158866	64.58976703361343	57.562703000000006	28.864392826469235	o__Clostridiales (UID1212)	172.0	261.0	147.0	15.0	245.0	1.0	0.0	0.0	0.0	95.79	0.06	0.0
CL0018	17	302	3279564	41.17849201906107	39.9222005540092	40.9455827207881	4.469423835031486	142.14057573916318	136.77141392715228	138.6491155	121.06836170761707	f__Lachnospiraceae (UID1286)	57.0	420.0	207.0	14.0	380.0	24.0	2.0	0.0	0.0	95.46	6.18	23.33
CL0082	81	43	1931438	55.83104402005139	56.1209977989007	56.310123337655675	2.655192631480689	191.03611492135244	192.46246537209305	173.645002	264.22339027731385	f__Bifidobacteriaceae (UID1458)	77.0	464.0	220.0	18.0	428.0	18.0	0.0	0.0	0.0	95.45	5.08	83.33
CL0051	50	54	2568844	52.34023553006722	49.560471558749036	51.983810964474145	5.408388927285834	13.329129566789575	18.26366048148148	13.218470000000002	18.75657967520329	o__Clostridiales (UID1212)	172.0	263.0	149.0	7.0	253.0	3.0	0.0	0.0	0.0	95.3	0.67	0.0
CL0027	26	193	3042770	45.988129237503976	45.077963296465114	46.65588480801336	4.565414793495074	22.145114656309552	27.13330899481865	20.789773	32.86509300373497	f__Lachnospiraceae (UID1286)	57.0	420.0	207.0	21.0	390.0	9.0	0.0	0.0	0.0	95.06	1.87	66.67
CL0067	66	84	2239208	59.064856860104115	58.07237014091238	59.49364369398778	4.17330901003304	134.82473486943329	141.08370029761903	125.0429385	96.65338030190227	o__Clostridiales (UID1212)	172.0	261.0	147.0	35.0	223.0	3.0	0.0	0.0	0.0	95.02	1.36	100.0
CL0002	1	68	4967006	44.759881506082344	43.78001892173137	44.43078125618146	4.664148477995093	27.991843665097445	47.24419939705882	26.361238500000002	111.30377903511541	o__Bacteroidales (UID2621)	198.0	427.0	260.0	23.0	393.0	11.0	0.0	0.0	0.0	94.81	2.69	0.0
CL0046	45	208	2643088	59.17566876320425	58.3886173342593	60.839092844361296	6.105282624116433	13.197260024623096	15.522442447115386	12.098178	27.089630337365012	o__Clostridiales (UID1212)	172.0	263.0	149.0	10.0	248.0	5.0	0.0	0.0	0.0	94.61	1.08	40.0
CL0037	36	294	2864093	57.87849766051591	57.212538674818475	58.51597839398198	4.852155562956039	5.9413359353149495	5.9169491224489805	5.5317865	2.9396017717872067	o__Clostridiales (UID1212)	172.0	263.0	149.0	13.0	240.0	10.0	0.0	0.0	0.0	94.51	2.26	40.0
CL0092	91	66	1681638	41.298483978121325	40.825060799809535	40.99225210283468	2.131578612396749	6.831956172931987	6.935013409090908	6.6121219999999985	1.5792943429029151	o__Clostridiales (UID1212)	172.0	263.0	149.0	9.0	254.0	0.0	0.0	0.0	0.0	93.96	0.0	0.0
CL0081	80	46	1939707	62.297089199554364	62.34021543295022	62.85576820156431	4.095990711134793	26.109037844308443	25.26888628260869	24.9638765	6.665191518809045	o__Clostridiales (UID1212)	172.0	263.0	149.0	14.0	249.0	0.0	0.0	0.0	0.0	92.95	0.0	0.0
CL0008	7	121	3640504	42.1556465808031	42.56643893865899	42.532751091703055	3.2311930516598157	34.356015086642955	32.02496785123967	23.020803	43.31231820970522	o__Bacteroidales (UID2657)	160.0	492.0	269.0	72.0	419.0	1.0	0.0	0.0	0.0	92.84	0.19	0.0
CL0035	34	129	2896019	57.14285714285714	57.27861537260499	58.430799220272895	4.349522414623542	38.555024828572954	41.37557025581396	35.710729	28.17804752396237	o__Clostridiales (UID1212)	172.0	261.0	147.0	46.0	212.0	3.0	0.0	0.0	0.0	92.67	0.88	33.33
CL0044	43	51	2706159	44.54424148765835	44.23531286785895	44.647651106146185	1.9918782489637905	27.483953441786674	28.58249937254902	28.554813	7.6059213005530815	o__Clostridiales (UID1226)	155.0	278.0	158.0	31.0	234.0	13.0	0.0	0.0	0.0	91.77	6.96	7.69
CL0052	51	286	2564243	48.73266691183324	48.264063035092285	49.002908569055535	3.236409544497105	5.8645740983124455	5.6508122972027985	5.5346975	1.9868177012739867	f__Lachnospiraceae (UID1255)	90.0	354.0	174.0	27.0	317.0	10.0	0.0	0.0	0.0	91.48	2.03	20.0
CL0010	9	416	3402418	57.04810520047801	55.96076441421939	57.108319248888904	4.81127482081221	16.814395529010252	16.693487283653845	15.402551500000001	13.364712238854626	o__Clostridiales (UID1212)	172.0	263.0	149.0	17.0	226.0	18.0	2.0	0.0	0.0	91.23	10.03	70.83
CL0005	4	91	4058096	46.267387464466104	44.96903990542474	46.511914290991925	4.6665792324405375	124.42023657739664	121.70480251648351	114.97249	216.10917426308973	o__Bacteroidales (UID2657)	160.0	492.0	269.0	41.0	439.0	12.0	0.0	0.0	0.0	91.08	2.54	66.67
CL0069	68	117	2198385	60.0442142754795	60.417198086144545	60.39492595138412	3.0230048977805013	34.57202918782833	43.557423974358976	34.966091	48.04783961703917	f__Bifidobacteriaceae (UID1462)	65.0	476.0	217.0	59.0	417.0	0.0	0.0	0.0	0.0	90.09	0.0	0.0
CL0070	69	87	2189039	42.923447229583395	42.537384941603975	42.95902308810933	3.2518594344243743	28.01498600905283	34.30749577011494	28.588476	27.54529314444173	f__Lachnospiraceae (UID1256)	33.0	333.0	171.0	58.0	274.0	1.0	0.0	0.0	0.0	89.82	0.06	100.0
CL0063	62	88	2341068	36.428117423329866	36.29709815625426	36.634340763294745	2.0455127515689915	9.906630304876238	13.210531488636365	8.756316499999999	14.303978122292062	o__Clostridiales (UID1212)	172.0	263.0	149.0	26.0	234.0	3.0	0.0	0.0	0.0	89.81	1.48	33.33
CL0020	19	379	3181301	56.04559266790536	56.40940034179308	57.83994795055303	5.1254942155863095	399.3728128744023	374.0175195831135	415.56467299999997	218.32214273230124	o__Clostridiales (UID1212)	172.0	261.0	147.0	46.0	210.0	5.0	0.0	0.0	0.0	88.92	2.38	100.0
CL0045	44	102	2659780	36.14088383249742	36.556827543534624	36.169751265879434	3.435490708411588	11.627364894831905	13.28357176470588	10.867872	15.335800522298818	o__Clostridiales (UID1212)	172.0	263.0	149.0	72.0	190.0	1.0	0.0	0.0	0.0	88.68	0.67	0.0
CL0078	77	138	2034739	59.29758067250886	59.15228684035269	59.93476156974574	3.891243051885041	38.99456655769217	40.61337605072463	39.764067499999996	13.530227607471565	f__Bifidobacteriaceae (UID1458)	77.0	464.0	220.0	81.0	378.0	5.0	0.0	0.0	0.0	87.38	1.89	40.0
CL0034	33	109	2936722	45.75152159448528	45.1045845069911	45.156167284277394	2.996188027361419	7.349949519802011	8.793701192660551	7.398346000000001	12.444975358821022	c__Clostridia (UID1085)	35.0	420.0	196.0	58.0	359.0	3.0	0.0	0.0	0.0	87.23	1.02	0.0
CL0057	56	495	2466005	56.40815813431036	55.73769649229005	56.96735696735697	5.195431398110863	5.081111692694054	4.961643965656567	4.209235	4.399226489216762	o__Clostridiales (UID1212)	172.0	263.0	149.0	63.0	196.0	4.0	0.0	0.0	0.0	86.35	2.24	0.0
CL0022	21	209	3088244	46.49040036991896	45.78407361913907	47.17985611510792	4.401903355181679	16.984851579348973	18.041415813397133	16.317187	15.798969328960078	k__Bacteria (UID203)	5449.0	103.0	57.0	27.0	59.0	17.0	0.0	0.0	0.0	86.2	7.89	41.18
CL0071	70	468	2167545	56.88467828810936	56.11393133199343	57.23338257879924	3.9767337211794214	4.975490835300303	4.683560363247863	4.4485845	1.6655644946554395	o__Clostridiales (UID1212)	172.0	263.0	149.0	50.0	203.0	10.0	0.0	0.0	0.0	86.04	3.2	30.0
CL0049	48	270	2596053	57.436462198576066	56.300095698289596	57.334773418483174	4.251978764625979	5.7020458506779335	5.517136088888888	5.010157	3.1143106648517485	c__Clostridia (UID1118)	387.0	223.0	124.0	21.0	192.0	10.0	0.0	0.0	0.0	86.02	5.24	40.0
CL0039	38	69	2763527	41.726243311536315	41.3454240502804	41.83487318307539	3.0269327948555986	85.28256537805092	96.19985123188404	89.460059	70.31479210631025	k__Bacteria (UID203)	5449.0	103.0	57.0	22.0	56.0	25.0	0.0	0.0	0.0	85.96	6.54	80.0
CL0036	35	341	2864217	57.83681892817479	58.61881388228898	60.473186119873816	5.482401223534494	55.07870937494366	58.81311811730205	60.46925699999999	27.955379634405165	o__Clostridiales (UID1212)	172.0	261.0	147.0	44.0	217.0	0.0	0.0	0.0	0.0	85.46	0.0	0.0
CL0085	84	295	1832890	57.592054078531724	57.08053122301085	57.463295269168036	3.4369160437634267	4.321230670823127	4.232201928813558	4.008895	2.4310799943717263	o__Clostridiales (UID1212)	172.0	263.0	149.0	29.0	234.0	0.0	0.0	0.0	0.0	85.01	0.0	0.0
CL0056	55	146	2480584	43.53587703540779	43.02525414789885	43.407738975522435	2.6287558080429103	18.48976989537262	19.94525033561644	18.181469500000002	12.098980982084985	f__Lachnospiraceae (UID1255)	90.0	354.0	174.0	63.0	291.0	0.0	0.0	0.0	0.0	84.02	0.0	0.0
CL0089	88	35	1795095	44.5721257092243	44.05482679559937	44.83365019011407	2.9609524091268367	8.302103609266362	16.513720085714287	7.84461	39.060487950093204	k__Bacteria (UID2372)	131.0	177.0	106.0	21.0	153.0	3.0	0.0	0.0	0.0	83.96	2.83	0.0
CL0001	0	208	5460325	41.88585844249197	41.41887977336016	41.625336527142245	5.324434134313528	416.38219641500785	335.4224862115385	56.5883755	668.1681960205451	o__Bacteroidales (UID2654)	163.0	486.0	266.0	67.0	401.0	18.0	0.0	0.0	0.0	83.83	4.92	61.11
CL0048	47	78	2617735	29.4530959016096	30.24490655792254	29.292782731531048	4.869672442723503	15.308417648805163	23.66614406410256	14.366743	62.526771192211676	k__Bacteria (UID2372)	131.0	177.0	106.0	37.0	140.0	0.0	0.0	0.0	0.0	82.08	0.0	0.0
CL0073	72	92	2118031	45.087489276597	44.65947690456485	45.240551585408255	2.4558786678718114	61.6776346012641	62.54671340217392	61.776734999999995	22.241103898675853	o__Clostridiales (UID1226)	155.0	278.0	158.0	53.0	224.0	1.0	0.0	0.0	0.0	81.88	0.32	0.0
CL0094	93	52	1575694	64.99339338729474	64.84946296319312	65.60730984564452	5.53218390905896	10.62282781154399	14.175304423076925	10.533977	20.88986925585538	p__Actinobacteria (UID2112)	31.0	211.0	124.0	29.0	182.0	0.0	0.0	0.0	0.0	81.8	0.0	0.0
CL0066	65	62	2266019	41.59612077392113	41.1919986232405	41.86227549589413	3.1839616725420545	53.71487822618171	54.84179383870969	54.401157999999995	32.3517856295369	f__Lachnospiraceae (UID1256)	33.0	333.0	171.0	48.0	267.0	18.0	0.0	0.0	0.0	81.6	4.29	55.56
CL0083	82	181	1911234	49.307515458599006	48.79221105801359	49.75381194409149	3.77713009567231	22.12574665270344	21.624970707182328	22.380755999999998	5.962080930830058	o__Clostridiales (UID1226)	155.0	278.0	158.0	71.0	207.0	0.0	0.0	0.0	0.0	73.86	0.0	0.0
CL0087	86	41	1809563	41.88149293503459	41.58790111017767	41.8471615720524	1.9292706417020855	7.191951013728728	7.146878097560977	7.13474	0.696815995305049	f__Lachnospiraceae (UID1255)	90.0	354.0	174.0	105.0	243.0	5.0	1.0	0.0	0.0	73.69	2.18	25.0
CL0030	29	40	3028240	43.274938578184035	42.195626641701104	43.666076902711495	5.619238602255474	49.33555813425817	46.982137575	48.9203715	20.4918794938716	k__Bacteria (UID2569)	434.0	278.0	186.0	76.0	202.0	0.0	0.0	0.0	0.0	73.12	0.0	0.0
CL0097	96	47	1555274	28.177993073889233	29.85158277827805	28.217942255210414	4.9857013999335225	17.887389478029593	24.90849497872341	17.744484	37.70394353814517	o__Clostridiales (UID1212)	172.0	263.0	149.0	53.0	208.0	1.0	0.0	1.0	0.0	73.09	2.68	0.0
CL0075	74	279	2100872	59.721296680616426	58.94380120715624	60.369919688488686	4.582971282835104	73.41248573430414	78.842219172043	62.279079	60.50964270112968	k__Bacteria (UID203)	5449.0	102.0	56.0	57.0	42.0	3.0	0.0	0.0	0.0	68.93	4.46	33.33
CL0064	63	146	2329539	40.90354357664757	41.288645164491015	41.94526895000294	3.2317755028232606	60.404750284122755	66.80142734246576	65.44794499999999	35.01918549750036	o__Clostridiales (UID1226)	155.0	278.0	158.0	102.0	175.0	1.0	0.0	0.0	0.0	67.87	0.63	100.0
CL0095	94	363	1574569	60.07034305895772	60.16236113149964	61.223482979773074	4.5080391145045215	5.612118373018903	4.820466504132232	3.988928	4.29789330355955	o__Clostridiales (UID1212)	172.0	263.0	149.0	98.0	163.0	2.0	0.0	0.0	0.0	67.66	0.67	50.0
CL0093	92	41	1629017	40.964888641432225	40.18714429340868	40.96011733513849	3.043510968678258	17.994420771896795	25.880529853658537	15.252842000000001	56.947490347804184	f__Lachnospiraceae (UID1256)	33.0	333.0	171.0	134.0	195.0	4.0	0.0	0.0	0.0	63.65	1.17	0.0
CL0079	78	236	1990735	55.07146857818846	54.96856527703538	55.34854220062014	2.5919847799217397	4.40035061356333	4.400806686440678	4.2388720000000015	2.176412225046218	o__Clostridiales (UID1212)	172.0	263.0	149.0	89.0	172.0	2.0	0.0	0.0	0.0	62.16	0.19	50.0
CL0100	99	59	1409099	43.60013029602605	42.754790890516965	43.07495490960949	2.8758360962662213	24.954411379585114	25.28458110169491	24.234538	7.708688151206579	f__Lachnospiraceae (UID1256)	33.0	333.0	171.0	138.0	195.0	0.0	0.0	0.0	0.0	61.26	0.0	0.0
CL0061	60	57	2388437	38.624255109094356	38.61261696238151	38.47998990026512	3.4848221377335182	83.39504737023081	97.62925021052631	59.334289	243.7498850235096	o__Clostridiales (UID1212)	172.0	263.0	149.0	86.0	175.0	2.0	0.0	0.0	0.0	60.4	0.16	0.0
CL0074	73	50	2107131	35.9194563603307	36.83055471151441	36.726995871393655	3.4007987220482896	46.44038276904949	49.99785482	50.3604025	21.939342108390356	k__Bacteria (UID2569)	434.0	278.0	186.0	117.0	133.0	27.0	1.0	0.0	0.0	60.23	8.06	13.33
CL0091	90	155	1682051	59.09357088459268	58.84816899837622	59.651941097724226	3.7369793952293375	18.73174749326804	19.165901154838707	18.424811	6.028048398930245	k__Bacteria (UID203)	5449.0	102.0	56.0	67.0	35.0	0.0	0.0	0.0	0.0	55.68	0.0	0.0
CL0102	101	95	1224207	54.84513648427105	55.47889277664244	55.89985126425385	3.1991029027488493	24.427247672173905	27.47050377894737	24.130589999999998	34.84082376231384	o__Clostridiales (UID1212)	172.0	263.0	149.0	124.0	138.0	1.0	0.0	0.0	0.0	53.31	0.67	0.0
CL0096	95	380	1573344	49.59907051477617	49.40991869149434	49.581437856588074	2.6575804452961216	3.698279603476417	3.626828321052632	3.4631255000000003	1.2362064585892845	o__Clostridiales (UID1212)	172.0	263.0	149.0	115.0	144.0	4.0	0.0	0.0	0.0	50.52	1.45	0.0
CL0101	100	313	1333304	62.702654458398094	62.73692763509386	63.14370832742233	2.8623622206674515	4.062218820149044	4.01527245686901	3.9860830000000003	1.0321314579054477	o__Clostridiales (UID1212)	172.0	263.0	149.0	141.0	121.0	1.0	0.0	0.0	0.0	49.52	0.67	0.0
CL0076	75	24	2068869	43.14874455560019	42.31830882324112	43.03996821524165	2.461416268217831	7.4606762236980675	7.88603025	7.1827165	3.036724599918008	k__Bacteria (UID2569)	434.0	278.0	186.0	135.0	143.0	0.0	0.0	0.0	0.0	47.85	0.0	0.0
CL0090	89	57	1753337	50.27801272658935	50.064686510837774	50.541290770298396	2.525159823272248	7.535526637577374	10.538576280701754	7.0004740000000005	23.338874993970407	o__Clostridiales (UID1226)	155.0	278.0	158.0	171.0	106.0	1.0	0.0	0.0	0.0	47.07	0.63	100.0
CL0099	98	90	1503570	43.424250284323314	43.35811750883304	44.0237196060649	2.6944368701337784	46.77349355100194	48.512336055555544	51.9505625	14.482095203825764	o__Clostridiales (UID1226)	155.0	278.0	158.0	148.0	130.0	0.0	0.0	0.0	0.0	45.15	0.0	0.0
CL0088	87	46	1798461	49.57888995090803	48.9423287977145	49.766609765208294	2.972580862630003	14.110695991587253	13.499105021739133	13.337256	2.7257082251238014	o__Clostridiales (UID1226)	155.0	278.0	158.0	146.0	131.0	1.0	0.0	0.0	0.0	44.27	0.21	0.0
CL0098	97	284	1524489	56.9010993191817	57.745307969199935	58.29595570674549	3.921709033799604	41.270526435137285	50.37442776760564	42.59574050000001	84.79880347347013	k__Bacteria (UID203)	5449.0	102.0	56.0	78.0	24.0	0.0	0.0	0.0	0.0	37.5	0.0	0.0
CL0105	104	305	840072	60.36923025645421	60.199030351336575	60.90159104301709	3.5583337569141604	5.089130047197145	5.184662052459016	3.519421	18.724486923082274	k__Bacteria (UID203)	5449.0	104.0	58.0	81.0	23.0	0.0	0.0	0.0	0.0	34.8	0.0	0.0
CL0114	113	4	387031	43.788223682340686	43.86433830121088	43.77592904700115	0.4148044189019451	8.448501322028468	8.438502	8.34373	0.4968057374713985	k__Bacteria (UID203)	5449.0	104.0	58.0	90.0	14.0	0.0	0.0	0.0	0.0	22.41	0.0	0.0
CL0115	114	18	356502	38.339195853038696	39.112307647805046	39.48999957839765	2.3595737181732543	52.770439533444424	59.34814855555555	70.0287155	25.292010469904426	k__Bacteria (UID203)	5449.0	104.0	58.0	90.0	13.0	1.0	0.0	0.0	0.0	22.41	1.72	100.0
CL0107	106	13	567172	44.01380886221464	43.99193559812654	44.422024930499504	0.9089026366706892	13.779825662615574	14.0886	13.837157999999999	1.9274500607858118	k__Bacteria (UID203)	5449.0	103.0	57.0	92.0	10.0	1.0	0.0	0.0	0.0	19.3	1.75	0.0
CL0104	103	47	1060432	62.13213105602245	62.04626287158167	62.83986031429284	3.0773348557944797	6.454721884293384	6.609238978723407	6.542147	1.3991688004449396	k__Bacteria (UID203)	5449.0	104.0	58.0	92.0	12.0	0.0	0.0	0.0	0.0	18.97	0.0	0.0
CL0103	102	10	1090469	42.56086142751422	41.683316295302035	42.91530430385442	4.289965364376262	18.733689353633164	17.289140300000003	18.190169	6.011569922355491	k__Bacteria (UID203)	5449.0	104.0	58.0	90.0	14.0	0.0	0.0	0.0	0.0	18.28	0.0	0.0
CL0109	108	10	448280	39.10368519675203	40.28694354149385	38.93478277165714	5.4475349393637815	28.23338603883287	93.0268007	8.394693	172.7336651194683	o__Clostridiales (UID1226)	155.0	274.0	157.0	228.0	46.0	0.0	0.0	0.0	0.0	15.92	0.0	0.0
CL0106	105	84	806813	49.96783641314654	49.688059853779386	50.2118365237653	2.814573561683368	9.430445479912938	10.503514892857146	6.898374	7.642065934750779	k__Bacteria (UID203)	5449.0	103.0	57.0	92.0	11.0	0.0	0.0	0.0	0.0	15.79	0.0	0.0
CL0111	110	78	442072	61.10226388461608	61.708408829873505	61.907759035420675	3.762268682430781	8.514122607835377	11.484490128205127	5.755388	49.715661350517024	o__Clostridiales (UID1212)	172.0	257.0	149.0	214.0	42.0	1.0	0.0	0.0	0.0	15.39	0.67	0.0
CL0222	221	9	69204	46.7357378186232	46.68773288962168	46.49139048324385	1.1745888964232298	4.683687924397433	4.4862474444444445	4.664045	0.4031546884168274	k__Bacteria (UID203)	5449.0	103.0	57.0	96.0	6.0	1.0	0.0	0.0	0.0	12.28	1.75	0.0
CL0108	107	6	486049	42.613193320015064	42.37489633549611	42.53056573682264	1.6714300578743817	7.8146441942993405	7.756746333333332	7.672771000000001	0.8811952226626942	k__Bacteria (UID203)	5449.0	104.0	58.0	96.0	8.0	0.0	0.0	0.0	0.0	12.07	0.0	0.0
CL0204	203	5	74548	37.21226592262703	42.41197933495149	43.19294809010773	4.896688789134684	35.65062123168965	113.21155420000001	107.968538	62.06720236543725	k__Bacteria (UID203)	5449.0	103.0	57.0	96.0	7.0	0.0	0.0	0.0	0.0	10.53	0.0	0.0
CL0154	153	4	115973	41.288058427392585	41.31574302318091	41.25746548033164	0.27412617307290765	18.677157854724808	19.23372825	18.767307	2.1001694511615465	k__Bacteria (UID203)	5449.0	103.0	57.0	95.0	8.0	0.0	0.0	0.0	0.0	10.53	0.0	0.0
CL0187	186	2	86006	43.500453456735585	43.25770249344603	43.25770249344603	1.0634698119743682	11.967845230832731	11.9386845	11.9386845	0.12775050000000032	k__Bacteria (UID203)	5449.0	103.0	57.0	97.0	6.0	0.0	0.0	0.0	0.0	10.53	0.0	0.0
CL0271	270	7	55336	46.02067370247217	44.76099774315151	46.14575665159322	3.7671238502872666	4.910652005800925	4.793521714285714	4.544351	0.35135991628394553	k__Bacteria (UID203)	5449.0	103.0	57.0	96.0	7.0	0.0	0.0	0.0	0.0	8.77	0.0	0.0
CL0263	262	4	58208	38.66307036833425	37.59713215760512	38.35578931279187	2.0020317997062778	50.95275510142936	44.11456375	43.8443895	20.575951982201364	k__Bacteria (UID203)	5449.0	103.0	57.0	98.0	5.0	0.0	0.0	0.0	0.0	8.77	0.0	0.0
CL0259	258	4	59402	40.93464866502811	39.79716346081216	41.27499104044015	3.2953733740025135	19.520234395441236	18.77039175	18.4464065	6.608814907833074	k__Bacteria (UID203)	5449.0	103.0	57.0	97.0	6.0	0.0	0.0	0.0	0.0	8.77	0.0	0.0
CL0188	187	6	84948	40.248151810519374	39.53775752317888	39.380699595728345	1.215526416098132	27.94813355688186	59.21321533333333	31.460936	49.92936748283322	k__Bacteria (UID203)	5449.0	103.0	57.0	97.0	6.0	0.0	0.0	0.0	0.0	8.77	0.0	0.0
CL0158	157	11	113032	38.42186283530328	38.37847287799297	38.84093711467325	4.3838219549881465	143.29719224930994	327.9348258181819	181.88806499999998	356.6729992850475	k__Bacteria (UID203)	5449.0	103.0	57.0	98.0	5.0	0.0	0.0	0.0	0.0	8.77	0.0	0.0
CL0198	197	3	78593	42.474520631608414	41.21171849178624	39.69046008119079	2.2192032248422797	32.124013779929506	36.828402	29.041911	16.641776513662258	k__Bacteria (UID203)	5449.0	103.0	57.0	98.0	5.0	0.0	0.0	0.0	0.0	8.77	0.0	0.0
CL0181	180	18	90026	56.25819207784418	56.36418357548225	56.42172038532575	2.064838224767216	3.5031676855019658	3.5629877777777783	3.3679455000000003	0.6742074511719962	k__Bacteria (UID203)	5449.0	104.0	58.0	89.0	15.0	0.0	0.0	0.0	0.0	8.62	0.0	0.0
CL0122	121	8	227821	38.419197527883725	38.2845347184234	38.83387383046907	1.4838118697899048	7.800620347926662	9.85488475	6.967352	7.839547254253475	root (UID1)	5656.0	56.0	24.0	54.0	2.0	0.0	0.0	0.0	0.0	8.33	0.0	0.0
CL0113	112	7	411487	41.673005465543255	41.682351964022075	41.96145019999574	1.5718740857505915	14.133131089900775	15.453709714285711	14.534742999999999	2.3591178876949943	root (UID1)	5656.0	56.0	24.0	54.0	1.0	1.0	0.0	0.0	0.0	8.33	4.17	0.0
CL0131	130	7	197162	61.648289224089844	61.37325722067279	61.08719638222816	1.3291947658796113	5.135824603326198	4.970547285714287	4.976621	0.6193009627449124	k__Bacteria (UID203)	5449.0	104.0	58.0	99.0	5.0	0.0	0.0	0.0	0.0	6.9	0.0	0.0
CL0116	115	52	349530	53.191142391211045	53.09364254901725	53.789485092651894	3.2879437777490814	5.458568558999229	5.521902365384616	3.7151055	13.005230610208711	k__Bacteria (UID203)	5449.0	103.0	57.0	94.0	9.0	0.0	0.0	0.0	0.0	6.22	0.0	0.0
CL0162	161	10	105903	38.01214318763397	37.345309264806794	37.89124448399809	3.5796373333358367	68.49539456465823	60.8684675	67.09651	31.105807631897413	k__Bacteria (UID203)	5449.0	104.0	58.0	98.0	6.0	0.0	0.0	0.0	0.0	5.75	0.0	0.0
CL0191	190	6	83420	40.115080316470866	39.262265568736076	39.34015438329636	2.0628726397310007	63.47941196307839	63.18725033333334	64.55645	33.60473587634	k__Bacteria (UID203)	5449.0	104.0	58.0	101.0	2.0	1.0	0.0	0.0	0.0	5.17	1.72	100.0
CL0125	124	6	218056	42.691326998569174	42.61911793194539	42.72979944965469	1.6910308591481855	14.568054003558721	14.987834666666664	14.925061	1.088170380308872	k__Bacteria (UID203)	5449.0	104.0	58.0	101.0	3.0	0.0	0.0	0.0	0.0	5.17	0.0	0.0
CL0176	175	13	96496	54.97429945282706	55.3163147949203	55.102040816326536	2.2531175306729683	3.5227566188857584	3.472779384615385	3.384632	0.32864522660825385	k__Bacteria (UID203)	5449.0	104.0	58.0	96.0	8.0	0.0	0.0	0.0	0.0	4.94	0.0	0.0
CL0146	145	2	125825	38.85396383866481	38.66741861076818	38.66741861076818	0.3238373270249291	7.223359509858931	6.640739	6.640739	1.011413	k__Bacteria (UID203)	5449.0	103.0	57.0	94.0	9.0	0.0	0.0	0.0	0.0	4.63	0.0	0.0
CL0202	201	6	75102	38.89377113791909	38.08872439914344	39.99876008845905	5.048106663685485	298.98009221376265	122.5980365	15.5327775	160.34359283665003	root (UID1)	5656.0	56.0	24.0	55.0	1.0	0.0	0.0	0.0	0.0	4.17	0.0	0.0
CL0156	155	16	115116	56.65763230133082	56.786270942660074	58.01437973211119	3.281628627258729	4.037094014611348	3.9038189375	4.055234	0.5538773451550971	root (UID1)	5656.0	56.0	24.0	55.0	1.0	0.0	0.0	0.0	0.0	4.17	0.0	0.0
CL0163	162	6	104958	41.5251815011719	41.49530388335087	41.99661680997728	1.6600966192121729	25.22609758240439	25.433757666666665	26.3924615	4.987288989185561	root (UID1)	5656.0	56.0	24.0	55.0	1.0	0.0	0.0	0.0	0.0	4.17	0.0	0.0
CL0110	109	8	443791	42.68225358333089	42.91318093315553	43.02220787991447	7.686861488000063	16.914533845823822	13.796687250000002	16.594262999999998	5.7178807494722586	root (UID1)	5656.0	56.0	24.0	55.0	1.0	0.0	0.0	0.0	0.0	4.17	0.0	0.0
CL0153	152	11	118619	42.75284735160472	42.43840672447279	42.73680591370122	1.284985706649084	47.31252026768055	48.5645860909091	51.537026000000004	6.3289379283194025	root (UID1)	5656.0	56.0	24.0	55.0	1.0	0.0	0.0	0.0	0.0	4.17	0.0	0.0
CL0228	227	7	67751	44.642883499874536	45.24581477981	43.61008443763334	4.814138445588992	214.76022847980101	263.5415602857143	167.215509	296.5878104823409	root (UID1)	5656.0	56.0	24.0	55.0	1.0	0.0	0.0	0.0	0.0	4.17	0.0	0.0
CL0150	149	6	121011	36.627248762509204	37.1108250452648	37.27213922589817	3.6753409771195864	45.429321862334824	56.572881499999994	30.386378499999996	54.787032621985254	root (UID1)	5656.0	56.0	24.0	55.0	1.0	0.0	0.0	0.0	0.0	4.17	0.0	0.0
CL0223	222	8	69092	56.08319342326174	56.68629781509512	56.879220227265094	2.3986501888997345	32.623722911263236	32.24029175	28.9221985	9.991891866485217	root (UID1)	5656.0	56.0	24.0	55.0	1.0	0.0	0.0	0.0	0.0	4.17	0.0	0.0
CL0147	146	15	124669	55.286398382917966	55.12796486069765	54.898685772053966	1.3647235947379863	3.8836395721791295	3.6628014	3.606107	0.4926640252683092	root (UID1)	5656.0	56.0	24.0	55.0	1.0	0.0	0.0	0.0	0.0	4.17	0.0	0.0
CL0210	209	15	72805	52.7051713481217	52.22541410766949	52.71161114529313	3.891902148324863	3.801317443650848	3.627245133333333	3.5585709999999997	0.40158394821537496	root (UID1)	5656.0	56.0	24.0	55.0	1.0	0.0	0.0	0.0	0.0	4.17	0.0	0.0
CL0143	142	10	133874	46.304734302403745	45.78374137951602	45.952784539229256	1.2174725871187781	5.369529792999387	5.1154128	5.2612975	0.736458037679785	root (UID1)	5656.0	56.0	24.0	55.0	1.0	0.0	0.0	0.0	0.0	4.17	0.0	0.0
CL0201	200	2	75862	44.56381323983022	44.698099390411016	44.698099390411016	0.4451676260863913	13.668678493488176	13.658104500000002	13.658104500000002	0.03505350000000007	root (UID1)	5656.0	56.0	24.0	55.0	1.0	0.0	0.0	0.0	0.0	4.17	0.0	0.0
CL0260	259	7	59235	46.729129737486275	46.55272288458434	47.07428499906127	2.0926091789592776	5.535792314138602	5.6877067142857145	5.868529	0.4144815518512992	root (UID1)	5656.0	56.0	24.0	55.0	1.0	0.0	0.0	0.0	0.0	4.17	0.0	0.0
CL0211	210	8	72627	40.11731174356644	40.604157725085365	40.47670263055465	2.3132208051321768	63.21194423829981	53.692384499999996	58.5197755	30.26000897310585	root (UID1)	5656.0	56.0	24.0	55.0	1.0	0.0	0.0	0.0	0.0	4.17	0.0	0.0
CL0183	182	16	89709	58.07667012228428	60.15819521874407	61.722727939200496	4.723728308621797	8.867903501298645	5.062266	4.2752805	3.2436197835872536	root (UID1)	5656.0	56.0	24.0	55.0	1.0	0.0	0.0	0.0	0.0	4.17	0.0	0.0
CL0119	118	4	249754	42.826140922667896	44.937946562543594	44.69539456587826	3.0248598481893323	43.864233780059564	123.4377185	46.5626435	136.45407356469772	root (UID1)	5656.0	56.0	24.0	55.0	1.0	0.0	0.0	0.0	0.0	4.17	0.0	0.0
CL0216	215	7	71322	34.36527298729705	36.64930636281073	32.86559964919974	6.3330603235071905	63.91673034004934	97.26473485714286	124.01733300000001	82.35297011038928	root (UID1)	5656.0	56.0	24.0	55.0	1.0	0.0	0.0	0.0	0.0	4.17	0.0	0.0
CL0135	134	2	158302	43.213604376445026	41.07278926316633	41.07278926316633	2.417882978712086	9.28508610041566	9.497277	9.497277	0.2396529999999997	root (UID1)	5656.0	56.0	24.0	55.0	1.0	0.0	0.0	0.0	0.0	4.17	0.0	0.0
CL0192	191	11	83073	41.59714949502246	44.609411669233296	41.56769596199525	9.420626593684917	34.70849054296824	38.586375	30.184175	29.06377408548493	root (UID1)	5656.0	56.0	24.0	55.0	1.0	0.0	0.0	0.0	0.0	4.17	0.0	0.0
CL0252	251	2	60909	37.017517936593926	33.54740840387418	33.54740840387418	5.136477229785113	46.98736400482687	29.945501500000002	29.945501500000002	25.2254685	root (UID1)	5656.0	56.0	24.0	55.0	1.0	0.0	0.0	0.0	0.0	4.17	0.0	0.0
CL0121	120	37	230193	62.380697936079734	62.0406750540534	62.462941847206395	2.8497107494854896	3.9090910283544673	3.8114327297297295	3.731928	0.8891058858391496	root (UID1)	5656.0	56.0	24.0	55.0	1.0	0.0	0.0	0.0	0.0	4.17	0.0	0.0
CL0244	243	2	62978	43.04360252786688	42.38113472469792	42.38113472469792	1.265803923178833	7.483661909889167	7.2137044999999995	7.2137044999999995	0.5158185000000004	root (UID1)	5656.0	56.0	24.0	55.0	1.0	0.0	0.0	0.0	0.0	4.17	0.0	0.0
CL0294	293	3	50729	44.0793234638964	44.69903838621311	44.37480735641631	1.1957843005797002	43.82430526339964	41.170413	47.708626	12.511902496701474	k__Bacteria (UID203)	5449.0	104.0	58.0	101.0	3.0	0.0	0.0	0.0	0.0	4.02	0.0	0.0
CL0265	264	7	57465	41.3677890890107	44.633308350588464	47.30179880079947	4.752462001401281	38.158168730844864	29.80363757142857	22.624277	25.90763869835277	k__Bacteria (UID203)	5449.0	103.0	57.0	101.0	2.0	0.0	0.0	0.0	0.0	3.51	0.0	0.0
CL0214	213	8	71854	52.26013861441257	52.195759283809004	52.30447766376797	1.3161860340292428	4.702918845993263	4.808487875	4.665989	0.3942559565353571	k__Bacteria (UID203)	5449.0	103.0	57.0	100.0	3.0	0.0	0.0	0.0	0.0	3.51	0.0	0.0
CL0229	228	6	67579	44.37917104425931	43.90964652674595	44.51324782997083	2.111656117133444	50.13532004897972	56.37928400000001	56.858418500000006	8.325157576446468	k__Bacteria (UID203)	5449.0	103.0	57.0	90.0	12.0	1.0	0.0	0.0	0.0	3.51	0.16	100.0
CL0120	119	19	239403	46.998993329239816	47.325781913326615	47.9366920782234	2.2734848918919024	6.0807924292343865	5.450340263157893	5.601185	1.3906657024690632	k__Bacteria (UID203)	5449.0	103.0	57.0	91.0	12.0	0.0	0.0	0.0	0.0	3.51	0.0	0.0
CL0290	289	4	51186	43.064509826905784	44.58452141495943	43.973084644686175	2.3182672742933663	55.57891472021647	46.001386	48.1819845	13.90744838304297	k__Bacteria (UID203)	5449.0	103.0	57.0	99.0	4.0	0.0	0.0	0.0	0.0	3.51	0.0	0.0
CL0185	184	3	87524	60.080663589415465	57.98590559602644	58.07021599841469	6.0996329956347175	177.94845129086875	101.16002533333334	41.597584999999995	97.86305129725493	k__Bacteria (UID203)	5449.0	104.0	58.0	101.0	3.0	0.0	0.0	0.0	0.0	3.45	0.0	0.0
CL0112	111	6	421415	42.30224363157458	40.44063971370782	42.279646386046366	5.189889263720246	19.21410793002148	17.768452	18.5427435	2.0080025294632144	k__Bacteria (UID203)	5449.0	104.0	58.0	102.0	2.0	0.0	0.0	0.0	0.0	3.45	0.0	0.0
CL0227	226	2	68144	43.292146043672226	42.75788320873568	42.75788320873568	1.370944668772232	8.310578979191124	8.0826455	8.0826455	0.5848884999999999	k__Bacteria (UID203)	5449.0	104.0	58.0	100.0	4.0	0.0	0.0	0.0	0.0	3.45	0.0	0.0
CL0139	138	7	146310	45.383774178114955	45.942253764594575	44.087705559906034	5.967708657449225	140.050177936163	122.800381	132.78051000000002	129.47793596353398	k__Bacteria (UID203)	5449.0	104.0	58.0	102.0	2.0	0.0	0.0	0.0	0.0	3.45	0.0	0.0
CL0238	237	2	65237	42.98940785137269	43.26521962547948	43.26521962547948	1.0298856795492135	7.180129492741848	7.295945	7.295945	0.4324569999999999	k__Bacteria (UID203)	5449.0	104.0	58.0	101.0	3.0	0.0	0.0	0.0	0.0	3.45	0.0	0.0
CL0289	288	6	51238	39.343846364026696	38.56430750200597	39.84266392164324	3.006264532855744	61.6092417725321	56.56918983333333	67.1665215	19.257945419378647	k__Bacteria (UID203)	5449.0	104.0	58.0	101.0	3.0	0.0	0.0	0.0	0.0	3.45	0.0	0.0
CL0129	128	7	212949	47.95608338146693	42.029342615086705	41.46205357142857	5.337451884531228	83.56734970158112	46.08081671428572	8.261695	46.65007758807292	k__Bacteria (UID203)	5449.0	104.0	58.0	102.0	2.0	0.0	0.0	0.0	0.0	3.45	0.0	0.0
CL0136	135	26	154778	60.229489979196	60.438989492544614	60.59991613522295	4.137342605130808	5.011394066120507	4.992782230769231	4.176516	2.852995730993252	k__Bacteria (UID203)	5449.0	104.0	58.0	102.0	2.0	0.0	0.0	0.0	0.0	3.45	0.0	0.0
CL0258	257	6	59447	45.992228371490576	48.557444330704186	49.12146239256575	5.662152520461858	30.080375968795728	54.13958283333334	53.499199499999996	40.48888126938881	o__Clostridiales (UID1212)	172.0	263.0	149.0	243.0	20.0	0.0	0.0	0.0	0.0	3.36	0.0	0.0
CL0232	231	4	66416	45.09304986750181	45.06115035407547	45.215069114202464	0.5637346581065735	4.471627179128523	4.33852675	4.3311639999999985	0.28268003319333945	k__Bacteria (UID203)	5449.0	103.0	57.0	91.0	12.0	0.0	0.0	0.0	0.0	2.87	0.0	0.0
CL0291	290	4	50902	49.078621665160505	47.86200002765611	49.343134240862064	3.56605038465488	9.544702120820402	15.8583665	4.82604	19.503583477723392	o__Clostridiales (UID1120)	304.0	247.0	141.0	230.0	17.0	0.0	0.0	0.0	0.0	2.77	0.0	0.0
CL0148	147	4	123907	41.5747294341724	41.47887651184294	41.12153583668039	1.315342297440062	22.974630491772057	22.65387575	20.7326555	5.800972014767887	o__Clostridiales (UID1226)	155.0	278.0	158.0	243.0	35.0	0.0	0.0	0.0	0.0	1.9	0.0	0.0
CL0165	164	9	102527	40.68879417129146	41.573345474506176	41.234576225473674	3.9002878545096302	70.48377677938494	57.189758444444436	64.263532	29.48840301343082	o__Clostridiales (UID1226)	155.0	278.0	158.0	263.0	14.0	1.0	0.0	0.0	0.0	1.9	0.06	100.0
CL0152	151	5	118843	40.69234199742517	41.60768225078947	41.5587805387346	1.6183853308715994	22.236213869256073	26.4406328	26.170132000000002	7.3337211742886845	k__Bacteria (UID203)	5449.0	103.0	57.0	101.0	2.0	0.0	0.0	0.0	0.0	1.75	0.0	0.0
CL0220	219	4	69695	51.41545304541215	50.477695461095294	50.547061151269425	1.733804472984029	4.110067126867063	3.92673325	4.0815980000000005	0.4268486167321941	k__Bacteria (UID203)	5449.0	104.0	58.0	102.0	2.0	0.0	0.0	0.0	0.0	1.72	0.0	0.0
CL0127	126	3	215619	42.70634777083652	42.996689832952995	42.96581694368532	0.7336162688720049	17.801188334784968	18.105808666666665	18.605012	0.8809855383729192	k__Bacteria (UID203)	5449.0	104.0	58.0	103.0	1.0	0.0	0.0	0.0	0.0	1.72	0.0	0.0
CL0218	217	3	70960	40.55947012401354	39.24815388538584	39.71512993408592	1.8065413380345363	26.77774846001973	23.519203666666666	27.809948	6.2149930263211255	f__Lachnospiraceae (UID1256)	33.0	333.0	171.0	304.0	29.0	0.0	0.0	0.0	0.0	1.17	0.0	0.0
CL0245	244	3	62964	41.15367511593927	40.71732083241354	40.72825354012137	0.4232389232374025	19.17042181711772	38.27569066666667	40.597671000000005	16.73216990326663	root (UID1)	5656.0	56.0	24.0	56.0	0.0	0.0	0.0	0.0	0.0	0.0	0.0	0.0
CL0243	242	8	63370	50.446583556888115	50.23805444799414	51.267875484230224	1.4635454124347531	3.9932653436168537	3.924612125	3.875536	0.4991665375364313	root (UID1)	5656.0	56.0	24.0	56.0	0.0	0.0	0.0	0.0	0.0	0.0	0.0	0.0
CL0242	241	2	63557	41.078087386125844	41.14416895285672	41.14416895285672	0.12712855697290948	13.163209911056216	13.48467	13.48467	0.6184289999999999	root (UID1)	5656.0	56.0	24.0	56.0	0.0	0.0	0.0	0.0	0.0	0.0	0.0	0.0
CL0241	240	7	64637	41.62786020390798	40.28261346208888	41.159747071222	4.341690263217676	96.61743674570296	105.82731471428572	105.615489	88.974987320259	root (UID1)	5656.0	56.0	24.0	56.0	0.0	0.0	0.0	0.0	0.0	0.0	0.0	0.0
CL0240	239	2	64785	40.08026549355561	37.650508801548064	37.650508801548064	2.5319166056796507	11.146306888353786	9.577639999999999	9.577639999999999	1.6346220000000002	root (UID1)	5656.0	56.0	24.0	56.0	0.0	0.0	0.0	0.0	0.0	0.0	0.0	0.0
CL0246	245	2	62828	42.492200929521864	42.15123248752903	42.15123248752903	2.0834823257660027	114.60070141376455	114.10561299999999	114.10561299999999	3.0252300000000005	root (UID1)	5656.0	56.0	24.0	56.0	0.0	0.0	0.0	0.0	0.0	0.0	0.0	0.0
CL0275	274	5	54462	40.34372590062796	40.79818182683639	40.88985389909101	2.2071956794242737	60.803317691509676	62.7025394	67.151886	14.251958841886589	root (UID1)	5656.0	56.0	24.0	56.0	0.0	0.0	0.0	0.0	0.0	0.0	0.0	0.0
CL0293	292	7	50734	36.99294358812631	37.51497868332746	38.19354838709677	2.3539134700143367	55.41681734503489	64.92929242857143	86.655172	36.3806911931356	root (UID1)	5656.0	56.0	24.0	56.0	0.0	0.0	0.0	0.0	0.0	0.0	0.0	0.0
CL0292	291	3	50768	43.757878978884335	44.34315804988949	43.72127190681079	1.4018325043960462	421.3366247173023	166.649058	32.034539	198.39543619117444	root (UID1)	5656.0	56.0	24.0	56.0	0.0	0.0	0.0	0.0	0.0	0.0	0.0	0.0
CL0239	238	3	64978	36.287666594847494	35.97449316183593	36.342365461544276	0.7774611724132501	31.658400273246325	30.56032033333333	24.520132999999998	17.161756526813456	root (UID1)	5656.0	56.0	24.0	56.0	0.0	0.0	0.0	0.0	0.0	0.0	0.0	0.0
CL0288	287	8	51285	55.53865652724969	55.55358799074975	54.84657206857626	2.266617533793488	3.580473215696597	3.51142175	3.3063230000000003	0.4636413706235537	k__Bacteria (UID203)	5449.0	104.0	58.0	104.0	0.0	0.0	0.0	0.0	0.0	0.0	0.0	0.0
CL0237	236	2	65334	48.68980928766033	42.09365908544847	42.09365908544847	7.276905158746902	24.55634920381425	20.045344	20.045344	4.976563	root (UID1)	5656.0	56.0	24.0	56.0	0.0	0.0	0.0	0.0	0.0	0.0	0.0	0.0
CL0236	235	9	65368	45.604883123240725	45.82586183496428	45.56065442936953	1.3186189833203548	4.414219747032186	4.436645111111111	4.40425	0.6380557280153593	root (UID1)	5656.0	56.0	24.0	56.0	0.0	0.0	0.0	0.0	0.0	0.0	0.0	0.0
CL0235	234	5	65630	41.54197775407589	41.10600476987208	42.14174001042657	4.862079512017228	29.35934079672406	43.3099982	39.486748	24.873269294234916	root (UID1)	5656.0	56.0	24.0	56.0	0.0	0.0	0.0	0.0	0.0	0.0	0.0	0.0
CL0234	233	2	66030	43.961835529304864	43.5825136420436	43.5825136420436	0.5488828939310402	18.64630543333333	14.0702745	14.0702745	6.621566499999999	root (UID1)	5656.0	56.0	24.0	56.0	0.0	0.0	0.0	0.0	0.0	0.0	0.0	0.0
CL0295	294	5	50660	54.41373864982234	55.134043595805494	54.303797468354425	1.7988650901215768	28.40721262897749	27.542247399999997	24.482373000000003	24.554692599160965	root (UID1)	5656.0	56.0	24.0	56.0	0.0	0.0	0.0	0.0	0.0	0.0	0.0	0.0
CL0230	229	3	67241	41.904492794574736	43.85722262557286	42.65356265356265	2.682072293825424	21.200169479424762	15.517083333333336	20.10676	8.508065389577013	root (UID1)	5656.0	56.0	24.0	56.0	0.0	0.0	0.0	0.0	0.0	0.0	0.0	0.0
CL0233	232	6	66138	50.86939429677342	50.75413356473892	50.74155140203232	1.1774532364173902	14.62185163388672	14.806058166666665	14.748222	4.479994388145308	root (UID1)	5656.0	56.0	24.0	56.0	0.0	0.0	0.0	0.0	0.0	0.0	0.0	0.0
CL0231	230	2	66612	39.182129346063775	41.038865111017905	41.038865111017905	1.981620834670508	28.431662637152467	22.040198999999998	22.040198999999998	6.821357000000001	root (UID1)	5656.0	56.0	24.0	56.0	0.0	0.0	0.0	0.0	0.0	0.0	0.0	0.0
CL0247	246	3	62575	41.228925289652416	39.18855838580645	37.91352400866253	2.215647074168579	28.247841520703158	62.70875333333333	65.502776	37.981148208749275	root (UID1)	5656.0	56.0	24.0	56.0	0.0	0.0	0.0	0.0	0.0	0.0	0.0	0.0
CL0251	250	2	60935	42.76688274390745	36.48395187324458	36.48395187324458	6.605082425061535	41.933112242865356	23.739307500000002	23.739307500000002	19.1266755	root (UID1)	5656.0	56.0	24.0	56.0	0.0	0.0	0.0	0.0	0.0	0.0	0.0	0.0
CL0248	247	10	62226	52.38003406936007	52.73679795175507	53.99223946784922	3.4059522293501105	4.280090395220647	4.0850789	4.1826665	0.7002150003466721	root (UID1)	5656.0	56.0	24.0	56.0	0.0	0.0	0.0	0.0	0.0	0.0	0.0	0.0
CL0261	260	9	58760	40.263784887678696	42.04797320076854	41.111111111111114	2.6971105705128053	34.453609039874074	38.69959788888888	37.604098	6.144973027087543	root (UID1)	5656.0	56.0	24.0	56.0	0.0	0.0	0.0	0.0	0.0	0.0	0.0	0.0
CL0273	272	4	55210	40.69552617279479	37.60010978737185	36.342815175268704	2.7234115521937663	42.90411310561493	142.7338965	95.4077345	144.60624744380644	root (UID1)	5656.0	56.0	24.0	56.0	0.0	0.0	0.0	0.0	0.0	0.0	0.0	0.0
CL0276	275	5	53884	44.94655185212679	44.271476441200754	44.81775141178484	1.7101068231573469	3.9980750434637375	3.9189324	4.01421	0.1911596198119258	root (UID1)	5656.0	56.0	24.0	56.0	0.0	0.0	0.0	0.0	0.0	0.0	0.0	0.0
CL0277	276	14	53550	57.23809523809525	55.946368170363925	56.086990340375564	3.8473378773231888	3.3613251964519137	3.136957928571429	3.2160255	0.4974334874060285	root (UID1)	5656.0	56.0	24.0	56.0	0.0	0.0	0.0	0.0	0.0	0.0	0.0	0.0
CL0272	271	6	55278	40.94757408010421	40.87978557770159	42.307696082324426	4.486674983585849	57.64403874188646	42.1206925	42.18618650000001	26.715896959017854	root (UID1)	5656.0	56.0	24.0	56.0	0.0	0.0	0.0	0.0	0.0	0.0	0.0	0.0
CL0270	269	3	55352	43.36609336609337	44.06683971564371	43.280839895013116	1.3048319990726391	4.3962096047839285	4.2240926666666665	4.156655000000001	0.2178501856847702	root (UID1)	5656.0	56.0	24.0	56.0	0.0	0.0	0.0	0.0	0.0	0.0	0.0	0.0
CL0278	277	5	53463	40.048257673531225	40.13856633414476	40.37977268086844	1.871560338168	62.83841842534088	50.9159706	65.111846	25.563998272903422	root (UID1)	5656.0	56.0	24.0	56.0	0.0	0.0	0.0	0.0	0.0	0.0	0.0	0.0
CL0268	267	4	55509	50.94849483867481	54.07322996151488	54.22285274598442	2.3832239072425065	180.58683703577802	62.37177300000001	26.8055705	76.52207376953406	root (UID1)	5656.0	56.0	24.0	56.0	0.0	0.0	0.0	0.0	0.0	0.0	0.0	0.0
CL0267	266	8	55878	53.35552453559541	53.32983306296514	53.378478611143635	1.3809693706250208	4.106674351408425	4.128587250000002	4.205289499999999	0.41334745103204334	root (UID1)	5656.0	56.0	24.0	56.0	0.0	0.0	0.0	0.0	0.0	0.0	0.0	0.0
CL0266	265	5	57448	40.61586130065451	40.96121795087103	40.39444850255661	1.2078241201065072	455.7658408396637	356.1861146	512.032784	238.58240949836886	root (UID1)	5656.0	56.0	24.0	56.0	0.0	0.0	0.0	0.0	0.0	0.0	0.0	0.0
CL0264	263	7	58025	41.4286945282206	42.66434898226913	41.89215307305759	5.014157356417595	66.25872140430849	78.08973714285716	41.617284000000005	56.73731684426296	root (UID1)	5656.0	56.0	24.0	56.0	0.0	0.0	0.0	0.0	0.0	0.0	0.0	0.0
CL0279	278	2	53448	45.698622960634644	43.66965036330201	43.66965036330201	2.1459715712635834	8.770429887610389	7.1141995	7.1141995	1.7517355	root (UID1)	5656.0	56.0	24.0	56.0	0.0	0.0	0.0	0.0	0.0	0.0	0.0	0.0
CL0262	261	9	58264	50.31408760126322	50.451358378483256	48.78774989366227	5.225296587529399	50.78878295479198	57.72611522222223	49.220696000000004	36.38345440069249	root (UID1)	5656.0	56.0	24.0	56.0	0.0	0.0	0.0	0.0	0.0	0.0	0.0	0.0
CL0280	279	5	53441	41.664639508991215	40.878797851980075	36.915034848987716	6.295809815783177	85.20614991448514	284.8716768000001	41.799484	492.23831875759566	root (UID1)	5656.0	56.0	24.0	56.0	0.0	0.0	0.0	0.0	0.0	0.0	0.0	0.0
CL0281	280	5	53231	41.9642689410306	41.721308498677615	42.77156261277517	2.1919202644838816	6.169427604497379	4.7960958	3.577125	1.898567373045413	root (UID1)	5656.0	56.0	24.0	56.0	0.0	0.0	0.0	0.0	0.0	0.0	0.0	0.0
CL0249	248	7	61233	50.79940554929532	50.180752996019926	51.4226914817466	1.9176778029370385	3.9580003815099705	3.780422285714285	3.767553	0.5785722252408977	root (UID1)	5656.0	56.0	24.0	56.0	0.0	0.0	0.0	0.0	0.0	0.0	0.0	0.0
CL0282	281	2	52897	40.32553831030115	37.363508997871755	37.363508997871755	3.0806013357892503	33.35457045993156	19.022147	19.022147	14.906159999999998	root (UID1)	5656.0	56.0	24.0	56.0	0.0	0.0	0.0	0.0	0.0	0.0	0.0	0.0
CL0283	282	2	52877	44.569472549501675	44.746716152324524	44.746716152324524	0.9568259302157572	20.996163207954304	21.1566035	21.1566035	0.8661154999999994	root (UID1)	5656.0	56.0	24.0	56.0	0.0	0.0	0.0	0.0	0.0	0.0	0.0	0.0
CL0257	256	7	59955	40.038362104912025	42.030954968080636	40.366443881078595	4.875854089810912	98.82281240894005	261.00870114285715	70.32928000000001	322.2744760720824	root (UID1)	5656.0	56.0	24.0	56.0	0.0	0.0	0.0	0.0	0.0	0.0	0.0	0.0
CL0256	255	9	59970	56.439886609971644	55.79725394582361	54.749386610585354	2.747509773994956	12.302320089911625	10.402771222222222	10.760496	3.0426207512315866	root (UID1)	5656.0	56.0	24.0	56.0	0.0	0.0	0.0	0.0	0.0	0.0	0.0	0.0
CL0255	254	6	60641	46.239343018749686	45.48307156390968	45.26101681872507	1.206010292460618	4.7565142250622525	4.4174335000000005	4.7228910000000015	0.6108156718977638	root (UID1)	5656.0	56.0	24.0	56.0	0.0	0.0	0.0	0.0	0.0	0.0	0.0	0.0
CL0284	283	7	52529	47.15680862000038	45.68272317814028	47.090594109854266	5.179793523896489	12.094888808600965	11.883874428571428	8.677303	7.495776559918275	root (UID1)	5656.0	56.0	24.0	56.0	0.0	0.0	0.0	0.0	0.0	0.0	0.0	0.0
CL0285	284	2	52329	44.75529820940587	43.67156575955418	43.67156575955418	1.1951409953065273	9.16656351011867	7.894263	7.894263	1.4030939999999998	root (UID1)	5656.0	56.0	24.0	56.0	0.0	0.0	0.0	0.0	0.0	0.0	0.0	0.0
CL0254	253	2	60686	38.3811752298718	38.268101978404616	38.268101978404616	0.30721540734855424	8.246399898427974	7.565689999999999	7.565689999999999	1.849461	root (UID1)	5656.0	56.0	24.0	56.0	0.0	0.0	0.0	0.0	0.0	0.0	0.0	0.0
CL0253	252	7	60800	48.97861842105264	48.051008024397014	48.29001367989056	3.14431281760284	14.698589327286186	30.358865	17.219867	40.07400727757811	root (UID1)	5656.0	56.0	24.0	56.0	0.0	0.0	0.0	0.0	0.0	0.0	0.0	0.0
CL0286	285	4	51811	48.41249927621548	47.61275529843334	48.12065869954882	1.4471591786824718	22.479099559437188	19.342708	20.704909	4.21380316866201	root (UID1)	5656.0	56.0	24.0	56.0	0.0	0.0	0.0	0.0	0.0	0.0	0.0	0.0
CL0287	286	7	51640	52.89891556932611	55.17813487114639	55.54459109411619	4.6066142478277525	28.091395318261036	29.659612	29.600340999999997	4.833196567176367	root (UID1)	5656.0	56.0	24.0	56.0	0.0	0.0	0.0	0.0	0.0	0.0	0.0	0.0
CL0274	273	4	54680	45.687637161667894	42.163797462466256	42.76978627795428	4.4883453236636734	5.914907576591077	11.21784575	5.6293985000000015	10.30003953006362	root (UID1)	5656.0	56.0	24.0	56.0	0.0	0.0	0.0	0.0	0.0	0.0	0.0	0.0
CL0250	249	5	61080	62.23477406679764	63.207236190425604	63.228638046907136	2.4194965314578423	7.338603434250164	7.583297400000001	6.636353	2.9946556876127577	root (UID1)	5656.0	56.0	24.0	56.0	0.0	0.0	0.0	0.0	0.0	0.0	0.0	0.0
CL0269	268	6	55391	43.86091603329061	43.66115223125936	44.22956865505265	2.4079656057259733	73.99917296605949	72.33385666666669	59.680467500000006	40.440172476386756	root (UID1)	5656.0	56.0	24.0	56.0	0.0	0.0	0.0	0.0	0.0	0.0	0.0	0.0
CL0149	148	1	122725	43.78569973518028	43.78569973518028	43.78569973518028	0.0	45.340165	45.340165	45.340165	0.0	root (UID1)	5656.0	56.0	24.0	56.0	0.0	0.0	0.0	0.0	0.0	0.0	0.0	0.0
CL0226	225	10	68890	56.706343446073454	56.66235895097951	56.326485156153076	1.678271739593861	30.68069697642619	30.090490399999997	24.7602595	10.150974802528754	root (UID1)	5656.0	56.0	24.0	56.0	0.0	0.0	0.0	0.0	0.0	0.0	0.0	0.0
CL0144	143	5	131051	42.05080464857193	39.64969167418557	43.28208860183753	6.206682179433702	11.808252739948573	12.3125064	13.08825	2.768096902726535	root (UID1)	5656.0	56.0	24.0	56.0	0.0	0.0	0.0	0.0	0.0	0.0	0.0	0.0
CL0171	170	13	98537	47.346681957031365	48.33607804784015	50.026464361326745	4.8913655743163	14.857414950353675	17.26997192307692	14.12274	11.216177388595721	root (UID1)	5656.0	56.0	24.0	56.0	0.0	0.0	0.0	0.0	0.0	0.0	0.0	0.0
CL0170	169	2	98842	42.93620121001194	43.47583138609139	43.47583138609139	0.6258286697334903	46.69953313812954	47.6412865	47.6412865	1.0921854999999994	root (UID1)	5656.0	56.0	24.0	56.0	0.0	0.0	0.0	0.0	0.0	0.0	0.0	0.0
CL0169	168	5	99315	36.46276997432412	35.412836967914636	36.608713900592434	2.458391141096504	42.611710514111664	32.587031	32.5	14.236090882467195	root (UID1)	5656.0	56.0	24.0	56.0	0.0	0.0	0.0	0.0	0.0	0.0	0.0	0.0
CL0168	167	12	99343	47.4799432270014	46.393060624643574	47.2441866901892	3.458043088212796	5.075350188025326	4.9255751666666665	4.960694	1.014156206639197	root (UID1)	5656.0	56.0	24.0	56.0	0.0	0.0	0.0	0.0	0.0	0.0	0.0	0.0
CL0167	166	4	101969	41.75975051241063	38.809609332849824	39.144783373356326	4.013557805123447	21.962567037972327	27.8441455	24.6157715	8.318928415772142	root (UID1)	5656.0	56.0	24.0	56.0	0.0	0.0	0.0	0.0	0.0	0.0	0.0	0.0
CL0166	165	3	102095	56.676624712277786	56.38924572529026	54.98792494891325	2.4099185848747537	5.488207164621186	5.193916333333333	4.691293	1.0857578366174578	root (UID1)	5656.0	56.0	24.0	56.0	0.0	0.0	0.0	0.0	0.0	0.0	0.0	0.0
CL0164	163	4	103844	41.2551519587073	40.246788997052285	40.69270766839642	1.4970818438024278	26.91999012698856	18.7028125	20.9223305	8.814756037124072	root (UID1)	5656.0	56.0	24.0	56.0	0.0	0.0	0.0	0.0	0.0	0.0	0.0	0.0
CL0161	160	3	107377	38.72244521638712	42.747668409571155	40.56	4.571853000771252	49.5637362971493	68.22548166666667	48.904012	56.04531976897726	root (UID1)	5656.0	56.0	24.0	56.0	0.0	0.0	0.0	0.0	0.0	0.0	0.0	0.0
CL0160	159	8	107641	38.06820821062606	37.12097379837662	38.61274103255235	3.793472179137685	45.37861610432827	42.8517015	49.437483	24.228581245200587	root (UID1)	5656.0	56.0	24.0	56.0	0.0	0.0	0.0	0.0	0.0	0.0	0.0	0.0
CL0159	158	4	109803	35.56460206005301	34.42001182458433	34.55189466455407	3.771874181227478	31.59724098787829	28.67152675	27.540629000000006	8.11333599905225	root (UID1)	5656.0	56.0	24.0	56.0	0.0	0.0	0.0	0.0	0.0	0.0	0.0	0.0
CL0157	156	7	115021	42.848697194425355	41.79405835473496	42.7655601659751	2.7457791220423644	247.37047282690992	113.89261457142858	37.374815999999996	183.0595633277303	root (UID1)	5656.0	56.0	24.0	56.0	0.0	0.0	0.0	0.0	0.0	0.0	0.0	0.0
CL0155	154	4	115785	43.84592131968735	41.21060877796805	40.559190828944494	1.907254201491884	60.40968237402946	118.3651475	131.41427050000001	49.26509112310118	root (UID1)	5656.0	56.0	24.0	56.0	0.0	0.0	0.0	0.0	0.0	0.0	0.0	0.0
CL0151	150	11	119335	39.2282230695102	38.728467176651904	38.04561326931471	3.847196758831116	80.18761274581641	75.25742445454544	86.243875	31.676549434321714	root (UID1)	5656.0	56.0	24.0	56.0	0.0	0.0	0.0	0.0	0.0	0.0	0.0	0.0
CL0145	144	24	130866	56.96819647578439	56.13735974840004	56.43239783179131	2.46854984168118	3.629712280622927	3.4862903333333333	3.5191795	0.4476123747521087	root (UID1)	5656.0	56.0	24.0	56.0	0.0	0.0	0.0	0.0	0.0	0.0	0.0	0.0
CL0142	141	16	135220	44.31223191835527	44.23534060394992	44.224259948429825	5.2781159350940445	44.4640328434773	47.13271468750001	41.917148	17.99509920954747	root (UID1)	5656.0	56.0	24.0	56.0	0.0	0.0	0.0	0.0	0.0	0.0	0.0	0.0
CL0225	224	3	68937	40.55441925236085	40.513475477097145	40.58213959158793	0.1725516354339995	19.24752559397711	17.856254666666672	19.104416	2.4007993413890762	root (UID1)	5656.0	56.0	24.0	56.0	0.0	0.0	0.0	0.0	0.0	0.0	0.0	0.0
CL0141	140	6	137753	40.37879392826291	40.14324801248704	40.76550295841325	1.4852044949195962	19.792225936335328	20.397551999999997	20.4953095	5.965278968581632	root (UID1)	5656.0	56.0	24.0	56.0	0.0	0.0	0.0	0.0	0.0	0.0	0.0	0.0
CL0140	139	3	142005	43.66747649730643	43.87364916523776	45.194516487588	2.404976498343256	8.136131135016372	8.231210666666668	8.998386	1.230337704290258	root (UID1)	5656.0	56.0	24.0	56.0	0.0	0.0	0.0	0.0	0.0	0.0	0.0	0.0
CL0138	137	16	151512	50.74449548550611	51.30047220259087	52.39443450060917	3.9089525768888267	4.848672487611543	4.4457698125	4.2405625	0.9036553405943288	root (UID1)	5656.0	56.0	24.0	56.0	0.0	0.0	0.0	0.0	0.0	0.0	0.0	0.0
CL0137	136	12	154319	41.13038575936858	40.82648892271376	41.099432766099426	3.03617979084852	50.938963998392936	47.19533083333334	39.483084999999996	18.062213739470874	root (UID1)	5656.0	56.0	24.0	56.0	0.0	0.0	0.0	0.0	0.0	0.0	0.0	0.0
CL0134	133	1	172638	33.41674486497758	33.41674486497758	33.41674486497758	0.0	27.027315	27.027315	27.027315	0.0	root (UID1)	5656.0	56.0	24.0	56.0	0.0	0.0	0.0	0.0	0.0	0.0	0.0	0.0
CL0133	132	9	174544	42.7433770281419	40.337009845653725	38.887642969275625	5.2938921068287215	34.51812394605372	375.9115904444445	158.148158	638.4476523551208	root (UID1)	5656.0	56.0	24.0	56.0	0.0	0.0	0.0	0.0	0.0	0.0	0.0	0.0
CL0132	131	22	175923	56.23255628883091	56.036211314365225	56.293910835796076	1.8344795678447503	3.770142149178902	3.792651727272728	3.69564	0.6970266180407891	root (UID1)	5656.0	56.0	24.0	56.0	0.0	0.0	0.0	0.0	0.0	0.0	0.0	0.0
CL0130	129	3	207248	41.87736431714661	40.42936291287052	41.34024346149211	1.9410832846764825	14.953197188247895	15.246937666666668	14.958012	1.5294616947641717	root (UID1)	5656.0	56.0	24.0	56.0	0.0	0.0	0.0	0.0	0.0	0.0	0.0	0.0
CL0128	127	45	213679	58.91500802605778	59.396412237072866	60.94740768370011	4.735713725239852	4.535069842239996	4.3108276666666665	3.892696	1.662089923003098	root (UID1)	5656.0	56.0	24.0	56.0	0.0	0.0	0.0	0.0	0.0	0.0	0.0	0.0
CL0126	125	7	217005	40.81703186562522	40.548175260775686	40.561942335157454	1.5299857670685588	11.14815515352181	57.970567285714296	6.781472	125.5161974662212	root (UID1)	5656.0	56.0	24.0	56.0	0.0	0.0	0.0	0.0	0.0	0.0	0.0	0.0
CL0124	123	12	222381	33.56221979395722	44.34704630581804	44.68843432795558	5.02380221579456	162.50680597920692	643.0860378333333	549.4165820000001	534.7597627942062	root (UID1)	5656.0	56.0	24.0	56.0	0.0	0.0	0.0	0.0	0.0	0.0	0.0	0.0
CL0123	122	15	227389	43.09091468804559	39.80629348752095	39.79435236341314	4.183999111872914	385.40182023020463	207.0158636	36.822153	507.83059317748	root (UID1)	5656.0	56.0	24.0	56.0	0.0	0.0	0.0	0.0	0.0	0.0	0.0	0.0
CL0118	117	10	295277	42.125190922422	43.38276330573616	44.25674109939715	3.5216239069223767	302.6190657822858	104.3802196	43.624008	158.01860186456238	root (UID1)	5656.0	56.0	24.0	56.0	0.0	0.0	0.0	0.0	0.0	0.0	0.0	0.0
CL0117	116	8	328631	41.50186683544766	41.52817305866971	41.500712038149906	0.715681799922774	7.055376076818679	7.254856125	7.1404825	0.9158616821987148	root (UID1)	5656.0	56.0	24.0	56.0	0.0	0.0	0.0	0.0	0.0	0.0	0.0	0.0
CL0172	171	3	98027	40.85099003335815	35.548166189865825	32.7286663260092	4.134500545000592	55.690292957481105	381.8709136666666	308.07325099999997	332.040122246927	root (UID1)	5656.0	56.0	24.0	56.0	0.0	0.0	0.0	0.0	0.0	0.0	0.0	0.0
CL0173	172	2	97837	29.31712951133007	31.01664477552071	31.01664477552071	1.7927854798820422	41.811798963745815	23.016063	23.016063	19.827255	root (UID1)	5656.0	56.0	24.0	56.0	0.0	0.0	0.0	0.0	0.0	0.0	0.0	0.0
CL0174	173	10	97813	50.78159344872358	49.63359761498757	50.22151496677692	2.368968231797581	20.686690368131032	18.3561242	20.315607500000002	6.4375173607382346	root (UID1)	5656.0	56.0	24.0	56.0	0.0	0.0	0.0	0.0	0.0	0.0	0.0	0.0
CL0175	174	7	97721	45.83149988231803	44.060646417880506	45.20755990550118	4.312027284762518	6.5947521501519635	12.662279714285715	4.895649	19.955200471815445	root (UID1)	5656.0	56.0	24.0	56.0	0.0	0.0	0.0	0.0	0.0	0.0	0.0	0.0
CL0224	223	7	68988	40.817243578593384	41.240550093866986	42.73255813953488	2.9095017124658216	34.705687122803965	41.23640771428571	50.19678	16.25055719928118	root (UID1)	5656.0	56.0	24.0	56.0	0.0	0.0	0.0	0.0	0.0	0.0	0.0	0.0
CL0221	220	4	69682	42.23041818547114	39.08439664970337	41.85403143386875	6.296392956803883	85.86567857821245	60.28366925	56.6332015	43.067014662495424	root (UID1)	5656.0	56.0	24.0	56.0	0.0	0.0	0.0	0.0	0.0	0.0	0.0	0.0
CL0219	218	15	70926	60.01466317006457	59.4334001855748	59.54328035796946	3.8440489961474977	4.179476271536531	4.0290102	4.110618	0.6214730143486736	root (UID1)	5656.0	56.0	24.0	56.0	0.0	0.0	0.0	0.0	0.0	0.0	0.0	0.0
CL0217	216	5	70997	44.584982464047776	45.221162801568106	46.407185628742525	2.0480969394274435	60.440473357860206	63.6993152	65.165188	8.91874261716095	root (UID1)	5656.0	56.0	24.0	56.0	0.0	0.0	0.0	0.0	0.0	0.0	0.0	0.0
CL0215	214	5	71739	44.68280851419729	46.87878897471028	44.79860549087966	7.0925710835994975	33.03720779552267	80.990948	46.225755	83.27986135182503	root (UID1)	5656.0	56.0	24.0	56.0	0.0	0.0	0.0	0.0	0.0	0.0	0.0	0.0
CL0213	212	5	71928	42.38961183405628	41.424830422118895	40.75652637187	1.5285365729828817	31.580094557349014	47.7510076	49.19688	22.486230666178717	root (UID1)	5656.0	56.0	24.0	56.0	0.0	0.0	0.0	0.0	0.0	0.0	0.0	0.0
CL0212	211	6	72191	41.64230998323891	42.097488666788934	41.271249224624746	3.3221679322788584	54.811245444778436	71.17115816666667	71.12459799999998	17.932989052360295	root (UID1)	5656.0	56.0	24.0	56.0	0.0	0.0	0.0	0.0	0.0	0.0	0.0	0.0
CL0209	208	5	72839	36.66030560551353	38.265042342188266	37.839183470251434	2.416534128938584	26.95198932575955	39.485125399999994	38.483678999999995	13.416878039953165	root (UID1)	5656.0	56.0	24.0	56.0	0.0	0.0	0.0	0.0	0.0	0.0	0.0	0.0
CL0208	207	5	73097	54.764217409743225	54.74642255423864	54.84078534895232	4.007789053608584	161.1726074036007	68.07570700000001	32.685345	61.13791584704317	root (UID1)	5656.0	56.0	24.0	56.0	0.0	0.0	0.0	0.0	0.0	0.0	0.0	0.0
CL0207	206	5	73309	40.256994366312455	43.328855114559545	44.556113902847564	3.3773263168404	17.40385286188599	19.6395756	21.127284	3.0432673816080373	root (UID1)	5656.0	56.0	24.0	56.0	0.0	0.0	0.0	0.0	0.0	0.0	0.0	0.0
CL0206	205	7	73382	40.04524270257011	37.240675984338544	40.53415388800109	5.267803398829125	88.82164909510506	100.64926014285713	16.119875	187.72347582896649	root (UID1)	5656.0	56.0	24.0	56.0	0.0	0.0	0.0	0.0	0.0	0.0	0.0	0.0
CL0205	204	6	73460	42.003811598148644	39.255360153044464	40.91981104773429	7.0086211041806825	81.69228619023959	71.33428766666667	27.296435	109.03347454190063	root (UID1)	5656.0	56.0	24.0	56.0	0.0	0.0	0.0	0.0	0.0	0.0	0.0	0.0
CL0203	202	7	75019	43.84889161412442	42.79589974441446	43.84715025906736	2.2801522185809264	94.50289781613992	71.44707642857142	94.402733	42.30545413405433	root (UID1)	5656.0	56.0	24.0	56.0	0.0	0.0	0.0	0.0	0.0	0.0	0.0	0.0
CL0200	199	5	76040	59.03866386112573	59.02356197125877	58.0441290608715	1.4128116245588418	5.298760218897949	5.540065200000001	4.814712	2.021342875756155	root (UID1)	5656.0	56.0	24.0	56.0	0.0	0.0	0.0	0.0	0.0	0.0	0.0	0.0
CL0199	198	3	76831	45.3697075399253	44.77048831387852	44.58971088435374	1.7124710324799322	6.661378475328967	6.4117766666666665	6.754039	0.5113943311277078	root (UID1)	5656.0	56.0	24.0	56.0	0.0	0.0	0.0	0.0	0.0	0.0	0.0	0.0
CL0197	196	3	79187	59.23573313801508	54.331529944195225	60.40828441395686	10.799847298242492	6.4984150311162185	7.1037050000000015	6.22187	1.353297970342329	root (UID1)	5656.0	56.0	24.0	56.0	0.0	0.0	0.0	0.0	0.0	0.0	0.0	0.0
CL0196	195	7	79975	56.24632697718037	56.65925019587455	56.135902636916846	1.4703049294027442	30.51222355322288	29.892454999999998	27.453215000000004	7.508855665617897	root (UID1)	5656.0	56.0	24.0	56.0	0.0	0.0	0.0	0.0	0.0	0.0	0.0	0.0
CL0195	194	2	80094	37.19754288710765	37.09368381516761	37.09368381516761	0.1073824453045944	33.18750104022773	32.9676615	32.9676615	0.2272974999999988	root (UID1)	5656.0	56.0	24.0	56.0	0.0	0.0	0.0	0.0	0.0	0.0	0.0	0.0
CL0194	193	5	80992	42.056005531410506	42.609917210971744	42.175747569253346	1.8471173306431623	23.24257299008544	23.8245282	23.732544	3.31941755647369	root (UID1)	5656.0	56.0	24.0	56.0	0.0	0.0	0.0	0.0	0.0	0.0	0.0	0.0
CL0193	192	8	83065	53.07891410341299	53.28318395645415	53.3331345176049	0.8708386244606895	4.424551474447722	4.340928	4.204541000000001	0.6299825990809191	root (UID1)	5656.0	56.0	24.0	56.0	0.0	0.0	0.0	0.0	0.0	0.0	0.0	0.0
CL0190	189	4	83939	38.65783485626467	40.303271730957015	39.559087321541284	2.70208243476286	38.98762237654725	46.709195750000006	42.7502365	12.324825883058017	root (UID1)	5656.0	56.0	24.0	56.0	0.0	0.0	0.0	0.0	0.0	0.0	0.0	0.0
CL0189	188	6	84538	40.33807281932385	42.351706702492315	42.95492619808654	3.492808642020376	184.87492504367265	94.0885575	35.168089	124.34516645897287	root (UID1)	5656.0	56.0	24.0	56.0	0.0	0.0	0.0	0.0	0.0	0.0	0.0	0.0
CL0186	185	12	86702	55.21325920970681	54.79224312611347	54.8859530777411	1.386612430966316	4.0347693363244215	3.984406	3.9072435	0.4289690928788849	root (UID1)	5656.0	56.0	24.0	56.0	0.0	0.0	0.0	0.0	0.0	0.0	0.0	0.0
CL0184	183	4	88271	44.01445548368093	42.62187288100243	43.60958000177521	5.062615574951611	132.02114373755822	249.85396725	272.87491800000004	156.90609423099738	root (UID1)	5656.0	56.0	24.0	56.0	0.0	0.0	0.0	0.0	0.0	0.0	0.0	0.0
CL0182	181	3	89715	44.34041130245778	50.67806362231554	54.1967022951363	5.765126924733923	73.436447525163	139.82445533333333	138.895916	76.49375096296885	root (UID1)	5656.0	56.0	24.0	56.0	0.0	0.0	0.0	0.0	0.0	0.0	0.0	0.0
CL0180	179	4	93090	42.371898163067996	41.981483495693496	42.2085385508429	2.8027408641027605	48.06172623764099	26.516659000000004	19.567462	20.44155215521721	root (UID1)	5656.0	56.0	24.0	56.0	0.0	0.0	0.0	0.0	0.0	0.0	0.0	0.0
CL0179	178	3	93780	47.937726594156544	51.34234207969803	52.464105549088096	2.8148456996702604	16.069143375901046	10.777333	10.934956	5.085458774318465	root (UID1)	5656.0	56.0	24.0	56.0	0.0	0.0	0.0	0.0	0.0	0.0	0.0	0.0
CL0178	177	3	94894	43.657133222332284	59.60699543183461	67.36276849642005	11.856069313970337	13.419219144940673	8.739803333333334	7.554272999999999	3.6310697859318113	root (UID1)	5656.0	56.0	24.0	56.0	0.0	0.0	0.0	0.0	0.0	0.0	0.0	0.0
CL0177	176	2	95692	44.00263344898215	44.01855151725167	44.01855151725167	0.18530800350926668	6.289903456297287	6.30666	6.30666	0.19506900000000016	root (UID1)	5656.0	56.0	24.0	56.0	0.0	0.0	0.0	0.0	0.0	0.0	0.0	0.0
CL0296	295	5	50315	52.155420848653485	50.723513733062006	50.75370919881307	2.654888584522338	498.0183809249527	321.2651004	304.311532	184.01010545777007	root (UID1)	5656.0	56.0	24.0	56.0	0.0	0.0	0.0	0.0	0.0	0.0	0.0	0.0
CL0297	296	9	49664	55.17678801546393	55.48577722086791	55.32167210198637	2.4333510275475967	3.7983390235381767	3.4621425555555563	3.4330230000000004	0.6249002797903236
CL0298	297	5	49501	61.79471121795519	61.46958751599657	61.17123287671233	1.7034576287188452	4.3112586283913465	4.1528402	4.293871	0.3979210543398779
CL0299	298	4	49471	36.56081340583371	35.03651716453944	34.03148569120414	1.8538973866955637	70.01103267578985	53.71221575000001	66.68073299999999	26.0613253474562
CL0300	299	2	49416	48.041120284927956	49.56633536625269	49.56633536625269	1.5919657920484696	18.003232896713616	13.268305000000002	13.268305000000002	4.942151
CL0301	300	8	49385	46.20228814417332	46.18239587097258	46.861069783738145	3.4957874431396445	4.389873481482232	4.1411904999999996	4.172179	0.7949628321734609
CL0302	301	5	49367	45.40279944092208	51.15063586422293	54.43371378402107	5.80121935911199	13.04798890554419	13.541206200000001	13.466964	5.456924999704848
CL0303	302	5	49232	39.16152096197595	39.144628391088965	40.23920265780731	2.159299253292532	64.71048367358628	55.732915399999996	74.802726	36.73877758781184
CL0304	303	4	48974	63.901253726467104	64.29221615077076	64.69242738746382	2.2256613922274178	5.668661994405196	5.6518835	5.5362045	0.3040996971097637
CL0305	304	12	48970	52.98141719420053	53.110881144804885	53.23065758626496	2.7325329540111563	3.776642239289361	3.8144337499999987	3.85164	0.3902145458125407
CL0306	305	7	48894	52.088190780054816	51.89851662145912	52.20211319175646	1.1691377708288375	53.70205919141408	56.60070471428572	51.922340000000005	48.67625510307742
CL0307	306	10	48710	58.30424964073086	58.03078127676487	58.473910608453465	2.750744341777295	4.048891947587764	3.9352888	3.8521754999999995	0.5528129143576149
CL0308	307	6	48681	50.789835870257384	51.013042103639144	50.01684785026349	2.981922815534584	27.197674365358147	34.03001583333333	26.892628	14.453139576157426
CL0309	308	5	48599	50.53807691516286	50.76697463222826	50.773505083033406	0.4628907961701079	3.9669251415255458	3.7822292	3.9176279999999997	1.0096654759345591
CL0310	309	3	48403	39.27442513893767	37.56521452472649	42.1292083712466	7.1407441820217095	40.51824975470529	27.184908333333336	14.594853	22.793052992115893
CL0311	310	13	48376	58.71093104018522	57.513166018815724	56.46655922643029	2.5876084683899507	11.151888422275507	6.162356076923076	3.81236	8.82510340304082
CL0312	311	5	48065	50.252782690107146	51.301552110557424	50.62034739454094	3.011517924311774	4.33246134592739	4.4975825999999985	4.403832	0.5130676296889525
CL0313	312	2	47997	44.91530720670042	41.50306706221127	41.50306706221127	3.9849458676621228	10.785615813884199	13.6246035	13.6246035	3.3154795000000004
CL0314	313	5	47996	46.67055587965664	45.962414881406524	47.58731408838943	3.3330399257158816	91.66937497510212	37.18142540000001	9.446753	47.272496940692946
CL0315	314	2	47789	37.61535081294858	40.760240701939566	40.760240701939566	3.612333683571436	28.90379822946703	46.423232	46.423232	20.123452
CL0316	315	3	47511	49.317000273620856	49.214349418463364	49.18322295805739	0.3549467516191149	5.675898205657637	5.7956856666666665	6.036354	0.5499097661788604
CL0317	316	4	47423	39.26153975918857	41.79362982216471	42.195414208203495	3.1898911177198466	58.52620203034393	68.2995655	75.46602850000001	39.50356916837307
CL0318	317	11	47355	62.83602576285504	62.911159938726385	63.31034482758621	1.7268552076125452	4.1030173099567095	4.124269181818182	4.100543	0.2924339989240209
CL0319	318	7	46545	61.918573423568596	59.878093288407506	61.94214876033058	5.193454890929082	3.8206773069287774	3.513889	3.864632	0.7306610422780576
CL0320	319	6	46533	43.21879096555133	43.25563198556344	45.0037484729677	3.671734171910338	9.178294559946703	7.5999601666666665	5.782244	5.43607704113691
CL0321	320	10	46328	53.954412018649634	54.23732952508317	54.573622456754045	2.55899846527249	3.8457689139829045	3.914388999999999	3.792664	0.4820201857335437
CL0322	321	7	46226	46.556050707394114	46.78668864146391	48.81087202718007	3.1972455343868984	11.439050144485787	12.799839571428572	12.290767	3.893988659458792
CL0323	322	6	45942	37.34926646641417	42.090895386910056	39.90750481029075	6.2083732880067455	47.198507977341	17.999599333333332	9.309758	20.417891353332106
CL0324	323	2	45541	45.56773017720296	46.58355702979299	46.58355702979299	1.7606763346832786	5.993135313036604	6.355626	6.355626	0.628285
CL0325	324	5	45502	36.2071996835304	36.82640772242571	36.9885665690258	4.7667623470740725	77.51389905733814	95.81452220000001	74.657664	70.77895942976507
CL0326	325	5	45480	37.930958663148644	39.205853736792896	36.84179033030158	5.601028055346447	21.126678305057172	24.4666566	27.270138	7.563828923931254
CL0327	326	3	45392	41.670338385618614	41.572573791777174	41.987179487179496	1.052834761435121	8.269005087372225	7.419046333333334	6.902678	1.3233222220503302
CL0328	327	5	45388	37.606856437824966	36.161766547666495	36.83039393439921	2.542799381453781	62.08616427225258	63.9862718	63.357983999999995	3.996200928565902
CL0329	328	3	45337	51.148068906191405	50.872783590039695	51.21951219512196	1.1638362027502387	3.778383024902397	3.800781666666667	3.7173519999999995	0.17835764391867895
CL0330	329	3	45263	40.73746768884077	39.444362853695175	40.22501814662473	1.8396453903742782	24.462868550714713	15.179363000000002	11.984644	10.469881293425155
CL0331	330	4	45145	46.72721231587109	46.83873124847554	46.53742334736897	0.6139149001785367	4.6636454987927785	4.68146475	4.727162	0.09441107504518467
CL0332	331	5	45133	48.69164469456939	48.117868772780284	50.12769062385991	4.044272205938623	15.472553113243078	14.736854000000001	16.518770999999997	5.540483945772714
CL0333	332	6	45055	51.235157030296314	50.843655540133454	51.31126651797005	1.5403383279244696	4.576367668671623	6.650960166666668	3.841632	6.579368603578751
CL0334	333	9	45023	57.28405481642715	56.33106226722455	57.25513905683192	3.4131908195974163	3.750131400373143	3.679716333333333	3.6744190000000003	0.3707614214277303
CL0335	334	6	44816	40.06604784005712	41.144947852826746	40.73371480415952	2.3404094598396603	58.74860853710728	50.09462883333334	40.993919	24.088371713859388
CL0336	335	2	44558	38.48467166389874	38.66910138517053	38.66910138517053	0.2393493190548241	7.08206701813367	6.711096	6.711096	0.4814390000000004
CL0337	336	10	44536	56.34542841746004	55.3027962109996	55.20335088407217	4.485656279699288	3.8198383542078322	3.7988823	3.8369025000000003	0.5467181133911789
CL0338	337	3	44375	40.9825352112676	41.47274989376049	42.258234983265815	2.0967104161045342	37.52179978783098	79.75335366666667	16.070792	96.02368808635401
CL0339	338	11	44131	57.90714010559471	58.27848357585803	58.142916493560456	5.286174330174856	3.9054937051958944	3.781437363636364	3.8557989999999998	0.5922053581913921
CL0340	339	7	44092	56.822099247028945	57.66066925528066	56.549011269402506	4.171862302447035	42.16851488381111	51.030838	38.225953999999994	37.71987761792347
CL0341	340	4	44052	50.74230454916916	50.44936251943878	50.97080218160677	1.427924447936981	4.309901803754654	4.29424725	4.3541170000000005	0.1740246658470792
CL0342	341	4	43992	46.48799781778504	48.96952267165066	49.08421757215801	3.244775545603758	8.442390898072377	11.494521249999998	7.554938000000001	7.731177145361478
CL0343	342	6	43967	41.83137353014761	42.80327208550757	42.55468852030822	1.551950370869286	74.1472461230923	103.1201245	16.401673000000002	148.31256305160983
CL0344	343	4	43726	39.62859625851896	39.32041307153783	39.15859120502055	1.1611987478522263	47.81861999048621	46.213029	57.184811	24.312043630242783
CL0345	344	9	43713	39.14167410152587	39.32543644767558	37.813564571074636	5.6560572158445135	170.24118512746782	240.06544277777783	181.090852	217.0659462877662
CL0346	345	3	43669	43.50454555863427	43.37959738189948	43.438983310365956	0.15008358636268934	14.135519799216835	30.469926	29.385142	20.348168792619415
CL0347	346	11	43612	53.409612033385315	52.70222136487818	54.11277806518366	4.0375198436077735	10.218327680248557	26.480937545454548	3.6630830000000003	72.67591626936036
CL0348	347	12	43546	49.570569053414786	50.087750960798104	49.98303540888549	4.429844384778651	183.93241963636154	187.90866016666664	169.2568915	114.05701821453792
CL0349	348	7	43481	42.20464110761022	43.59458138089057	46.79867986798679	6.567099541656556	100.80944566251928	142.88878014285714	160.070999	51.88938871400207
CL0350	349	7	43315	55.904421101235144	54.95995532368111	55.760643048526354	3.15621123511302	5.064635657462773	7.292025142857143	4.018418	9.147497602909496
CL0351	350	4	43270	48.65726831522995	47.77962209379097	48.136681920142095	1.160647751245033	13.233488472567599	14.54939075	13.661229999999998	2.1754480340467075
CL0352	351	10	42884	43.21425240182818	44.799784872305835	45.80802794764717	3.7390329840703727	121.19860839035532	106.12805320000001	33.4013835	128.63014248106722
CL0353	352	9	42817	43.326248919821566	49.41382879676578	49.59908361970218	6.439194973981903	14.738370077422518	14.087067333333332	15.778357000000002	4.749412423901577
CL0354	353	9	42798	49.36679284078695	48.942471862374745	48.30265848670757	1.7961323174241361	11.42563492544044	11.772902888888886	14.417635999999998	4.852338136443146
CL0355	354	8	42796	38.09234507897934	36.941299513170684	38.70358585734101	3.667513950963663	68.25778873118982	95.303968125	92.9454835	65.24281844629701
CL0356	355	5	42756	51.609130882215354	51.26827074019461	51.717197131714684	1.0893312559056372	12.68478030491627	14.299884400000002	13.554932999999998	5.547266841374968
CL0357	356	5	42483	43.72101781889226	42.050703305132295	41.955445544554465	4.207992158472512	44.18611163385354	38.306848200000005	33.008199	16.9944726991572
CL0358	357	5	42260	50.1561760530052	50.03033006827518	49.83208955223882	1.615228758610643	4.202106804969239	4.2132628	3.899398	0.5698674697069137
CL0359	358	2	41647	42.44003169496002	43.020938021192464	43.020938021192464	0.6516283504889415	56.9943410764761	58.95340699999999	58.95340699999999	2.197571
CL0360	359	4	41620	52.815953868332535	57.90508103700876	58.29247461381829	4.8371599445583655	7.562811984863046	5.0869955	4.107777	2.0333017377031744
CL0361	360	3	41567	43.77029855414151	43.82866223701967	43.961000198978574	0.4813928028390994	12.67802392323237	12.805525666666664	13.776132999999998	1.9341900361169848
CL0362	361	7	41550	45.35018050541515	45.08532668335845	47.74396642182581	5.1456640487344405	15.555004737906136	16.830083714285713	18.932986	10.047709795593104
CL0363	362	3	41541	43.04181411135986	42.79590932767463	42.39858296971529	1.1319121281701263	12.974283825834718	12.506776	12.833535000000001	1.0596826174759435
CL0364	363	4	41430	44.310885831523045	45.29043835307351	45.40887400751103	4.081556923336032	16.11711988629013	17.111819999999998	18.0541725	7.167448685870412
CL0365	364	4	41273	46.90717902745136	46.69300013690937	46.025751321781776	1.3975804564125964	5.390584650958254	5.39181825	5.3876125	0.3107431696766437
CL0366	365	2	41230	40.6015037593985	40.312622153398095	40.312622153398095	0.8702753628084849	17.068865158379822	16.731925	16.731925	1.0150550000000005
CL0367	366	4	41173	40.08452140966167	40.59784929154708	40.34333265641324	3.0390986340244157	83.97228065436086	196.09720575	165.2577405	144.94835718116008
CL0368	367	9	41066	49.42531534602835	48.79797793399729	48.46727423363711	1.7005718381734811	4.875988947596552	4.667325777777777	4.412614	1.171645740163788
CL0369	368	2	40917	45.72182711342474	44.92917541601904	44.92917541601904	0.8472330791449849	132.98744234054305	72.2226625	72.2226625	64.9489955
CL0370	369	5	40751	36.872714780005396	38.742076280735716	35.43200912768385	5.054563805417257	34.62487069136954	49.5281972	39.675247999999996	36.01854329404183
CL0371	370	6	40731	49.73116299624365	49.3868447564631	49.71534774196695	2.0601942224716443	11.358264515283198	13.5504385	15.8359095	5.6209891951453335
CL0372	371	11	40525	55.35101789019124	54.5624913331884	55.5045871559633	5.063854036412463	9.670974039457123	8.417618909090908	4.0157	10.725095561792193
CL0373	372	5	40510	38.546038015304866	39.63083576633257	40.940366972477065	3.054680175510964	47.21532580802271	51.0585146	60.329866	26.715292887646473
CL0374	373	3	40460	59.898665348492344	60.14425538103351	62.14592274678112	3.530670128523288	4.8392723055363325	4.666447333333333	4.552736	0.38758923801479456
CL0375	374	3	40331	41.999950410354316	42.75019595231489	43.02018529293291	2.3821388516281283	6.536528924797303	6.5887503333333335	6.572686999999999	0.08902028796603366
CL0376	375	3	40188	56.175972927241965	55.0721721737095	56.26316199984401	1.8249714671305577	28.46730310092565	30.36050633333333	29.636917999999998	4.5508008180416155
CL0377	376	6	40157	40.18726498493413	39.281840582281134	39.74980065112359	3.091415317965623	76.81202223572477	50.61304616666667	56.127166	38.16158587777125
CL0378	377	4	40086	39.876764955346005	42.08851724259252	42.76085946573751	1.7843178790952698	52.340153925460264	58.616464	60.757521	21.865574276764328
CL0379	378	3	39997	47.156036702752715	47.40795374383347	45.656110595821744	3.4949381562996717	19.458637427007027	19.295774666666667	17.572364999999998	7.052885992168611
CL0380	379	5	39864	52.12974111980735	49.509156965465316	52.693153266331656	7.039556269743429	4.621608646071644	4.0321764	4.406706	1.1507746056566597
CL0381	380	5	39774	43.81505506109519	43.98590736414015	43.43124001474746	2.1108221722205056	61.287754380675814	59.131584600000004	55.165682	10.812868300316632
CL0382	381	3	39659	41.998033233314	40.42601819801667	41.972206242998574	3.970884076131599	71.40644568844397	95.340034	72.217787	63.163712794750346
CL0383	382	6	39642	46.50875334241461	45.68767866628409	47.75032096356738	4.837501886894602	4.5689309729832	4.206459333333333	4.378764	0.9361960498798078
CL0384	383	2	39621	58.51694808308725	59.071586108146235	59.071586108146235	0.8231995950875515	4.802193645390071	5.0387615	5.0387615	0.3511165000000003
CL0385	384	7	39565	63.48793125236953	61.537092671195964	63.69189907038513	6.747867400425375	7.729238384784533	20.74781	3.816392	41.691269060686295
CL0386	385	4	39462	46.979372560944704	47.373175233592285	47.384532652750046	1.5402586318991371	25.84401209751153	10.206552	3.982542	11.186741833696372
CL0387	386	2	39330	38.19221967963386	38.5142573659217	38.5142573659217	0.8567195753314607	36.5007456610984	38.28133750000001	38.28133750000001	4.7369235
CL0388	387	3	39300	34.16539440203562	37.5405918772841	36.77269200930953	4.3114315389086695	24.70533907748091	28.07018166666667	26.836371999999997	20.767359005405194
CL0389	388	4	39298	33.543691790930836	33.567672192516625	34.161997186436054	3.153699437263662	9.395620759377069	11.725845500000002	9.30656	5.995770763872877
CL0390	389	6	39250	50.145222929936295	48.564862432193024	50.23126417343932	4.303790477672553	5.6837684055031845	5.833090333333334	5.514334	1.7690106684123068
CL0391	390	4	39214	55.064517774264296	59.48997373609144	61.74415698680332	4.13494044211771	6.171807214336718	6.52969025	6.5160865	1.1166941776319903
CL0392	391	2	39137	41.26785394894856	41.55409211728194	41.55409211728194	0.31537690926672823	11.68765896417712	20.5321715	20.5321715	9.7448745
CL0393	392	9	38943	52.7411858357086	51.61890546214839	55.7628979143798	7.836742158309	5.932620069023957	8.958145222222221	4.8893059999999995	10.941029789150052
CL0394	393	7	38932	49.91266824206309	50.16478776031022	50.50468637346792	1.6785500618380496	25.02929417448372	58.59129300000001	5.285608	132.48055309899047
CL0395	394	4	38890	46.62381074826433	49.00859244165829	46.351114845969384	6.540843379860588	6.915651764103884	5.90860675	4.1684095	3.5974126166488998
CL0396	395	6	38778	47.263912527721914	46.417965766009004	46.46828397051593	1.3355497185921694	4.292456434241065	4.1526716666666665	4.305671	0.5764153820749023
CL0397	396	7	38679	50.36324620595155	49.98103697140128	49.171391190580024	1.398842901061382	17.55031103017141	17.394564714285714	18.091934	7.855051804667903
CL0398	397	2	38528	43.63320182724253	43.616179258252316	43.616179258252316	0.022720347053798662	3.856239238891196	3.4278089999999994	3.4278089999999994	0.5718340000000001
CL0399	398	6	38483	54.826806641893825	49.931989200560324	50.574546938996896	5.734626247766952	943.7622078752174	808.1777576666667	951.2115095	646.8539934296377
CL0400	399	2	38285	46.01279874624527	43.90825588037764	43.90825588037764	2.2712452042210565	7.347734720125374	6.4590635	6.4590635	0.9590635
CL0401	400	2	38267	46.75569028144354	46.24303929169738	46.24303929169738	1.3845448108276024	5.0757397731465765	5.0273235000000005	5.0273235000000005	0.1307604999999996
CL0402	401	12	38094	50.75077440016801	51.45956590818373	51.59377335318415	5.974005870135801	5.475737895285348	5.26060025	4.311676	2.3578538139282204
CL0403	402	6	38044	55.887919251393114	55.50598262941558	55.57918079203159	1.656848088361197	3.5927633055935226	3.6368395000000007	3.348119	0.7157533534441759
CL0404	403	7	38023	47.35291797070193	46.41475960441143	48.696285506190826	4.814703269902132	11.459995976803512	13.616941	4.8603760000000005	22.302840079772924
CL0405	404	3	37933	54.525083700208256	46.66008555515118	49.67535923363491	9.931585493881672	210.0789226045132	261.21192766666667	39.092831	333.52481221110116
CL0406	405	6	37926	45.6125085693192	44.584661091582134	44.93517180370709	1.6496705417480009	4.528051651742868	4.4642	4.5218215	0.6273467991342587
CL0407	406	6	37914	51.09458247613019	50.96776744794119	51.90248505091085	2.5844337001453455	3.7797474051537687	3.7796425	3.8899529999999998	0.3144435748719474
CL0408	407	6	37758	55.3948832035595	54.96626922993771	54.81311505738657	1.2399554450278614	3.6264729580486255	3.5392574999999997	3.449584	0.3700296317737046
CL0409	408	4	37651	53.52845873947571	53.575882598961414	53.71884005174334	1.4226233331977722	5.308630371597035	5.6567409999999985	4.542028500000001	2.304680331756771
CL0410	409	2	37590	62.141527001862194	59.489708381954095	59.489708381954095	3.1228653484444	5.30588266480447	4.927366999999999	4.927366999999999	0.44575200000000015
CL0411	410	5	37584	63.2183908045977	63.87497851126668	63.99934004289722	1.8693745248924416	6.580107164272031	6.402462	6.360555000000001	0.5791441907639238
CL0412	411	3	37557	29.954469206805648	29.972676167322888	29.89908854166667	0.11188494231831757	5.701541052160716	5.670900333333332	5.130605999999999	1.2070238677414609
CL0413	412	3	37534	46.278041242606704	45.97247073180042	46.66975308641975	4.504241687276375	64.65835435370597	77.59382166666667	64.48277900000001	21.735867730038823
CL0414	413	5	37527	46.8675886694913	46.02792569549192	46.612068965517246	1.2584007472562595	5.248199134063475	4.492360799999998	4.700061	0.9070477276279127
CL0415	414	6	37455	46.89360566012547	46.606276333713176	46.91251663278194	1.0985117339352308	5.266248440448539	5.162106	5.225230000000001	0.3901661765974424
CL0416	415	3	37372	46.92818152627635	43.66659464821644	45.01204819277108	3.67854332808626	19.960883240046027	45.79854333333333	50.753401000000004	22.791565512863546
CL0417	416	4	37335	44.18106334538637	38.72324826451053	38.44137911246445	5.837986203409319	27.701813920155352	74.84512775	63.480540500000004	70.82814206861335
CL0418	417	3	37296	51.94122694122694	52.17147914226532	52.22676538844071	1.2927582842355403	4.08146692264586	4.095023666666667	3.892132	0.3050840754331317
CL0419	418	4	37169	51.69899647555759	52.00758369478393	51.850075429620894	1.7697630067561183	4.434110183244101	4.3829660000000015	4.346348	0.4695630047443048
CL0420	419	8	37126	55.19043258094058	56.07175540894036	55.864558502920026	2.4491683390238093	3.400431317971233	3.486511	3.3722135000000004	0.34564742729369485
CL0421	420	2	37082	38.501159592255	42.89280661794781	42.89280661794781	5.136933159003867	40.70716604498139	67.0830005	67.0830005	30.8519555
CL0422	421	2	37018	58.163596088389426	56.20534663839045	56.20534663839045	2.2350150502578185	135.53256956102436	144.6202775	144.6202775	10.372102499999997
CL0423	422	8	36676	47.20525684371251	46.56916272402008	47.171914354566546	2.2619114051681954	3.857310083024321	3.90716775	4.0170805	0.3236271104796961
CL0424	423	3	36614	51.52946960179167	51.644134842232845	51.997845021100844	0.6081955031200743	3.918674946359317	3.903631333333333	3.9875410000000002	0.12024790346705518
CL0425	424	5	36544	54.766856392294216	53.06661059802347	56.0082669028639	4.678395218107894	3.763629250410464	3.4559813999999998	3.656856	0.6776340436665207
CL0426	425	5	36500	50.767123287671225	48.65423684292944	48.817442719881754	2.6905773833013416	28.730730036438352	86.53658440000001	13.487031	93.78744740374313
CL0427	426	7	36392	40.90459441635525	41.819151374659775	43.19634703196347	6.473451879496419	35.93843261016158	38.18837214285714	33.883946	21.5885884791628
CL0428	427	3	36281	47.39946528485985	45.17381750253664	48.51908396946565	5.675611389814991	409.2238261719908	288.21661966666665	372.06553399999996	201.5538392458465
CL0429	428	8	36097	41.47159043687841	39.60965945050317	40.59899744995742	5.180041873145645	54.95982476117129	42.87663775	54.852123999999996	24.517118168289894
CL0430	429	4	35922	54.39285117755136	53.46140250238153	53.61624415427165	3.699007252223679	63.33720909044597	55.373862	54.4847145	14.794571988465314
CL0431	430	2	35901	41.817776663602686	42.03556872017318	42.03556872017318	0.25415090599504003	19.805527993732763	39.075853	39.075853	22.487370000000002
CL0432	431	2	35876	45.71858624149849	46.503596639205206	46.503596639205206	1.3777043845086678	7.900023071189652	8.092103	8.092103	0.3371030000000004
CL0433	432	6	35832	45.208193793257415	52.013650026605575	58.38640577120737	11.315949901540401	177.03862616834118	77.7925136666667	14.969372	144.34136183519496
CL0434	433	2	35775	45.5904961565339	46.782777398616886	46.782777398616886	1.419665882360427	4.6175314633123685	4.6408830000000005	4.6408830000000005	0.0278050000000003
CL0435	434	6	35645	41.57946416047132	39.96541118157207	39.234962131037314	4.009765827072301	52.49454520196382	82.13678683333333	42.2154665	63.05176031667576
CL0436	435	7	35590	50.949704973307114	51.33432629058037	51.051649035469815	1.2478089253454854	23.84950969536387	41.637117714285715	4.273263	91.7979445697183
CL0437	436	6	35571	57.22639228585084	57.12771718845773	59.88793803435018	6.049958034919375	21.15953728860589	23.032501	4.3670155	42.539279961660206
CL0438	437	7	35562	46.27411281705191	45.502367863984645	45.60559685177089	2.3586606398359367	4.216956101400371	3.986867142857143	4.162380000000001	0.6572843148636948
CL0439	438	6	35516	52.7001914630026	52.741404405725575	53.1579282727451	1.5076648740181062	3.47779858272328	3.3619920000000003	3.4959275	0.3936643811971478
CL0440	439	6	35512	56.80333408425321	57.22368889494036	58.15354114406749	2.595611189459893	36.06825055488286	46.08391316666666	32.3873545	33.593122647497076
CL0441	440	3	35483	62.22698193501113	61.69041416857851	61.09034669416162	1.2583645305138738	5.906706829636728	5.932684666666668	5.873403	0.2770542952952645
CL0442	441	5	35428	40.456700914530884	41.752826945320656	42.16634429400387	1.820154859898136	91.5037330726544	84.8073684	67.47636800000001	62.59049872944007
CL0443	442	2	35338	40.37862923764786	40.47304073693472	40.47304073693472	0.28003303355708553	29.353163784368103	29.7548675	29.7548675	1.1914894999999994
CL0444	443	2	35255	47.230180116295564	48.16155111647365	48.16155111647365	1.6719529818869994	294.5877582536378	393.437765	393.437765	177.45083699999995
CL0445	444	2	34940	44.22152261018889	42.560231053587984	42.560231053587984	2.234410924152588	45.7313102465369	28.704848	28.704848	22.900323
CL0446	445	11	34898	56.4817468049745	55.99429883623114	56.46959814853776	2.0738599942372518	3.5522154098802226	3.338611818181818	2.974548	0.7091512138777812
CL0447	446	14	34647	60.35154558836263	60.935164648490726	60.569714000547926	3.706839333199445	4.556281768580252	5.101280285714286	3.5430585	5.670867534323832
CL0448	447	5	34608	57.48670827554322	56.227921473090106	58.56464835322882	4.003814643573857	4.346717679524965	4.217067	4.331994	0.6019302642007628
CL0449	448	4	34592	47.698889916743745	45.85346518069351	46.32669192669596	2.3336870132291048	7.486223405440565	24.153420999999998	4.838744500000002	34.18869227429778
CL0450	449	3	34551	39.350525310410696	38.21325840269744	39.93986469556502	2.9854325847873118	17.31024262354201	32.481912	30.233541	22.044646045342272
CL0451	450	5	34415	39.834374545982854	41.328951097690506	40.64070351758794	2.831532866856905	71.63288560720615	103.5401566	69.017611	85.12099995029774
CL0452	451	7	34398	38.98191755334612	38.95817340222509	36.45058448459086	5.15863529375944	119.64302214410722	102.62688042857144	25.021835999999997	109.80719492409264
CL0453	452	4	34359	47.11429319828866	47.39845046493022	47.345144415495845	1.8241873698135904	5.191334209639397	4.4838245	4.7860394999999984	1.2851946067192508
CL0454	453	3	34310	47.05916642378315	47.4619285938206	47.46975474273879	1.0813726389881368	5.3214422047508005	4.610344333333333	5.124776	1.0512008936558648
CL0455	454	10	34266	55.346407517655976	54.863161390150296	55.34960997616505	3.3158512431566662	3.721376349734431	3.6830899	3.5334055	0.6048592672563511
CL0456	455	4	34263	60.80319878586229	60.56736318440032	62.990796530490634	6.897575563356392	5.500201747453522	5.153351000000002	5.0709415	0.8030064510945722
CL0457	456	2	34235	44.25587848692858	43.91058338424446	43.91058338424446	1.3837267751832805	40.40489384810866	37.668475	37.668475	10.965855
CL0458	457	5	34205	45.35009501534864	45.39220355356129	45.61943589316915	5.5902076228276965	74.84862286768019	70.22012640000001	70.422031	5.649674987128186
CL0459	458	7	34163	47.876357462752104	47.36880985963383	47.1854930109558	1.4586869550600536	4.158527967977052	4.032287142857142	4.164701	0.5085148058531203
CL0460	459	3	34144	44.31525304592315	44.46097066835984	44.31946006749156	0.27474754457689377	4.310442461457357	4.266357	4.390429	0.1957005022800572
CL0461	460	3	34073	39.65603263581134	36.7722625190247	35.20981544489123	4.018375274858559	47.65352411762979	26.942744	9.577713000000001	29.771446585590766
CL0462	461	6	34057	41.912088557418436	41.89050313622128	41.95905160002288	0.6948786514709089	57.80816072319935	54.95500300000001	63.0802295	22.88721584632984
CL0463	462	2	33893	36.14610686572448	37.25013202849132	37.25013202849132	1.360631425826572	34.702693407812816	30.94584	30.94584	4.630051
CL0464	463	3	33738	62.0250163020926	59.66664111842567	62.24335044330378	3.7841366207922427	29.474248252682443	20.766079666666666	10.160733	19.92690557263344
CL0465	464	4	33657	50.29860058828773	50.26657352748559	50.946096492091705	2.0840369816972686	4.704339539174613	4.55716475	4.4132545	0.6158911677278605
CL0466	465	5	33656	51.161754219158546	52.99566388069525	52.01342281879193	2.5448277904380245	6.2469715899393865	5.9576666000000005	6.146007	0.5631229789403378
CL0467	466	3	33629	47.12004519908413	47.225876939659685	47.101274957902326	0.26296155969523866	5.263169781527847	4.754845	4.451739	0.4503452552194445
CL0468	467	6	33575	47.380491437081155	46.42126002732376	49.81178839093878	7.410348305061048	16.388517631988087	17.107855666666666	17.999141	6.5464113237788455
CL0469	468	6	33459	38.20496727337936	39.353690409340956	38.382549959598414	2.9529707941109637	58.67048847622464	63.22643716666667	61.24482450000001	13.065357165188205
CL0470	469	8	33458	57.14926176101381	56.0480912653739	55.881697966744774	4.084933821215997	3.2578652504632672	3.099711875	3.069654	0.5505931996155232
CL0471	470	2	33428	37.41773363647242	37.159174801221155	37.159174801221155	0.5320798291541102	31.472111634079212	33.2929045	33.2929045	3.7469505000000014
CL0472	471	3	33410	38.42562107153547	38.48091433853683	39.359473211613285	2.3581716966388457	43.28108596737504	36.290066333333336	28.386694	28.28319141821074
CL0473	472	4	33393	37.903153355493664	37.98491494850564	37.28767597887219	4.952824609062419	66.46050355565541	59.326210499999995	70.3984105	32.58949004092318
CL0474	473	6	33335	41.16994150292486	41.33162102133723	40.965350676888825	1.172085051553072	67.61637976886155	108.3006075	73.73760899999998	108.49220375748872
CL0475	474	6	33322	50.86129283956545	51.02933119176325	50.76153114782643	1.4998740762268818	4.959822809375186	4.9486514999999995	4.87711	0.9632801281610228
CL0476	475	3	33274	39.30095570114804	41.6226960135966	39.10650887573964	3.7167957066495902	64.49923114428681	73.26460666666667	75.216877	18.257074018574688
CL0477	476	6	33264	39.45707070707071	39.358929969149386	39.36014085144603	0.9504558401033228	74.26290986450817	45.49844433333334	36.397003000000005	45.17966255707759
CL0478	477	3	33244	45.57814944050054	46.8595132167165	45.7465584186375	1.8009802004637259	8.311707970611238	8.330243333333334	8.27356	0.4216457558253793
CL0479	478	5	33216	54.03118978805395	55.136643695150354	56.09348914858097	2.058720200895634	4.382405289890413	4.3179514	4.200679	0.3521313582585908
CL0480	479	4	33198	43.31586240134948	42.58444807632553	43.39761156274918	2.093115261277546	3.6111141101271165	3.4498855	3.7115765	0.54748014227664
CL0481	480	4	33138	41.242682117206826	41.33004871277731	42.25303462360651	2.09915675600876	31.40656309795401	30.10117525	31.48127	12.297598487048564
CL0482	481	10	33110	56.78646934460888	55.63919544757646	56.11917576507245	4.099902873171982	5.843532838810028	5.7333942	3.9434584999999998	3.391298410258372
CL0483	482	3	33073	50.76346264324372	49.67511442244515	50.900261144454106	1.7813421448461055	14.69532639769601	15.991963666666665	15.737951999999998	3.180675195175004
CL0484	483	8	33025	38.66767600302801	39.15691368559223	39.54253129906512	3.1650096061550257	47.58695814059046	73.693241125	37.091183	99.71594719415293
CL0485	484	2	32949	60.35691523263225	59.201585874015635	59.201585874015635	1.3393950612947843	5.439214525569818	4.6694845	4.6694845	0.8923625000000002
CL0486	485	8	32854	55.33877153466853	54.4389444682413	52.03293475932379	5.196506446060803	5.515121788701529	4.9627317500000006	4.435425	1.7260006026185035
CL0487	486	6	32843	50.75054045001979	51.30104280419401	51.050423029076484	1.2582985129976378	4.404470161008434	4.292379833333333	4.4040045	0.5789277336644061
CL0488	487	6	32825	39.74409748667174	39.66617165304023	40.29585260516916	2.8037786156914337	70.2432950178827	61.63430816666666	66.15282049999999	31.225697291079854
CL0489	488	4	32822	42.46237279873256	43.23200339285351	43.310996821519744	1.1373081170982122	5.616154625495096	4.89519	4.3677525	1.117043330766761
CL0490	489	6	32804	52.78014876234606	53.12267598146008	52.7147107760743	4.144918406442272	4.368768036215096	4.377236166666667	4.0524505	1.1891655495342686
CL0491	490	2	32729	45.36343915182254	45.017399515620276	45.017399515620276	0.5694942049210071	4.400507506156621	4.1737745	4.1737745	0.3731455000000001
CL0492	491	9	32699	58.12410165448485	57.722656836316325	57.18440954043048	1.90900947967612	3.751080053090308	3.749670333333333	3.841246	0.4440398496791826
CL0493	492	6	32673	43.86190432467175	43.97536400208474	41.49466579084464	7.39453136606505	49.873748874789584	91.01638283333334	109.130371	63.64784178251491
CL0494	493	3	32595	38.085595950299115	38.007041492282255	38.245415012289655	0.7369616879769606	51.04443393124712	37.274938	52.820763	23.154905632562198
CL0495	494	4	32496	41.762063023141316	41.746270464757174	41.952509925101204	1.4428181474714123	70.14481334776589	53.35597425	61.972053	30.048146731924227
CL0496	495	3	32346	51.0325851728189	50.558728095691116	50.95494311414137	1.349137276803157	31.789159655475174	32.07188266666666	31.224368	1.588668101625872
CL0497	496	7	32345	52.088421703509034	52.2777790630361	52.34619395203337	2.4515979354938655	4.063260543793477	3.834096428571428	3.6126150000000004	0.7916398709129691
CL0498	497	7	32279	42.5756683912141	42.21609614402576	41.81096681096681	2.6092749149504604	6.625611501843302	8.817602571428571	4.07926	12.036553420975173
CL0499	498	4	32170	43.068075847062474	43.01335353542881	42.94918289904947	0.7699581413741099	53.24476364706247	51.97971500000001	55.2351115	8.100519429574778
CL0500	499	2	32169	41.38456277782959	41.962388453535326	41.962388453535326	3.1954743272782795	6.423093118063973	6.5530525	6.5530525	0.7186974999999998
CL0501	500	6	32133	57.417608066473726	56.773973273962575	56.415273972137605	1.0523988542204752	3.7016254981483216	3.5391631666666665	3.510021	0.5608393863850912
CL0502	501	5	32085	38.80941249805205	41.378264214039824	41.374122367101315	2.2507772403266344	24.380129600966182	21.0047464	19.177331	7.662930452343637
CL0503	502	5	32048	49.49450823764354	47.68785440131484	50.26124488868696	6.161194994740082	5.161596887762107	5.7962678	5.698276	1.69592643250884
CL0504	503	4	31939	50.47747268230064	49.37807669015736	49.900726371403245	1.7728171076157369	6.147252822129683	6.156149750000001	6.0991135000000005	0.578144602160383
CL0505	504	4	31910	38.81541836414917	39.47070103291019	41.23359116918239	3.6041252519549034	220.49787941805076	109.44397875	26.342885	145.39511599640198
CL0506	505	9	31795	40.84289982701683	42.69971360662868	43.95472061657033	3.64374888035302	137.97816359924514	199.88654344444438	177.4857	172.98476484245376
CL0507	506	6	31637	49.81825078231185	50.394339335693395	50.268187621276205	1.6125469697459418	4.5018069318835545	4.474494166666667	4.545177	0.4881272318646086
CL0508	507	5	31581	47.43991640543364	46.86825010960676	47.409673102657244	1.792683569324382	5.054765116620753	4.5165120000000005	4.6231089999999995	0.8299468634718732
CL0509	508	4	31397	49.762716183074815	50.515194295050065	50.53590947966357	1.3962144406677897	3.8631570868872833	4.104671250000001	4.1802315000000005	0.35953597871171045
CL0510	509	2	31375	38.44780876494024	39.16387216658981	39.16387216658981	1.44693045834709	25.65246494865339	41.6401185	41.6401185	32.3058305
CL0511	510	4	31354	60.945971805830204	60.6966466709109	61.05551039761565	1.0136311820678487	3.8090727626459135	3.4576525	3.240225	0.5549340634762386
CL0512	511	15	31345	50.57265911628649	50.158577401946346	49.74039460020769	4.121647227111039	192.4093608915936	241.76876533333333	172.84333	228.8651931535822
CL0513	512	5	31281	39.15475847958825	39.50670208945253	40.169581346051935	1.6149657732682203	69.98087865688437	70.1733164	72.30754300000001	12.904230841800723
CL0514	513	3	31038	41.011018751208205	41.9399737947541	41.237274862960064	1.7746344884513616	24.237698090824146	23.92713633333333	22.504323	2.2028368292445584
CL0515	514	3	31035	46.37344933140003	45.93762557987381	45.38053533982978	1.8538370453293969	5.0677756316416955	5.1662696666666665	5.190864	0.4911322618971614
CL0516	515	7	30900	48.61488673139159	48.43015712209331	48.253968253968246	1.8319707493993624	4.019196864271845	3.930151428571429	3.750421	0.6623066756685319
CL0517	516	3	30751	31.06240447465123	33.035818498780024	31.06057710682209	4.624735777277971	5.984796879516113	12.248603999999998	10.727977000000001	6.841569404842576
CL0518	517	6	30721	42.86969825201002	44.82827720115818	44.74770146437724	5.409990553178639	111.16953939767586	56.78528299999999	25.144780500000003	61.247626251003936
CL0519	518	4	30663	49.45373903401494	48.69173877296704	48.39556229707946	1.140721228880667	14.566307629455698	15.211808	14.7862225	1.7184453900783407
CL0520	519	3	30662	35.561933337681815	36.25457318431979	35.59106057635758	2.5504960860897574	4.729271997293067	4.884885333333333	4.669223000000001	0.3667546956066895
CL0521	520	4	30635	50.5794026440346	50.767716953628856	50.81527313997721	0.6708065248269734	4.1583973835482295	4.0963519999999995	4.1425825	0.21796222818071045
CL0522	521	4	30506	39.044778076443976	38.861824378403284	38.77363661703007	1.3223708352098895	61.184420134104776	124.34393475	65.2993245	121.43304104958368
CL0523	522	4	30446	56.23727254811798	56.236023668629436	56.28040457519498	1.2585726681740463	227.12592363170856	133.30689775	130.480847	105.58040456550249
CL0524	523	5	30410	54.49523183163433	53.83882463838275	54.474256707759245	2.913398195997931	22.614485747352845	22.359084600000003	19.109507	4.625950488003372
CL0525	524	3	30246	39.98875884414469	41.064296676064735	41.478129713423826	0.8764091577254547	374.90498322396337	157.87505666666667	36.602577000000004	174.17733400288242
CL0526	525	3	30236	41.400978965471616	41.313490752460034	40.773115773115784	1.6130587724669463	60.838729746957256	65.41986933333332	20.624719	75.764659268251
CL0527	526	4	30067	44.69019190474607	48.35445735637713	49.444356387640546	5.169900338930828	81.91670130505206	77.20681450000002	76.25360699999999	6.3023310340934415
CL0528	527	4	30052	55.61360308798084	55.72141433721961	55.566987006362474	1.1081687938628615	150.62300603517238	146.338427	145.4777565	111.32905931313714
CL0529	528	6	30033	54.659874138447705	57.670414678717115	58.62056695054175	3.61233935005514	6.011582928179003	4.327520833333334	3.8170095	1.7348765091400036
CL0530	529	3	30031	39.41926675768372	39.32054145879269	38.91730016125317	1.6447427732129112	53.567909837368056	43.119706	50.940861	29.023839065628554
CL0531	530	6	30008	47.57064782724608	47.00585234007118	47.52855405769822	1.9685760881224703	4.0907216767528665	3.708690833333333	3.705998	0.5429582949602473
CL0532	531	5	29994	38.401013536040544	36.258188145039455	37.508233744236385	4.0709810840620335	29.556353639627925	28.6664644	12.034047	23.040618022585225
CL0533	532	6	29982	52.95510639717163	50.6181508541223	49.200225373988296	3.2410618929073776	502.4275126373825	474.17125233333326	507.856332	84.2648213468838
CL0534	533	4	29963	42.832827153489305	43.82686629294861	44.07694644031179	2.9762973768818712	3.7086218749791406	3.58782575	3.5985705	0.4103659119434599
CL0535	534	2	29914	46.54342448351942	46.60184305471451	46.60184305471451	0.139290063664113	4.56505970582336	4.435927	4.435927	0.3078970000000001
CL0536	535	6	29856	58.89938370846731	58.581446962087384	59.2013611378721	2.139631006906713	7.507718411039658	10.006653833333333	3.9091125	13.804788815566955
CL0537	536	4	29847	40.51998525814989	41.12739504999933	40.693299017884065	2.2312398059174643	62.165417248031616	39.95992275	37.948799	34.02325025101323
CL0538	537	8	29832	54.70635559131134	54.52737887176063	55.123377182302676	2.4833817337246984	3.188964168074551	3.119231375	3.186773	0.3274700991926352
CL0539	538	5	29780	50.44325050369376	50.3855382218112	50.33967391304348	1.5333682498681758	14.116065873002016	15.057191799999998	15.672573000000002	6.8185058644715815
CL0540	539	7	29769	53.13581242231852	53.141847594097726	53.202176642946846	2.196779889378484	3.24047255910511	3.0998324285714287	3.141995	0.3763435670348713
CL0541	540	7	29645	43.66672288750211	45.14660177483464	47.024893746205215	4.689447979783683	223.86221182975208	274.13645342857143	127.076131	406.7299817654301
CL0542	541	3	29628	44.87309302011611	45.6567828358521	43.434507385164736	4.394672107638456	51.37516335965978	50.029209	50.547982	14.347312047950613
CL0543	542	3	29618	47.50151934634344	47.47949390919469	47.51879699248121	0.16987627126036758	4.148257334188669	3.7054419999999997	4.169122	0.7445852287620717
CL0544	543	4	29613	54.9319555600581	54.258507294138326	54.38528568864199	0.9123315566710584	3.774697737277547	3.71774	3.7363199999999996	0.22419630616939248
CL0545	544	5	29604	54.78989325766789	54.20263377302118	53.75260597637248	1.9887600984150289	3.7613481934873674	3.5440886	3.6507940000000003	0.7070678513524992
CL0546	545	3	29504	47.18004338394793	45.6343614955201	45.97285067873303	1.6021561462178315	4.7339511192380686	5.833310999999999	4.601413	2.3814377897805072
CL0547	546	4	29471	50.313867870109604	50.535541128278865	50.222158279295996	3.305762698349592	7.0698318215873215	11.1352675	4.933043	11.84924507213429
CL0548	547	2	29459	45.127125835907535	50.31311355401516	50.31311355401516	5.710537591587207	29.582877190162602	16.893335999999998	16.893335999999998	13.973057
CL0549	548	9	29456	57.5468495382944	57.692572905608856	57.57358219669778	2.1373899568868797	4.432174223010592	4.670533333333333	4.2238809999999996	1.4124958361849345
CL0550	549	2	29440	52.89402173913044	53.6957993231423	53.6957993231423	0.8922783727719619	11.976874792017664	13.9113815	13.9113815	2.1528645000000006
CL0551	550	6	29354	52.65040539619813	53.09810605532121	53.11403454994461	1.2925848557998358	4.713863068644818	4.559375333333334	4.4734085	0.6911274433804199
CL0552	551	4	29319	55.7317780279	54.055386227911136	54.27203112846929	2.8266997781095533	3.7913268342712922	3.8930615	3.7691004999999995	0.26664609945440804
CL0553	552	5	29296	53.47146368104861	54.164791842342794	54.877306834313536	3.193386183412739	4.3804887616739485	4.2091788	4.3352	0.3569704894611879
CL0554	553	11	29209	57.222089082132214	57.07200893237083	57.23788406715236	2.4149821568789225	4.619428708856859	4.716679363636363	4.48358	1.8127101581750344
CL0555	554	2	29149	47.99135476345672	48.29819532133818	48.29819532133818	0.3412604609747341	6.279985267968026	4.535226000000001	4.535226000000001	1.940478
CL0556	555	5	29140	40.147563486616335	40.320616289664024	40.884663083918966	3.9893389409149336	82.58119806606041	128.75445860000002	46.472737	167.93604756106902
CL0557	556	2	29130	54.37693099897014	51.920658616476096	51.920658616476096	5.340439953877564	19.69868442245108	14.8661185	14.8661185	10.5069895
CL0558	557	4	29113	61.594476694260294	59.00913077852907	58.03146393762988	2.9542271836981704	10.683745037646412	13.40106125	13.986733	3.3495571701989486
CL0559	558	7	28970	54.74628926475665	54.63588018392546	59.085133418043206	7.2146529735568885	3.6150973143596823	3.5676137142857143	3.636571	0.7021142911585415
CL0560	559	3	28926	41.85162137869045	42.99756874983829	41.080011309018936	8.264256471223764	117.24993684131924	170.45176533333333	94.856952	148.21433806034418
CL0561	560	4	28909	57.32124943789131	59.74485637520989	60.687872410689785	5.112307020603058	8.405692389498078	8.779376000000001	5.831419	6.110949290749475
CL0562	561	2	28900	43.55363321799308	43.60111959819936	43.60111959819936	0.06689852724781176	11.30867712467128	10.883338499999999	10.883338499999999	0.5992144999999995
CL0563	562	3	28897	55.538637228778065	52.98942181763647	54.39759036144578	4.092873437507495	5.0144377134304605	4.503884333333333	4.770789	0.8108241854415105
CL0564	563	3	28887	51.63568387163775	51.44534029476396	51.08532934131737	1.1719704267159192	4.444581517083809	4.172808666666668	4.4158550000000005	0.5313746502110247
CL0565	564	4	28826	47.335738569347114	47.26409148571707	47.339678983863585	1.066811590477984	5.023281535939778	4.88569375	4.843935	0.3691728566399317
CL0566	565	4	28821	50.03643176850213	46.56010893051462	46.118560097149604	6.327643820760218	4.2443000609971895	3.69662075	3.6109699999999996	0.9203292504447456
CL0567	566	4	28790	55.3108718304967	55.987769671820345	56.16941184311919	1.1504644917149764	9.748641785620007	11.10000275	10.7273005	2.036636408526492
CL0568	567	3	28754	44.27557904987133	45.20260643768504	44.935844935844926	1.2738918954656222	38.14031095955346	47.64204966666667	47.139656	12.41993861695208
CL0569	568	4	28715	47.17046839630854	48.41847121253053	48.3405112509695	4.024650275390436	43.622073520912416	39.49113425	39.249402	12.10722018777412
CL0570	569	6	28644	50.30372852953498	47.867550898356896	51.36351846305334	5.664923980010866	14.408182111471865	22.415218	4.7357879999999986	40.00917957428931
CL0571	570	3	28619	43.97078863691953	44.6567998479072	44.8066163950377	1.0188783050684604	67.72168754512735	68.32774666666667	67.609199	7.252496539504003
CL0572	571	6	28508	51.59604321593939	51.816545951152285	52.017285513248474	2.3033321094449186	4.684204074610637	4.722102	4.42623	0.5816013510865212
CL0573	572	2	28466	43.87690578233682	47.16782095602375	47.16782095602375	3.820521669419741	13.510367027928051	9.0664745	9.0664745	5.1590475
CL0574	573	5	28455	50.897908979089785	50.91762471565612	50.233928261999644	1.2950359286603392	6.057966261184328	5.8932088	6.1188400000000005	1.1431675391343827
CL0575	574	2	28425	27.89094107299912	34.11366886076567	34.11366886076567	6.7991942097737486	16.87295166191733	9.6938335	9.6938335	7.844183500000001
CL0576	575	6	28338	53.348860187733784	53.442453342727205	53.39026361453802	1.1027572205953695	3.9402656030065626	4.0197955	3.914595	0.6570295398718766
CL0577	576	6	28253	43.08569001521962	43.22065143495686	45.13363005929391	4.5596414532913885	7.575589245991577	6.926552666666666	4.552313	5.495568119497827
CL0578	577	2	28246	55.820293138851525	56.0930975251715	56.0930975251715	0.7048694379797062	8.752793484776605	9.5525655	9.5525655	2.0664435
CL0579	578	4	28201	51.976880252473315	51.779799817488225	53.3008461112889	3.6559045463867523	658.6899265220737	531.8795522500002	535.9913215	219.7935136305146
CL0580	579	4	28121	54.82379716226308	55.00358335612307	55.169379335104075	0.5381783778720343	21.54530276177945	20.06337225	19.94173	3.8211829197718585
CL0581	580	3	28020	49.068522483940036	48.26624052535957	46.968779728444176	2.673234111273158	3.4535295849036403	3.48582	3.524349	0.1191031958513288
CL0582	581	5	27889	42.00580874179784	45.84834004107954	46.82539682539682	5.342972919117453	168.6981573160386	234.1931306	127.603284	180.3215997913486
CL0583	582	8	27857	49.93717916502136	48.756017287205545	49.645879117699096	3.4967541459311495	6.008752035789927	7.044679375	5.265205	6.590186216660531
CL0584	583	4	27821	56.94619172567485	57.262224452865475	57.596096813005644	1.8133855707975877	4.158435427626613	3.92552975	4.025628	0.7463367355066262
CL0585	584	2	27814	54.49773495362047	57.1653314756763	57.1653314756763	3.4616277719726014	5.010107606672898	4.058477	4.058477	1.234891
CL0586	585	8	27787	57.490913016878395	57.68667603036232	57.693760280284785	2.7524930327668287	3.9782133664303454	3.886501375	3.1638655	2.1762902928396257
CL0587	586	7	27759	40.44093807413812	39.70721854682	36.971484759095375	6.4994901712411055	4.972950540869627	5.077601285714286	5.123354	0.8288689288233547
CL0588	587	5	27727	41.053846431276384	40.168121575036686	39.892419314485856	1.6133309925177732	195.31761981371943	181.69064740000002	161.738324	76.82193022752894
CL0589	588	3	27683	50.2329949788679	50.294088616860286	50.892538379150295	1.5093094542835641	5.2584807899794095	5.330783666666666	5.151611	0.4342268406331214
CL0590	589	6	27665	57.440809687330564	57.663527827858594	56.891898465465076	1.8102825444749815	35.193399493800825	33.64863083333333	33.667703	4.544795497612752
CL0591	590	4	27600	42.79710144927536	41.55135138832744	41.966558456086226	2.711203513252576	66.10584900228261	86.40750249999998	69.0953585	42.69640535860571
CL0592	591	5	27584	49.253190255220424	49.67856805186195	49.369306236860545	1.7228314882081388	3.9795076413500574	4.123727799999998	4.051709	0.42780341960830576
CL0593	592	7	27553	62.08761296410554	62.271295313633445	61.71477079796264	2.0889678511167418	4.374759753021449	4.378803571428572	4.746316	0.8632652334964459
CL0594	593	7	27509	55.0219928023556	54.73105672413228	54.317377251038934	3.110135236758905	3.866970337271438	3.743521714285714	3.688525	0.569793445956318
CL0595	594	4	27462	39.17777292258394	39.1383859600098	39.03931427704345	0.5815946854030322	28.372907769463264	36.1712625	31.734848	20.271466626499183
CL0596	595	6	27449	58.198841487850196	57.233229990405476	57.03865292546459	2.0093571780325776	3.5033649628401755	3.2837730000000005	3.2686575	0.6659276340454219
CL0597	596	5	27434	56.68149012174674	57.07316644892667	57.364888731896855	3.0924903421812284	3.8073256339578623	3.738268	3.738482	0.20198587111379832
CL0598	597	6	27430	48.58184469558877	47.02614450963935	47.18325999841665	2.6381942348113694	170.84272923448782	113.83624516666664	98.575952	86.0969928592543
CL0599	598	5	27423	41.2354592860008	40.93176024008996	41.73182978022883	1.6243359968258282	80.13840100299021	69.5913626	88.259514	33.74939605426194
CL0600	599	3	27396	39.76857935465031	41.46038134134633	41.69954904171364	2.119230033163141	64.24446390217551	58.99632733333333	64.450622	9.766667102541424
CL0601	600	6	27384	62.5	58.967716470032606	63.411187898903215	9.164490179280444	3.6860592057040606	3.338908833333333	3.5769505	0.7459569626301991
CL0602	601	8	27370	38.98794300328827	38.62185288580211	38.66286853863341	1.7988495756092453	106.58696320343442	145.54750274999995	107.795927	109.77002131995278
CL0603	602	5	27342	46.64618535586278	46.58183241868701	45.95580982442296	1.3127872270430294	4.266273568648964	4.0801546	3.872461	0.7992449615757614
CL0604	603	2	27315	40.56379278784551	44.47469162686424	44.47469162686424	4.6553450031723855	18.02194452861065	39.8804095	39.8804095	26.0192605
CL0605	604	8	27280	55.106304985337246	55.454483018399074	56.06371489273596	4.307692546156149	3.292883143914956	3.15954325	3.06915	0.5803525461040363
CL0606	605	3	27250	56.68990825688074	56.46540883012178	56.903548017896156	0.8174242882019416	4.317461404954129	4.283118000000001	4.325529	0.16054556240727005
CL0607	606	5	27190	40.81279882309673	40.060781586717866	42.16275259421081	4.415285807523617	41.649661338617136	69.56818	25.904463	86.5933003984038
CL0608	607	3	27167	42.44855891338757	43.106175125338886	42.5469781615033	1.2728018383497297	3.2456819426878196	3.188245	3.157584	0.3349340901759629
CL0609	608	3	27125	37.34930875576037	37.408496320065616	37.61996161228407	0.35481687299100906	37.9825679117788	50.312321999999995	43.162655	19.510476334000614
CL0610	609	11	27124	56.38180209408642	56.64480662511829	55.72916666666666	2.454436181203373	3.438098320048665	3.3725461818181817	3.501213	0.5307887308959647
CL0611	610	5	27050	50.40295748613679	51.02883720858711	51.99562602515036	2.00100942476001	756.2211533438444	427.5383658	75.81442	726.773472483105
CL0612	611	2	26967	36.87840694181778	37.22076116089171	37.22076116089171	0.9335894656453512	23.530667527719068	27.9632375	27.9632375	12.087482499999998
CL0613	612	9	26896	49.765764425936936	49.846722126988894	50.6514657980456	3.9469741216453613	382.79739691593534	408.87939344444453	225.721715	302.14621903838537
CL0614	613	3	26893	41.482913769382364	41.71915694683968	41.31455399061033	0.5973845691612931	71.14355642434835	63.57189233333333	62.26494	8.898923113187132
CL0615	614	4	26864	59.2279630732579	58.5857179181929	59.80279061519355	2.1817706576374603	4.159097878871352	4.14757975	4.0479035	0.3533924719581439
CL0616	615	2	26861	42.288075648710034	42.2404718300966	42.2404718300966	0.2912061425131576	3.8932075791295935	3.8643035000000006	3.8643035000000006	0.17681450000000007
CL0617	616	4	26857	55.516252746025245	55.82694178843307	55.658049434802805	1.4413215435148763	27.368604890345164	31.03533225	30.1483435	4.951248841701676
CL0618	617	5	26840	54.575260804769	54.70174477766209	55.350553505535046	2.8860571761307146	25.56217607265276	25.4583738	25.065938	1.344517688032761
CL0619	618	4	26833	42.41419148063951	42.187407982423046	42.60560978651833	2.3510515669423544	39.358565907278354	51.8827835	39.6172905	28.724405475222287
CL0620	619	3	26792	56.17721707972528	58.46991014199957	58.19054146675806	2.467005201629549	21.5858622214467	9.630759333333334	2.534335	10.454273603893618
CL0621	620	7	26768	53.56395696353855	53.67614963933095	53.1538612694046	1.9162748198984203	3.5413522210848773	3.5618645714285715	3.4827760000000003	0.566521153585348
CL0622	621	3	26738	41.573790111451856	41.01387719700423	40.38331592849684	2.6820256192839564	8.057623744969707	22.807377	4.3037980000000005	26.370442432159237
CL0623	622	11	26719	54.964631909876864	55.18376556327517	55.691367456073344	3.6931532343595213	4.4031310683783085	4.1762440909090905	3.775447	1.5283081425156175
CL0624	623	4	26671	43.91286415957407	43.93780871952046	43.65547085605709	1.2318099386838584	23.32776288965543	19.994924750000006	19.0397535	3.705639514209077
CL0625	624	11	26656	64.04936974789916	63.898771581048535	63.41634514205543	2.884429949304669	5.265735267256902	5.005122090909091	5.198937	0.9429496437707346
CL0626	625	5	26611	49.5096012926985	46.22598807315825	44.82758620689656	5.68028284114551	3.5709006702115667	3.3352087999999998	3.5461440000000004	0.4678187499228307
CL0627	626	2	26574	39.02310529088583	39.0132426462389	39.0132426462389	0.037786897180961176	35.56872879747121	35.33106	35.33106	0.910584
CL0628	627	6	26565	55.83286278938453	56.908381107945345	56.76783945795177	3.5088721423429865	4.353100052851496	4.309036666666667	4.5199725	0.6206033942617637
CL0629	628	12	26495	56.22570296282318	56.15283930042304	57.306303150573775	4.25559977864413	13.728856746216266	17.211831666666665	3.96939	44.98688539324078
CL0630	629	6	26429	59.64660032540014	59.68818407751081	59.56717920292174	2.4646493017505704	3.5779421459760115	3.5448993333333334	3.4371755	0.26364136988319753
CL0631	630	4	26355	58.417757541263526	58.41223713244876	58.604883463319275	1.6178907243238836	3.7304299602731934	3.59213925	3.5152589999999995	0.4852476285343265
CL0632	631	5	26351	54.377442981291026	53.96382350636253	53.77741673436232	2.693931881299084	3.5656607988311637	3.4974772000000005	3.612833	0.4273643231723489
CL0633	632	8	26312	52.95302523563392	52.01801589329831	52.84147993481813	2.872206231080169	4.3022411238218305	3.833132125	3.5120415	1.5035785240982955
CL0634	633	4	26297	49.884017188272416	49.8787822510045	49.936849834488896	1.0166056545389734	4.803399350990609	4.93440625	4.8205125	0.8921108950008332
CL0635	634	5	26293	50.492526527973226	49.81421216153449	50.7162401416385	3.5995242415000144	3.4385279437112533	3.4301862	3.1946529999999997	0.4670071516023711
CL0636	635	6	26279	50.59172723467408	50.96541658733057	51.62143876089146	1.9079004333096916	6.112469422162183	6.1272895	5.924071499999999	1.4267084681824749
CL0637	636	5	26262	46.451146142715714	47.018144680961434	46.72979519929531	1.7284007084234772	4.062576290990785	4.125840599999999	4.070615	0.42556683493082503
CL0638	637	2	26207	39.27958179112451	36.43125184840238	36.43125184840238	3.6062700038126927	173.77106361907127	112.2644835	112.2644835	77.8734695
CL0639	638	6	26198	62.24520955798153	61.88949520479653	61.926985993357675	2.0557642365137774	5.831950999999999	5.430200666666668	5.751556	1.195194445438993
CL0640	639	9	26188	59.49671605315412	59.530187938795045	58.95336418654325	2.5878423377601134	3.835419938826944	3.610151666666667	3.7859849999999997	0.7469481899284136
CL0641	640	7	26172	39.88995873452545	41.75594964077943	39.222941720629045	6.953694199529508	44.39462878595446	61.82019328571429	7.626662	77.9991951830711
CL0642	641	3	26090	43.77922575699502	43.486173865585755	44.4976508854355	5.609915196126896	36.856155980298965	36.071641666666665	39.003614	5.564898486756929
CL0643	642	3	26084	37.85462352399938	40.1901510667149	36.99389647300004	4.56556720964592	56.75420057111639	81.063242	47.754275	56.93990075872678
CL0644	643	6	26068	54.388522326223715	52.79135041431929	51.62788753795042	2.3681379582440814	3.592972285982815	3.253025	3.259302	0.5089381654045345
CL0645	644	7	26049	56.08276709278668	55.86473373087736	55.48191630373035	1.6385805324621008	3.7419581375100766	3.733637285714285	3.7274309999999997	0.34095266569997423
CL0646	645	6	26031	50.54358265145404	50.764384047858464	50.914619775883	1.1507640875908771	14.187489116591756	14.023291	14.037465999999998	1.9582285611616768
CL0647	646	5	26025	56.21133525456292	56.25106129376172	56.290758708446	1.3645116664773411	3.4747908370028817	3.2374827999999995	3.5068330000000003	0.6169674216593288
CL0648	647	5	26014	48.03567309910049	47.54626187249588	47.82388021824642	2.3957970865309357	5.330333043745677	5.214045199999998	5.456632	1.1011616610773192
CL0649	648	5	26009	56.97258641239571	54.996041901068274	57.28405672539751	5.790038136107057	65.64655702952824	93.06985699999998	122.855774	53.566508754908476
CL0650	649	4	25901	53.82031581792209	52.83711325974706	52.92011042829426	1.4205859292723417	4.461339439867189	3.8940550000000003	4.023759	0.9003182317875164
CL0651	650	8	25869	49.05871892999343	48.76380619199608	50.98138641768336	4.122418999396586	4.801711175113071	3.9640800000000005	3.9250385000000003	1.0940389511274269
CL0652	651	6	25810	55.62572646261139	56.68400864979382	56.82343627630203	2.2460548206840403	32.502977488221624	38.35205466666667	35.83258	12.374505935408529
CL0653	652	6	25785	57.6847004072135	57.12520212356564	58.45494415600765	5.100430971130867	6.504067038239286	7.675869500000001	5.6074910000000004	4.58558395903607
CL0654	653	5	25774	48.890354620935824	47.66460936441846	48.251706382469166	6.484121514714707	482.0269804444789	240.7619296	81.246073	250.66402029980662
CL0655	654	7	25717	56.025197340280755	55.53125173628796	55.35434831209479	1.2776045120995714	3.3777160257806127	3.460702142857142	3.37069	0.357680236037493
CL0656	655	6	25657	58.4090111860311	58.59944805509252	58.60545825333175	1.2704669654714282	3.7700487391355186	3.7025585	3.5544035000000003	0.7257870046808385
CL0657	656	10	25637	61.50485626243321	60.87092070618802	61.82665673856311	3.6269214173854714	3.668633937629208	3.5815917000000006	3.454676	0.6664341291485679
CL0658	657	4	25632	45.25593008739076	46.13546112453596	47.110805580778674	2.2300364354905966	5.980336511665107	5.299114749999998	4.8753530000000005	1.2114573983783694
CL0659	658	5	25569	48.781727873596935	49.228364189633076	49.67845659163987	1.0448946372194792	19.3700010896398	17.742814199999994	21.028655999999998	6.927165003001369
CL0660	659	2	25542	45.9047842768773	45.58612440191388	45.58612440191388	0.6259968102073366	6.949266705426358	6.771828500000001	6.771828500000001	0.3485714999999998
CL0661	660	4	25445	43.02220475535469	42.87573168601904	43.51429322449372	1.3402679754006064	67.71730128351346	69.81448925000001	66.281311	19.471753175706233
CL0662	661	2	25433	44.00188731176031	48.6607987676113	48.6607987676113	5.239910452246857	27.091295434121022	15.5977445	15.5977445	12.9268775
CL0663	662	4	25418	46.65197891258163	48.61323345986577	49.71968474645523	3.39733607974949	16.903554347037534	14.707148000000002	16.6360915	7.430046743222919
CL0664	663	5	25407	50.745857440862764	49.791524088860776	50.38167938931297	2.4334397790665423	4.106912514267721	3.8010797999999997	3.4418089999999997	0.8791879541184354
CL0665	664	5	25374	49.92906124379286	50.08453087617469	50.37962282635317	1.8674144225107208	17.80861545558445	20.268229400000006	23.516934	8.246564648563973
CL0666	665	3	25374	38.10199416725782	37.9118427537657	37.836837429671306	0.9320725153346976	44.153820286553156	54.983837	40.09147	29.869092532187057
CL0667	666	5	25366	47.82385870850745	45.95151961031675	47.716447184085176	5.977043984900515	7.274490667941338	8.0450296	3.629626	7.039472032040544
CL0668	667	6	25355	58.27647406823112	58.52768229858719	59.0530400854221	1.6349114601859998	4.208098813172945	4.033728166666667	3.968457	0.807951030888716
CL0669	668	7	25353	46.680866169684066	46.85313461171644	47.425198453083645	1.2448819212309252	3.9941635807991167	3.950889142857143	4.144889	0.8514723904399666
CL0670	669	2	25345	42.430459656737035	42.3860393048186	42.3860393048186	0.10863975869658304	26.00111424636023	24.8790295	24.8790295	2.744305500000001
CL0671	670	6	25337	53.12388996329479	52.93694948610264	53.542606516290725	1.9894215913371551	3.5777889415084667	3.4793515	3.3924415000000003	0.35254130671962863
CL0672	671	2	25335	37.67515295046378	36.29700846901971	36.29700846901971	6.581581609309275	26.62783956463391	22.9289135	22.9289135	17.664899499999994
CL0673	672	4	25287	51.54031715901451	52.204336178572255	51.53546331893907	2.0033803265166643	4.502018219757189	4.44480225	4.564699500000001	0.2337572753738105
CL0674	673	5	25281	31.074720145563866	36.79184176348063	36.40570767450829	6.52778233747904	35.67427448827183	67.90271440000001	74.023361	49.18816927969516
CL0675	674	3	25225	43.75024777006938	43.78379833338127	43.604592095905716	0.31750406968984657	3.7344990179187314	3.7144163333333338	3.691065	0.35228821694490736
CL0676	675	1	25173	46.27577166011203	46.27577166011203	46.27577166011203	0.0	39.17191	39.17191	39.17191	0.0
CL0677	676	5	25170	46.499801350814465	46.2549851324008	46.95773339526242	4.8925158834339335	10.068671713150577	7.0933574	5.295433	2.8899778053526712
CL0678	677	4	25163	45.85701227993483	40.420498639457286	40.94177243602825	6.873330486611153	239.0780048361483	231.495225	171.3637335	218.63983406545918
CL0679	678	4	25087	45.270458803364285	45.94391193374074	45.77773112882516	2.5076100884837307	4.241584211503967	4.023067	4.095025	0.5617824611083904
CL0680	679	5	25046	49.7963746706061	50.230416704865426	49.84770819404204	1.5327301202854478	5.936040725904335	5.3313984	4.783766	1.1937055517661963
CL0681	680	3	25046	52.89467380020761	53.323309878610424	53.7100828600689	0.8790426809545369	4.3794289557214725	4.301531	4.233328	0.21446721030964172
CL0682	681	4	25035	50.68903535050929	50.82370519682621	51.37358766643271	1.7213532955538546	4.431332097383663	4.3868645	4.0025595	0.7912872288184929
CL0683	682	8	25027	61.2298717385224	60.76455065752386	62.53230688656296	3.93671868626308	4.2772967437967	4.208821125	4.1839685000000015	0.8416083229873675
CL0684	683	2	24959	43.12672783364719	38.54521013362242	38.54521013362242	5.750570795821872	6.019240885532273	5.1904780000000015	5.1904780000000015	1.0402359999999995
CL0685	684	5	24950	46.78957915831664	47.184638376813744	47.468504872831	3.3904272759788867	51.93961499663325	41.26359359999999	31.865692	23.51190748843331
CL0686	685	6	24909	52.434862900959494	53.39115886012861	53.73822802047367	3.3739170014584983	4.021885524950822	3.9922014999999997	3.837857	0.3891253210589744
CL0687	686	5	24908	62.03227878593223	61.16337671906932	61.50421179302046	2.3055332211593034	3.9153127413682354	3.5757661999999995	3.426326	0.6014325783408812
CL0688	687	4	24882	56.40221847118399	55.58875007008089	55.614737427666896	1.938004934076144	4.311814692428261	4.1539735	4.2503815000000005	0.4601918473932907
CL0689	688	5	24879	53.43462357811809	51.56966554124745	52.29411764705882	4.584294730259184	4.2422314076530405	3.8376286	3.799316	0.7222887630477439
CL0690	689	3	24854	56.393337088597406	57.6617142722005	57.56900606510707	2.1915079974911063	18.771757645650602	24.38944233333333	27.437640000000002	9.866157054144242
CL0691	690	3	24840	38.94122383252818	41.49207303905792	42.942430703624744	5.196761210574001	44.99735832427536	46.42286333333333	44.011093	4.578093914802704
CL0692	691	7	24814	53.566535020552905	54.131002677623265	53.20683111954459	3.4113992406421114	6.314431099661482	7.885943142857142	3.848096	10.193754510896383
CL0693	692	5	24775	38.79717457114025	37.96254799383546	36.71657754010696	2.6082533651460813	4.412605699212916	4.132153799999998	3.9328300000000005	0.45341176158825003
CL0694	693	4	24743	47.92062401487289	48.20017867242082	48.2738852410136	0.8962630126456544	38.888516171321186	36.8014385	37.23801450000001	3.987018638959976
CL0695	694	4	24708	49.17435648372997	49.93448516521399	52.01734612215329	4.0922836754465495	13.079091995709891	15.0212965	16.0750795	6.071823356702932
CL0696	695	3	24668	39.38706015891033	40.13193625173227	41.85291997116078	2.5576043837726576	39.223124147681204	53.158621333333336	39.873414000000004	31.68158106491527
CL0697	696	3	24656	44.47193380921479	40.749616131466546	44.74910394265233	5.897334040219612	58.41243331777255	56.33306633333334	52.002839	20.944208580143908
CL0698	697	6	24639	51.88116400827956	50.797839722374675	53.684713875287244	6.4278641231374145	7.254961214456755	8.519098333333334	4.69539	9.051172826635039
CL0699	698	4	24638	42.00016235084016	44.10377754184403	44.44450993310116	3.0491920492084224	13.689162492410095	16.28517175	17.528589999999998	3.6060807266048123
CL0700	699	7	24616	52.69337016574586	52.242801910927774	52.2360248447205	2.2856360379151077	3.648399763934026	3.627654571428572	3.5925019999999996	0.5389626457943754
CL0701	700	7	24614	58.28796619809864	58.584565467565156	58.03432137285491	2.1088540163365064	4.407602220240514	3.8401017142857135	3.437346	1.2517163907204394
CL0702	701	10	24610	60.73547338480292	61.66626786609112	61.037354157222175	3.3628896698569912	3.503422112312068	3.5692110999999995	3.5175919999999996	0.4731783019483142
CL0703	702	8	24538	50.19153965278344	49.72960207871499	53.851441006692845	8.006795823949767	135.6393077064145	143.203540125	172.9826835	81.07308493840661
CL0704	703	4	24537	45.832823898602115	41.14729730471407	39.4140436465737	7.36284265144813	44.732308310306884	79.35513900000001	40.5584325	84.61234709332824
CL0705	704	3	24492	41.86264902825413	38.769556887085905	41.207828245947134	6.392280301141307	53.95078856491916	46.38643166666666	52.062964	12.744686248264788
CL0706	705	2	24453	45.982088087351244	46.09474261648175	46.09474261648175	0.3316168533559818	13.273165966507175	13.423954	13.423954	0.4438689999999994
CL0707	706	3	24445	40.16772346083044	38.171792928371524	39.894086496028244	4.21152115524078	25.44895629159337	21.173445333333333	22.766679	10.68478588709218
CL0708	707	3	24440	52.704582651391156	52.24438755503892	51.84629240468328	0.6709361547460723	4.4284423617021265	4.590886666666667	4.390604	0.3203960175255339
CL0709	708	4	24427	53.76837106480534	53.160592773402	53.6166507622374	1.0964287191745168	3.80649882019896	3.54649875	3.8061905	0.6333831373104178
CL0710	709	4	24422	43.08000982720498	43.752653011292374	43.389074254563035	2.2295991940135105	5.4827458708132015	4.982037999999998	5.5180004999999985	1.240807155023092
CL0711	710	4	24392	33.609380124631016	36.221681838832176	37.383234841744006	4.581840222940233	31.119888288496227	45.79227725	46.7906655	33.09875258242282
CL0712	711	2	24352	47.659329829172144	55.679606186093785	55.679606186093785	9.673589392954735	6.600645647667543	4.9420660000000005	4.9420660000000005	2.0004820000000003
CL0713	712	3	24272	43.29268292682927	40.877164738869524	39.77695167286245	2.606728546555144	64.41637130409525	54.405225	56.240566	11.468312884361005
CL0714	713	7	24163	51.102925961180325	51.30475939034925	51.75380542686962	1.6807279429830873	4.905299947026445	4.837848428571427	4.778411	0.7296750977518021
CL0715	714	4	24106	49.82991786277275	50.023477925589894	49.9478813957081	1.1894423484982424	3.880509930432257	4.04332	4.03106	0.2447491577932393
CL0716	715	5	24052	61.91169133543988	61.59833522489456	61.61415016984889	0.9806021198471137	4.086925680026608	3.9729097999999996	3.8616269999999995	0.27824677419830035
CL0717	716	5	24020	50.30807660283097	50.75244364826937	49.510972302128714	1.7646377438440235	4.1744241863030815	3.9136622	3.903454	0.4124266045789966
CL0718	717	4	24003	39.12010998625172	42.09506116524796	40.959538772297954	4.955605537316483	34.12871928208974	32.740373999999996	36.2627235	20.975539140914318
CL0719	718	7	23988	63.448390862097725	63.51098906657578	63.985977935869684	1.5770970381493334	3.4995467852676336	3.428883714285714	3.351377	0.5894037172129896
CL0720	719	3	23987	42.48134406136657	40.208863764525674	42.9261883534325	5.20271136800694	21.146498050027102	28.38821166666667	19.633412	24.328737632016317
CL0721	720	7	23976	52.686019352686024	51.69131725464111	54.42504515352198	5.9326613921207265	101.00170706881883	91.85229157142858	86.961804	50.49855043164868
CL0722	721	6	23924	58.88229393078079	58.781383234971294	58.97072507774812	1.8930542880859509	3.479904416694533	3.4186595	3.467992	0.2861517013268487
CL0723	722	3	23919	38.17049207742798	41.59001017598136	43.386627906976734	3.8509327284069994	19.75466072774781	13.244398333333335	10.214561999999999	7.876347679252203
CL0724	723	4	23916	39.96905837096504	40.51258724353929	40.042885088462974	2.296541458632081	35.349677820036796	33.413489500000004	35.50721400000001	4.335596214467944
CL0725	724	3	23913	48.54263371387948	48.272756887365475	50.32201637910472	4.447819007439239	4.8722117487977235	4.525684666666666	4.555311	0.8912379297457864
CL0726	725	6	23880	38.18257956448911	38.09441729825372	38.182322667175406	2.3311336975873127	90.8893418830402	107.192577	78.38081	97.58094827451626
CL0727	726	4	23832	39.312688821752275	40.19940499327785	41.24281352711353	4.238427787189348	44.00654468714335	51.52447675	59.465169499999995	21.21440937227971
CL0728	727	3	23832	44.402484055052035	42.044889356181706	43.39020085721489	4.5543795613463685	7.063618406889894	6.700320333333332	7.090978	0.6476962209216771
CL0729	728	7	23821	42.64304605180303	44.42405894183935	43.82284382284382	5.4844790901600335	303.4672517769195	414.1040025714285	152.06742	407.10895415810506
CL0730	729	5	23770	53.007993268826255	52.87738109348986	52.775003566842635	0.897312212497348	4.342423985485906	4.1915192	3.93699	0.3898235937299846
CL0731	730	5	23735	46.61470402359385	44.820049580655244	47.11876317638792	6.756998707778113	19.79317148940384	14.1866642	12.596491	5.775942008614608
CL0732	731	2	23712	58.502024291497975	58.458394612495354	58.458394612495354	0.11242631476964604	4.084311013031377	4.1079965000000005	4.1079965000000005	0.061033500000000185
CL0733	732	4	23678	51.86671171551652	52.080612733150275	52.02766030660057	0.7089549217371773	3.880086156558831	3.82243325	3.9529504999999996	0.3711192765758573
CL0734	733	5	23640	57.37309644670051	57.88211074503708	57.625444488344534	1.439977781991759	4.005415597038917	4.0033696	4.135373	0.3045801277953637
CL0735	734	3	23628	51.23582190621297	52.07779444056808	53.80765883376849	2.4476245763389706	13.80925937819536	14.192212333333332	16.417447	6.7231995593736125
CL0736	735	5	23617	51.66193843417877	49.493618141034275	53.261163734776716	6.49988539363738	5.606613102553244	8.116014999999999	4.479247	7.122598706352845
CL0737	736	6	23605	37.11078161406482	36.954775530701106	38.03758571502226	3.918066036330623	90.34392643524677	89.99012549999998	90.364135	51.51776096807914
CL0738	737	5	23583	58.474324725437825	57.7124795526524	57.02583490863264	4.20298025425189	3.408357044226773	3.3517504	3.484536	0.45500962556438296
CL0739	738	3	23532	44.356620771715114	44.83514039785234	44.92076577814418	1.0216694261875172	35.30727135258371	42.89460499999999	39.016673	14.324110547809406
CL0740	739	6	23525	44.93517534537725	45.31547852444911	44.625534197147545	2.1598380828938115	125.07035887200851	128.0715655	97.056824	86.27176425445582
CL0741	740	4	23515	47.51860514565171	44.47728733135102	44.987392055267705	3.8921353613895775	338.6399728395067	150.24576175	40.910157500000004	192.10764139550187
CL0742	741	4	23509	45.08060742694288	43.16684463511113	43.164211185473796	3.78441378614194	111.67672526781234	185.19317625	114.184759	178.06510874436265
CL0743	742	4	23485	44.61145411965085	44.82906476497613	44.89382527684202	0.3576707729713182	5.653192627890142	5.43535825	5.358988	0.39973130960895137
CL0744	743	5	23405	51.29245887630848	51.79357629296318	53.6864406779661	4.421457986312637	3.6093603335612054	3.5543462000000003	3.584046	0.5270967218685391
CL0745	744	2	23400	36.92735042735042	38.85418966096811	38.85418966096811	3.797207180954501	12.939153580769231	16.50981	16.50981	7.036664999999999
CL0746	745	3	23383	56.80622674592653	56.777163168749674	57.08609271523178	1.01226200692782	4.100299566822049	3.84318	4.017469	0.4936384555340073
CL0747	746	7	23382	53.96031135061158	54.41042087068016	55.10852302805718	1.2893317685521015	3.437515160465315	3.4800454285714286	3.3553290000000002	0.667041249910562
CL0748	747	6	23376	57.10985626283368	56.53328094461704	57.08674227027528	1.8060174878734632	47.015861617941496	45.42837966666666	34.989740000000005	30.68908374237197
CL0749	748	4	23349	38.378517281254005	38.07362284452122	38.24097032021655	1.6286526345530832	4.296647190329351	4.1820270000000015	4.4110879999999995	0.5695119335202733
CL0750	749	4	23312	40.455559368565545	41.365733895850795	41.3907505885189	1.6319736555113078	56.31448287461394	67.8984955	70.54005450000001	16.27171439766917
CL0751	750	7	23298	45.943857841874845	48.82442610436826	46.077457795431975	7.723946376675227	755.4919034683237	800.6987581428572	439.32908899999995	661.1625706310202
CL0752	751	6	23297	61.153796626175044	60.24106400741336	61.98050088555347	5.1166254191133484	3.300362707301369	3.2146260000000004	3.3007405	0.36880270645201796
CL0753	752	6	23279	48.034709394733454	48.405884390217096	47.729556307202536	2.2372943806122416	4.7805536389879295	5.301942	4.2117275	3.184825161083363
CL0754	753	3	23279	32.282314532411185	38.82712704756728	29.940764674205713	12.782858061464493	6.308371464281112	5.128847666666667	6.0837449999999995	2.0047342108335013
CL0755	754	4	23277	61.01731322764961	61.948928069694745	61.78732785854866	2.155094894429769	3.869145632856468	3.7709085	3.7155185	0.5205724854900133
CL0756	755	2	23275	49.12567132116004	46.81459898335599	46.81459898335599	2.5397898230506404	9.41685643209452	7.945375	7.945375	1.617108
CL0757	756	3	23267	50.90041689947135	51.88043146264072	51.56555772994129	1.1050905810473473	23.137096069841405	20.79683933333333	23.623987	4.253329545103407
CL0758	757	3	23265	46.57210401891253	46.577620812805776	46.90297171500179	0.4918585853521626	4.5806351914033945	4.62007	4.497407	0.19426786349951627
CL0759	758	5	23238	40.39073930630863	40.78219376346157	40.458422174840095	1.4388520950906662	5.030361584473709	5.2411389999999995	5.003287	0.6461901521790623
CL0760	759	5	23229	56.4811227345129	56.28589512228482	56.944444444444436	1.8933409029120911	3.5823305394119416	3.5179047999999997	3.48751	0.4026768306557505
CL0761	760	5	23226	47.976405752174294	48.2819132158216	47.33965766137347	1.6671462767888898	4.472916053948161	4.2653934	4.309648	0.5698499483252061
CL0762	761	5	23207	58.637480070668325	58.55257630475924	58.99373091142903	0.7963320273101753	3.3352362891799885	3.3666417999999996	3.350325	0.19714971345188398
CL0763	762	4	23207	46.40841125522471	45.73581356619538	46.022412794509286	1.419181545431219	4.093620585254449	3.73218125	3.5576239999999997	0.7492718300938502
CL0764	763	5	23193	58.03906351054197	57.41656862152261	59.47668567594768	3.5157142046542846	4.483559676712801	4.4727692	4.6037669999999995	0.3741110256361874
CL0765	764	3	23137	49.98055063318494	49.485513482702466	50.546448087431685	1.7171177334938184	7.657662078877988	7.706690666666668	7.517653	0.3175632455268642
CL0766	765	2	23134	42.63421803406242	42.086141074370005	42.086141074370005	0.6826323024401901	55.57561241618398	35.083759	35.083759	25.522695000000002
CL0767	766	7	23131	50.01945441182829	50.03199524534015	49.62142197599261	1.9634258108016056	14.44724258678829	16.23926557142857	16.920333	5.7252197292556835
CL0768	767	5	23039	47.818915751551714	47.694706716173904	47.94776119402986	0.5287439144521362	5.099934889795564	5.063628	5.140291	0.4519155809148432
CL0769	768	9	23037	49.0081173763945	46.42336789035729	51.21687398593834	9.682069204608974	128.7649654342579	101.15211033333334	96.089404	85.99345150699708
CL0770	769	7	23026	56.014939633457836	54.30100622400674	56.530028598665396	5.442002492241113	3.802710979327716	3.5672560000000004	3.326661	0.6863534531949055
CL0771	770	4	23018	56.96845946650448	57.44695780940671	57.279575504436515	1.1043427674522064	36.56102141615258	35.736042	39.4189055	8.05139638826828
CL0772	771	4	23013	51.253639247381905	51.50537987440586	52.46690949795085	2.4790068136775267	4.033218713422848	3.9855045	3.902725	0.645197559636775
CL0773	772	3	23007	45.307949754422566	43.64100906540864	44.220572640509005	3.795342514736836	4.073455647542052	4.109283666666666	3.9586330000000003	0.2554436777143295
CL0774	773	4	22973	48.191355068994035	48.00319355727925	47.65688814338911	2.3501988247173284	4.0321955204370346	4.63372525	3.9056405	1.8866623258240165
CL0775	774	10	22950	61.782135076252715	61.847538963561114	62.559083128039674	2.179194775177314	2.457668555337691	2.4958926	2.4300740000000003	0.245753031537436
CL0776	775	4	22901	40.063752674555694	40.13055274754603	40.06849475388702	1.2550328975906209	62.22784275407189	65.5034	64.009985	10.13786814077099
CL0777	776	7	22889	63.8953208965005	63.42946186469258	63.617354939885	1.9196243887760456	3.5212506472104503	3.426023285714286	3.280212	0.22271456350335464
CL0778	777	6	22854	42.4739651702109	42.39100386107257	42.97336718432753	3.176796463170781	119.85219432900148	131.2597055	141.3113935	64.62703353375551
CL0779	778	10	22844	57.9714585886885	58.663670377271345	58.56000104708159	3.658191940953848	2.8601751713797934	2.5571242	2.2103775000000003	0.89716679017302
CL0780	779	6	22793	52.25727196946431	52.56887289212384	53.07677702645167	1.558281822370035	3.400111109156319	3.294354	3.4168475000000003	0.3205736114363335
CL0781	780	9	22666	56.96638136415777	57.28736812351527	58.664627930682975	3.938066466083152	3.554446458792905	3.4628108888888893	3.378858	0.4784164462026884
CL0782	781	6	22638	39.716406042936654	40.44132180220392	42.30051040726924	2.8038471732811865	104.94919141165295	132.74260516666666	158.0390535	55.399002272847994
CL0783	782	2	22613	53.09777561579622	54.280305615507096	54.280305615507096	1.8604710835220253	4.261489537168885	4.246421499999999	4.246421499999999	0.023706499999999853
CL0784	783	3	22422	44.05048612969404	43.373300499001296	46.05242000321595	4.662117797077987	66.42440583926502	74.349878	32.210945	61.78992031083252
CL0785	784	5	22392	34.918720971775635	37.17575014078193	37.369882026370576	2.233718292065168	28.80952797856377	19.2260828	4.166608	19.618874439567847
CL0786	785	2	22357	52.39969584470188	55.447940533883674	55.447940533883674	3.8417952824870376	11.485155764324373	23.11983	23.11983	14.663533
CL0787	786	4	22355	54.34578394095281	54.55257364187999	54.67158741623742	0.7801156351151557	165.42889598895104	147.51626175	165.9299935	49.40195273166125
CL0788	787	5	22298	48.502107812359846	48.83891681195402	49.702244617498856	1.9615887154537024	3.2338003108350524	3.2861584	3.270975	0.34389964582104465
CL0789	788	7	22285	48.06371999102535	46.41001770584326	45.95222295952223	5.394220105996399	261.3029571129011	367.97048600000005	69.11428599999999	528.7839824028092
CL0790	789	3	22252	48.06758943016357	48.073673455949354	50.41576052193936	4.021462308958155	3.5496234351968363	3.553116	3.706034	0.4174739482842013
CL0791	790	5	22244	57.38176586944794	60.282231810973215	62.31751824817518	5.072402903735936	3.9560705924294193	3.8519263999999995	3.86499	0.3891337657380041
CL0792	791	4	22229	55.88195600341896	55.62969075863429	55.9939435676605	0.9198745589362282	3.5941544965135632	3.66992425	3.608047	0.5413445089720477
CL0793	792	12	22207	60.494438690502996	60.87862663236416	60.34966682098605	3.4287977764026625	2.2979238309992343	2.245895083333333	2.2831785	0.4580393615082767
CL0794	793	5	22174	64.17876792640028	63.913014388551396	64.36934539648749	0.8883773785471217	4.1784576292053766	3.9872707999999997	3.985123	0.2972163987901071
CL0795	794	3	22174	37.32750067646794	37.72005750299664	37.587168758716885	0.6008410441445026	31.75014276409308	34.692201000000004	33.841224	4.411172352291924
CL0796	795	4	22138	53.378805673502576	52.447638726843316	53.09934624528197	2.1341985796360965	3.4292469111934234	3.4330495	3.4475425000000004	0.3906740768789885
CL0797	796	3	22114	62.68879442886859	62.79755010972146	64.77565755544094	3.2212272617542066	5.2274720373519035	5.274965	5.343415	0.4719178647716852
CL0798	797	4	22110	47.62098597919493	47.44221898651253	47.40581479711915	1.2340535468320113	5.736034093170511	5.3389675	4.4424885000000005	2.0936250967793284
CL0799	798	2	22103	41.093969144460026	40.77817381130188	40.77817381130188	0.7961702120217389	35.22413594290368	32.8858805	32.8858805	5.895113499999999
CL0800	799	5	22096	45.804670528602465	47.63030736308962	48.17582417582418	3.0638736475739257	81.58702246474475	73.5142732	12.696442999999999	76.11116621070293
CL0801	800	6	22066	49.43351762893139	49.25073567619446	50.098613367061326	1.7280315507056	14.230386666228588	12.280642	11.504201	6.894809071039218
CL0802	801	4	22047	40.114301265478296	40.36380158124467	40.149536283156216	1.0191371044737183	219.20552033278904	107.016828	27.473146000000003	139.1958031672375
CL0803	802	4	22015	43.870088575970925	39.53181018255157	43.608845009683	9.332885646090087	4.8909441081535325	4.209585499999998	3.7882495	1.8151287395067188
CL0804	803	5	21994	46.14440301900518	46.704103556261394	47.00493305144468	1.873433984723732	3.674926221105756	3.6404236	3.8681949999999996	0.4591078811022961
CL0805	804	8	21970	62.14838416021848	61.843534724844496	61.9808016141933	2.4500112661486337	4.012356307146108	3.943582625	3.7423545	0.6449120568912744
CL0806	805	6	21952	60.64595481049562	59.02646278353297	58.5534993284879	2.5364283127509792	4.173046065051022	4.067509500000001	3.840042	0.7655090271646595
CL0807	806	7	21925	55.315849486887124	54.68784461762949	54.630294328786796	3.0374671302774745	3.1176735738198413	3.0257512857142856	2.95573	0.34200662658271674
CL0808	807	4	21849	53.53563092132363	53.119394246412476	53.02107261297003	1.6304591461147486	3.401527517048835	3.36463175	3.3288585	0.24061147993224985
CL0809	808	5	21843	41.87153779242778	37.870236674714974	36.01637107776262	7.0393378017916834	183.43842172302342	151.52276980000005	172.088256	79.60426694131026
CL0810	809	4	21833	43.196079329455415	45.87598009731768	47.580924439088925	3.905925075102263	90.77620311560482	79.29446899999998	80.82464350000002	20.938242262927094
CL0811	810	2	21821	41.166765959396905	42.8121773571256	42.8121773571256	1.9936988233570856	65.74422557174282	37.12908	37.12908	34.672169
CL0812	811	7	21810	61.31132508023842	61.725691564854145	61.62187647336162	2.0636639906833003	3.5261683131591006	3.451356428571428	3.620803	0.5387066228874638
CL0813	812	6	21760	47.215073529411775	46.78860516302882	47.50965137700801	3.131088028189608	5.474346931387868	4.9393036666666665	4.9306345	1.1648860994706258
CL0814	813	6	21756	51.99485199485199	51.09475021008954	51.582643313781176	2.0017230936865307	3.599082360728075	3.2530965000000003	3.199199	0.6313439799292591
CL0815	814	3	21754	41.2475866507309	40.033710288184686	40.09135628952917	1.476006599426387	42.33371616530293	56.23312466666667	46.331651	23.19698779750009
CL0816	815	5	21739	61.35976815860895	61.88199105887443	61.18153010411951	2.19040244175808	3.3746913806982852	3.3095665999999997	3.543651	0.30397695054829404
CL0817	816	6	21693	59.728944820909966	59.944518052930796	60.17370663546127	0.7012599588393503	3.4147156830774907	3.342693666666667	3.3396730000000003	0.3479509500588967
CL0818	817	5	21681	63.5441169687745	64.51105302248196	63.26893182322896	2.459289477079631	4.511690815322172	4.5277704000000005	4.392387	0.3035370911928886
CL0819	818	3	21670	41.66128287955699	37.61779964319452	39.238363892806774	5.067344115628133	49.90830588264882	55.90156433333333	51.807158	23.174585107654554
CL0820	819	7	21666	60.92495153697037	61.453366015413906	60.536237955592796	3.462067971522917	4.072891225006923	4.0029517142857145	3.793532	0.9874342699803532
CL0821	820	5	21660	50.794090489381354	50.778537270205625	50.578034682080926	1.2607963760482777	3.3134843787626966	3.3772738	3.1947360000000002	0.25417297919361936
CL0822	821	4	21659	53.20190221155178	51.6191992391803	50.49262514848506	2.914520760676433	3.88281580603906	3.7045387500000007	3.949568	0.4696146823233783
CL0823	822	4	21621	54.1741825077471	53.07171635137805	55.72385049825851	5.261292677998388	19.495508675500673	18.71884625	17.779436999999998	4.530641804874414
CL0824	823	4	21580	43.69786839666358	43.02582790840887	43.85440625583836	2.0117412871695803	56.413521089481	65.08520475	53.03473150000001	22.481957529224065
CL0825	824	6	21550	46.39907192575406	46.3905589386935	46.53861984383255	1.058606875041038	3.416751232018561	3.319637	3.295778	0.3900792327677374
CL0826	825	5	21531	46.15205982072361	47.54070402831577	45.02585944630361	4.377679264866671	15.971161555663926	8.8101004	4.456492	9.43061327768252
CL0827	826	4	21511	51.38766212635396	51.89640545740583	51.73843487744982	2.3220202808035664	3.903175023801776	4.09914425	3.9673800000000004	0.5949366251258932
CL0828	827	4	21499	49.96511465649565	50.56147309121656	50.773940011917325	3.1852175113260186	3.774012634913252	3.854482500000001	3.7363555	0.2821113172796336
CL0829	828	6	21449	39.94125600261084	38.13531190431447	37.90439245199253	2.7563213605605505	33.551615773089665	42.57268816666666	16.2545555	54.58208287054287
CL0830	829	7	21423	60.999859963590524	60.19501755259002	62.012987012987004	4.5967136766286005	3.7987310273070993	3.763974571428572	3.746111	0.5776327064579699
CL0831	830	7	21409	36.872343406978366	37.72490184240069	37.15308863025962	2.36012660088725	36.13644497715913	41.88558428571428	33.317977	25.3163964469337
CL0832	831	4	21391	58.23944649618998	58.35179546752864	58.14662923040982	1.0800671076099342	3.853528623954	4.011592	3.807983	0.6605560708138258
CL0833	832	5	21380	51.43592142188962	51.95881573711579	52.022315202231525	1.00260093875213	5.5637017727782965	5.380153	5.471347	0.6815162831662938
CL0834	833	5	21374	56.05876298306354	55.298322289764954	55.20200559251761	4.520955180423468	21.41171916477964	26.6658606	30.296090999999997	14.504296562847998
CL0835	834	3	21374	39.81940675587162	54.44994148417777	62.44648318042813	13.106520659308918	45.92425434209788	19.366165666666667	3.145525	23.759059827126517
CL0836	835	7	21352	55.470213563132255	57.99265446033213	58.99543378995435	3.849689641363436	5.591408974194454	4.495941285714286	3.8899239999999997	1.5570302110614032
CL0837	836	5	21349	54.92528924071385	55.166928488406064	55.8509791434485	5.34063034555221	3.7509875097194247	3.7634046000000003	3.690687	0.5727922816144086
CL0838	837	4	21347	53.056635592823355	52.77639402082694	53.39748702521727	1.5374942126252449	4.2192552962008705	4.34609925	4.3048335	0.33926260946674835
CL0839	838	4	21326	47.73984807277502	47.30006515307	47.186206004140786	1.7148116474815176	4.296323153896653	4.161407	4.134771	0.6608686608672709
CL0840	839	3	21262	39.14495343805851	41.269647182652356	40.56348900038595	2.758243684391083	11.018133473144577	13.582257	11.762364999999999	4.149499036019649
CL0841	840	6	21254	44.99858850098804	45.86053649998424	44.393929272316825	6.781991424357276	143.3863515957467	191.37299616666667	128.77992450000002	186.38573343633652
CL0842	841	6	21243	54.91220637386433	53.801053933130646	56.51469916719606	6.120475304535862	79.93232158696982	64.67297700000002	34.514447	80.80132805023987
CL0843	842	3	21243	55.84898554818058	57.15768388214935	58.878023674729796	3.0836835365178588	4.844385335734124	4.935907333333333	4.947931	0.20641281735449998
CL0844	843	8	21228	46.82023742227247	47.280375214033505	47.18372254605438	2.342835928142289	3.5817697338420955	3.579519125	3.512274	0.6067111962815253
CL0845	844	3	21211	35.44858799679412	36.241923157441626	36.47778749105937	2.8336955114244664	40.37707320409222	30.000566999999997	41.666667	18.383366083473852
CL0846	845	2	21204	48.76910016977929	49.611234235710825	49.611234235710825	3.934907609963013	628.4737619028957	605.9315385	605.9315385	105.32950749999998
CL0847	846	3	21142	48.301958187494094	44.013178907193435	41.43475572047001	3.8851613433796914	18.243949872859712	11.648039	8.369537	6.016491581049098
CL0848	847	4	21121	46.6076416836324	46.24982546906914	46.34246775699315	1.4299616988385653	4.277972909237252	4.29947	4.2002095	0.2943175570799335
CL0849	848	4	21111	49.012363222964325	48.431447578633424	47.47092505561442	3.574793528251437	4.729268708682678	4.4696335	3.850953	1.2871745089368225
CL0850	849	6	21097	63.43081954780301	63.84144363639868	62.59348193562765	4.0772004090814615	3.615920507749917	3.598577333333333	3.6056855000000003	0.41748186472335397
CL0851	850	6	21091	63.84239723104642	63.3059152219253	63.96786944645334	1.7944933446251592	3.6439253556493294	3.450895	3.4969400000000004	0.4775793241448656
CL0852	851	2	21089	38.44658352695719	37.65555328670853	37.65555328670853	0.922219953375194	43.62517929109961	25.708322	25.708322	20.888308
CL0853	852	5	21070	54.17180825818699	54.43656631305912	54.325798908807485	0.8413752655730902	218.59512199401988	186.3613754	198.281118	53.37213040501985
CL0854	853	7	21066	51.48580651286433	51.76814129785173	52.415966386554615	2.5595417481575597	99.89511737757523	104.0949482857143	99.546934	38.807991593878825
CL0855	854	5	21050	45.85273159144893	45.75082780069173	45.95767769940315	0.7326845887801552	4.363080669453682	4.2322726	4.434865	0.3796454813878865
CL0856	855	4	20981	38.372813497926685	38.75369107816226	38.47073996561458	1.420069803482901	32.98831773733378	35.30695	28.9393965	28.992271183044966
CL0857	856	6	20972	49.57085637993515	48.3331760753396	48.97698222857895	4.067689536234335	3.411174716097653	3.669825666666666	3.3555045000000003	0.7663519482606468
CL0858	857	5	20946	56.440370476463286	57.766408384708825	58.775510204081634	4.149072816970722	4.4756675440656934	4.1093006	4.036196	0.8387506177475162
CL0859	858	2	20941	53.836970536268566	53.2036004045975	53.2036004045975	1.1668341626923358	88.28072883100138	159.2028135	159.2028135	130.6571105
CL0860	859	2	20920	33.44168260038241	33.73886643517201	33.73886643517201	0.5641638678582943	12.374564126195027	16.580935	16.580935	7.985233999999998
CL0861	860	3	20911	49.24202572808569	46.145011539056476	44.84425349087003	2.9364953714144195	19.800356138396054	11.564170333333333	8.432732000000001	7.943903422480341
CL0862	861	5	20896	46.525650842266465	46.72930185885532	47.17918737211342	1.6790259969432857	3.3047766682618684	3.1888906	3.3478839999999996	0.4274610460589831
CL0863	862	3	20881	39.26536085436521	38.970541341003276	39.25729442970823	1.8099868928396439	5.180760934725348	4.882347333333333	4.821586	1.459475968111462
CL0864	863	4	20873	59.00445551669621	58.5734351677581	58.927324603199025	1.0958412026834459	4.8583130903559635	6.42446975	4.7482155000000015	3.8586722701754144
CL0865	864	5	20852	49.17513907538845	49.020162453700074	49.16779891304348	1.2392763144304957	4.6704485976884715	3.9416432	3.5719300000000005	1.1374712538274363
CL0866	865	6	20846	58.15024465125204	57.506447196413724	56.89169532394077	1.7127343348606952	4.194691693562314	4.149025666666667	4.3967825000000005	0.627336032641908
CL0867	866	7	20822	57.746614158102005	58.00290435041856	58.93805309734513	2.7395288931603163	4.781972181730861	5.635179571428571	4.363409	3.0694669852932286
CL0868	867	3	20816	42.0445810914681	42.549283872657135	42.405708460754326	1.0169768400421821	54.425208171406624	51.79311033333334	53.630244999999995	4.292164421029118
CL0869	868	6	20799	59.0653396797923	58.239677175522786	60.869206760167856	5.626742022774884	59.2586024075196	61.96632283333333	62.3675225	11.979688806915135
CL0870	869	6	20779	62.1925982963569	62.021327440456545	62.38422740165248	5.713016340166647	3.9335329454256702	4.029726	4.010287	0.18413998307990226
CL0871	870	8	20764	59.054132151801184	57.05804034737816	58.09246956601537	6.328879355276394	357.44720431631674	300.962606375	341.27837949999997	190.83474910861557
CL0872	871	7	20740	57.48794599807135	58.11487429150058	59.041147602869	4.5944962175412645	4.045400863307618	4.034224285714286	4.252336	0.4726875187900758
CL0873	872	3	20719	43.631449394275776	43.53044322756495	43.485099337748345	1.7225060214925672	4.392596171822964	4.143166666666667	4.6103760000000005	0.7235018266525354
CL0874	873	5	20717	33.78867596659748	34.592872506189735	33.29448329448329	2.5828533702336287	44.920465205531684	45.96484940000001	45.936776	15.558444585034337
CL0875	874	3	20697	38.59013383582162	36.314103507516464	37.508602890571225	3.2989259604559185	128.03391216413007	130.10865466666667	118.86566100000002	92.38259572962276
CL0876	875	7	20696	61.074603788171636	60.640032075439976	61.742050167884656	5.271671701089948	3.6498938608909928	3.574251571428572	3.551772	0.5756096456401326
CL0877	876	2	20686	27.38567146862613	27.447888809823088	27.447888809823088	0.18636373008983045	5.921916511166973	5.866985	5.866985	0.16454000000000013
CL0878	877	4	20682	51.29097766173485	49.875444765847675	48.94587567801109	5.546604931274599	3.778852199497148	3.7755035000000006	3.7685955	0.4655977673649756
CL0879	878	6	20665	40.8952334865715	40.892249305613156	41.59396801955492	2.942608563652743	168.04822768187756	197.31046616666663	150.2912245	82.19206525336489
CL0880	879	3	20661	56.27994772760273	56.607200715773104	56.052419818369934	1.7749067342501568	4.061527943952373	4.132371	4.125724	0.4763530051428949
CL0881	880	5	20642	49.21519232632497	50.331899693056116	51.40845070422535	2.394801633455484	9.718341278073831	13.852454000000002	7.491453999999999	8.685207721392182
CL0882	881	6	20622	40.3549607215595	40.002010009134544	39.81024501704583	2.006508166056995	59.664439525409755	59.29254366666667	58.846670499999995	13.390439563436232
CL0883	882	2	20618	42.346493355320604	44.44483824773289	44.44483824773289	3.6071098042151633	4.499484418663305	4.527662	4.527662	0.04843799999999998
CL0884	883	8	20606	52.84383189362322	55.46313829055433	56.4011811023622	5.071269776122403	68.5624176939241	25.440935	7.2967015	47.40116330846925
CL0885	884	6	20578	51.22946836427253	51.66928615024372	51.660677507212505	0.9031443248999784	22.499577767129946	21.394296166666667	22.6649305	9.443053914238822
CL0886	885	5	20558	52.35917890845413	52.77621780897928	52.580047631648576	1.6030538137133372	3.4632615308882198	3.5827299999999997	3.391668	0.6335710709409007
CL0887	886	3	20542	45.76477460811996	45.35495492871786	43.883199557154725	4.151823664964417	3.4245867167753867	3.4035886666666664	3.3706910000000003	0.19682953895241992
CL0888	887	3	20494	57.43144334927295	57.719487717141114	57.5214899713467	2.6920597525902763	159.3160683182395	347.35793766666666	296.717855	243.9156149523489
CL0889	888	2	20445	59.59403277084862	60.411286896726075	60.411286896726075	1.50570069420246	4.069650527953044	4.221398000000001	4.221398000000001	0.2795779999999999
CL0890	889	7	20428	57.04914822792246	57.36678630439409	58.54214123006834	3.083330255072166	3.391782520119444	3.361440428571429	3.39705	0.3366547427697816
CL0891	890	3	20422	54.715502889041225	54.49353089922284	54.16191562143672	0.8252291136042819	3.974150310939183	3.732736	4.029472	0.4671102338827528
CL0892	891	4	20404	43.653205253871796	43.81194119390965	43.53753953933246	3.1576000058650626	25.86757850352872	26.360928499999996	25.361732	6.667018887898343
CL0893	892	4	20340	50.403146509341205	51.206418028569345	51.4410829060329	0.8002858392408281	4.288401876007867	3.97579775	3.9252964999999995	0.9527355128631909
CL0894	893	4	20321	61.9752964913144	62.12050910473996	62.330604313074	1.6242616826694598	3.4606549637321	3.4548032500000003	3.4074355000000005	0.21395192999056475
CL0895	894	2	20292	55.982653262369396	54.260872771351735	54.260872771351735	2.3261231507144124	3.5542359156317764	3.496395	3.496395	0.07814300000000007
CL0896	895	7	20291	58.912818490956575	58.933975821160224	59.85130111524163	2.357540739812868	3.8116079441131534	3.7525468571428577	3.508687	0.5918566687333365
CL0897	896	5	20282	53.43654471945568	53.285798702138656	53.634639696586596	1.908995521307805	4.3932920837195555	4.2090276000000015	4.042987	0.4774459713440257
CL0898	897	4	20264	49.53118831425188	49.0479876076704	49.78400770563166	1.9884014628695277	19.316308952477296	18.748686	17.9566235	2.8825864240116887
CL0899	898	6	20261	50.59967425102413	52.141706398830756	52.570956259999754	3.0499136014011765	87.18475882641528	71.14044666666669	85.677904	40.40165102493554
CL0900	899	3	20251	37.08952644313861	38.467910460616075	39.2632241813602	1.7472068143155195	56.71308402770233	68.293231	55.218939	24.68600610075179
CL0901	900	6	20235	48.994316777860135	47.533319681667564	48.074574892790366	4.309488041837311	65.94489620385473	54.636546499999994	52.4201925	26.301446125231646
CL0902	901	5	20233	45.90520436909998	43.84320435555152	45.72633192794174	5.4516734664656665	14.349427698462907	15.6687634	18.554553	10.055069150299241
CL0903	902	3	20229	53.003114340797865	54.378981776019074	53.41633173218311	2.4367899771095587	249.4292250432547	202.430558	119.36157	172.48906621040908
CL0904	903	5	20224	53.762856012658226	53.65449970527407	53.17627261253681	1.3770696269184757	3.367644343156645	3.3942062000000006	3.4290839999999996	0.37498996782442057
CL0905	904	5	20220	49.366963402571706	47.96018783362465	49.324804548685144	3.1916271111790278	4.533727332690407	4.0523326	3.863422	0.6598329476428407
CL0906	905	3	20179	42.56900738391397	46.17390688516497	48.72192099147947	4.764676170462041	11.424383773328707	14.123732333333333	14.467308	3.3717397733910137
CL0907	906	2	20175	46.572490706319705	49.60219612504972	49.60219612504972	3.537900493307763	1495.2283617884016	830.3623210000002	830.3623210000002	776.3889780000002
CL0908	907	4	20163	56.09780290631355	56.04830623448886	60.28456699464314	10.021884943172363	4.525104022566086	4.51915625	4.569751	0.3151751669916073
CL0909	908	2	20160	36.805555555555564	35.78257621610722	35.78257621610722	1.3947831383253195	13.129743324107144	20.554354999999997	20.554354999999997	10.123101
CL0910	909	3	20100	50.164179104477604	48.0753805828714	50.22535037352596	5.293176107390666	24.476683416716412	20.60843833333333	24.73965	8.928902352539357
CL0911	910	6	20098	51.34839287491293	51.130648060195476	49.55778489423349	3.3612751719834133	3.5845684370584143	3.526374666666667	3.5567635	0.4905717434122715
CL0912	911	4	20077	50.25651242715546	49.370335484613506	49.03462860660197	1.6711644813747382	3.900218610150919	3.6913655	3.691075	0.3720017493658464
CL0913	912	2	20056	50.363980853609895	50.51204945754286	50.51204945754286	0.3209753480846871	3.6718565031910653	3.7274519999999995	3.7274519999999995	0.120517
CL0914	913	4	20039	48.215978841259535	48.46857618290396	48.87942120720496	1.5731225646265643	17.44206997180498	18.08869025	18.193607999999998	3.1658230552813102
CL0915	914	7	20036	56.35356358554603	56.11305009090226	55.636743215031316	1.3846594353082229	3.65657385491116	3.618540857142857	3.301257	0.5839219078733116
CL0916	915	6	20030	58.1228157763355	57.04498616514021	58.319834134629794	4.2709462752129665	3.901646427658512	4.1256208333333335	3.638741	1.3467948048646727
CL0917	916	3	20023	42.381261549218394	43.49610381239497	44.46284413164976	1.5899992613343918	4.038374968985666	4.493865666666667	4.380084	0.6939745764134465
CL0918	917	3	20003	44.09338599210118	43.91376147833995	43.37595907928389	0.8891931689853766	51.498766745488176	51.81874866666666	52.676345999999995	1.4369359240713864
CL0919	918	6	19995	58.71467866966741	59.00841297001664	58.57730792851901	3.5674425646899515	4.638158779144788	4.8196345	4.5633979999999985	1.281636151009944
CL0920	919	4	19969	47.77905753918574	46.246134346793816	47.603573563822316	3.27599509656378	4.5015053371225395	4.18672875	4.2815535	0.6435883761370208
CL0921	920	5	19960	50.190380761523045	50.27312536461493	49.03444676409186	2.3470001598605763	4.599541016933869	4.2978314000000015	4.026322	0.7658846844609443
CL0922	921	4	19926	60.30814011843822	60.550510563108126	60.64102281636636	1.0603950426021016	3.1738246890494834	3.33862875	3.221159	0.5143729226477491
CL0923	922	3	19916	61.6589676641896	61.37004142150784	62.98676459337465	2.690066497059	4.66502749091183	4.550192333333333	4.509777	0.16096729589232986
CL0924	923	3	19867	36.94065535813157	38.52856141790822	37.76246719160105	3.504902799341201	47.46277032153823	63.47460066666667	49.816164	32.83304544348258
CL0925	924	5	19862	42.93122545564393	40.61484319073137	37.73314203730273	6.0497896531152096	27.18388052668412	31.7843816	17.546675	23.67578288303861
CL0926	925	4	19858	39.85295598751133	39.69810314075177	39.27662493348976	1.0779803975916191	98.79690210746296	85.94623449999997	100.670192	49.95859452365697
CL0927	926	7	19854	54.432356200261914	54.30164432351852	53.50444225074038	2.129156881448413	3.709322389845875	3.5594587142857144	3.524396	0.4995474207141942
CL0928	927	4	19835	46.851525081925885	45.83376299963865	47.39672783072145	2.880770512957376	4.034933414217293	3.704512	3.4557675000000003	0.8344115131231712
CL0929	928	6	19831	56.55287176642629	55.82899758314314	57.6306650023837	3.910838569754135	4.033760291412436	4.129773166666666	3.8919089999999996	0.9344851133097158
CL0930	929	3	19799	39.96161422294056	43.753416330279855	46.31410256410256	4.0582725040247265	21.054252238193847	30.73842566666667	28.386527	13.40333776635413
CL0931	930	4	19798	56.52591170825335	57.39094658336258	58.01949573878908	1.985270516409608	4.290990332609353	4.3976560000000005	4.3330555	0.2878473690960195
CL0932	931	4	19794	44.26088713751642	43.51988963738264	44.42406581207322	2.598345732245696	4.514405600282914	4.75469925	4.036886	1.9784294293100748
CL0933	932	5	19784	52.234128588758594	51.49275454817708	51.13016367887763	1.4579103629989822	3.866625985847149	3.679764	3.446222	0.5850753701310627
CL0934	933	8	19775	47.524652338811634	51.56376497611834	51.13295516025671	7.388853243916966	31.98923497689001	28.737961125	17.3372345	33.774210444421676
CL0935	934	5	19771	44.16569723332153	46.692328359889615	48.41347726529278	3.755588507549808	179.9608588818977	253.984058	301.400834	108.20665420806036
CL0936	935	5	19763	48.869098821029205	48.984340101853675	49.51909865347623	1.4784035419206998	12.674693692354401	17.104837399999997	16.557078	7.165578228032309
CL0937	936	5	19745	48.179285895163325	48.73826609179026	48.38520258367586	3.0021934474050256	16.145711042238542	17.475627600000006	18.305354	3.756440751640553
CL0938	937	7	19722	47.99209005171889	47.93000973221557	48.544839255499156	2.5105917050786317	3.3327169476219445	3.409479285714286	3.444547	0.3778656893779339
CL0939	938	1	19710	39.553526128868604	39.553526128868604	39.553526128868604	0.0	63.856074	63.856074	63.856074	0.0
CL0940	939	5	19670	50.559227249618715	49.33960830735499	48.37504669406053	4.703385522000131	2.9971775325876973	2.8934040000000003	2.918876	0.4584467404717804
CL0941	940	8	19632	56.15831295843521	56.96324861489693	56.56531299388442	2.3862819323822926	3.8481664438162184	3.650012125	3.2402795	1.2950445934399746
CL0942	941	4	19625	50.56815286624204	50.079571585419046	50.1367582849591	1.8879629748444233	5.522076404229299	5.626021499999999	5.2734615	1.4701538419469065
CL0943	942	4	19604	44.91430320342787	48.23479368126628	47.83093742206432	5.421238740362854	342.19502573944095	745.8741319999998	651.7662475	598.9875409907328
CL0944	943	8	19593	62.00683917725718	62.50740810009864	62.381477283900786	3.804004084875952	3.850239091614352	3.710531375	3.7709495000000004	0.7592384425946072
CL0945	944	3	19559	44.69553658162483	44.34009475495583	44.078361531611755	0.8307336538324099	4.476348635155172	4.037713666666666	3.753542	0.8842505718231434
CL0946	945	3	19540	60.496417604913	56.35567947931697	53.55054302422724	4.4819548273603775	92.22597042200614	453.4615433333333	26.696768	605.2477339368552
CL0947	946	6	19529	56.3469711710789	54.89050400986002	56.347060491380326	3.416287754872364	3.5364798155051465	3.9123311666666662	3.5827269999999998	0.9516836382332132
CL0948	947	2	19495	45.38086688894588	45.1323209795872	45.1323209795872	0.5778655340426441	15.265582102590411	14.840394	14.840394	0.988556
CL0949	948	6	19484	54.63970437281872	54.437988017147475	56.5069473704934	5.157010570064439	3.2990099391295424	3.256585	3.056742	0.7454935571599529
CL0950	949	2	19450	40.961439588688954	41.55150635664464	41.55150635664464	0.9739306378766271	6.342233272236504	6.4051565	6.4051565	0.10385749999999973
CL0951	950	2	19425	50.72844272844273	50.74720710234729	50.74720710234729	0.11970376456357455	3.4363874756756765	3.424795	3.424795	0.07395200000000003
CL0952	951	2	19392	49.57714521452146	48.31479292115243	48.31479292115243	1.4611158931008743	18.286529128919145	18.896514000000003	18.896514000000003	0.7060300000000002
CL0953	952	6	19378	56.05841676127567	55.06365065938284	55.15228796269309	2.4229840537371103	3.1721570422644234	2.961919	2.8548525000000002	0.639364747972548
CL0954	953	6	19371	47.53497496257292	47.653882577059434	46.63279508773285	3.1154010071452376	3.0487110710856435	3.1737314999999997	2.8403424999999998	0.6357718119123008
CL0955	954	7	19370	40.77955601445535	40.603103493537056	42.28824273072061	6.207724976763223	165.87385185859574	190.54920785714282	135.684815	249.845109197008
CL0956	955	2	19362	43.52339634335296	41.790066573792245	41.790066573792245	2.368101255873171	3.707610451967773	3.3586965	3.3586965	0.4766915000000001
CL0957	956	4	19361	60.776819379164294	61.20685407371053	61.093559246231756	1.5277407846499578	3.4266750592944573	3.507610000000001	3.556464	0.2491383097688913
CL0958	957	3	19352	49.33856965688301	49.31994693284995	48.72334584057838	1.4340943306512726	3.8988889077097975	3.9142076666666665	3.8883669999999997	0.042700307019453015
CL0959	958	3	19330	49.229177444386956	51.63447496136	53.045013239188	2.040625016238697	8.724499930315574	12.954042666666664	13.448529	3.9694293933033022
CL0960	959	3	19275	52.33203631647211	52.06697546663039	53.780636189814004	4.242159675983727	3.9257531588067436	3.840959	4.006942	0.3175555036283684
CL0961	960	6	19260	37.21183800623053	36.3896757769397	36.82482392901528	2.9753701978496534	41.34074753779855	38.84097583333333	41.0489535	16.823238385670454
CL0962	961	6	19228	49.287497399625536	49.825011360013455	49.669541219045676	3.22075232240704	19.438065413251508	21.090482	20.7118845	5.693262982177443
CL0963	962	3	19196	50.05209418628881	50.48700246244415	50.07766387076732	0.9000361578469473	3.9429234295686593	4.073006666666667	4.076178	0.20877797176479665
CL0964	963	7	19155	58.245888801879396	57.65359550617495	56.503422854133746	2.4075902703070144	9.38601580302793	8.269631857142857	4.822519000000001	5.284234528120185
CL0965	964	3	19149	50.67105331871116	50.49240096222325	50.518602029312284	0.5076179480873667	3.8658896715755393	3.9230403333333332	3.832785	0.13209581900356346
CL0966	965	3	19148	43.200334238562775	44.942341389420484	45.69727237802535	3.5640685583730733	63.68142166372468	69.84626899999999	62.881438	15.164325150073134
CL0967	966	6	19081	60.54190031968975	60.13464971354969	59.74582457369773	2.854279194570504	4.398013096797862	4.506805166666666	4.459309999999999	0.7737071305370047
CL0968	967	5	19069	36.67732969741465	35.369549080209296	34.793187347931884	2.817458089263357	116.3959053726467	97.1623582	98.09470999999999	41.44689771975744
CL0969	968	4	19065	38.19564647259376	38.334301745561035	38.55796404634073	1.8296923586092595	46.311816173144514	46.5113745	43.247896000000004	9.654386834107449
CL0970	969	4	19055	47.362896877459974	47.19746952757658	46.96215890245741	0.5878506061052732	4.352245158173708	4.00014075	3.8123875	1.0763073936330585
CL0971	970	5	18982	49.00431988199347	49.87937013783078	48.405909797822716	3.2168033872679436	13.670153938784113	16.838897199999998	17.712039	6.6412641309317735
CL0972	971	4	18957	47.138260273249976	46.16042830565321	47.15229504925175	4.3528391341104165	5.101265783193544	5.22415125	5.259848000000001	1.0552685017632657
CL0973	972	4	18951	48.83647300933988	49.01216923485156	48.94450924377968	0.5427072522495442	18.431503037623347	17.51810025	17.057657	5.8399027118179525
CL0974	973	6	18950	47.2928759894459	47.21740920341818	48.179774388773545	3.7616965012795474	19.883328175092352	33.899085166666666	21.6040065	30.911391840663537
CL0975	974	4	18930	49.78869519281564	49.96996842599749	49.77369115840595	2.977096684125437	17.008264310829368	13.546893	15.021888999999998	5.689795212696235
CL0976	975	2	18912	48.71510152284264	48.72081918076572	48.72081918076572	0.19518474123012908	6.904852157466159	6.889853	6.889853	0.5120289999999996
CL0977	976	4	18908	45.74783160566957	45.73352000279329	45.64667099693091	1.28587592471429	5.297034768457796	5.1366095000000005	5.089019	0.9588749385505128
CL0978	977	5	18902	41.085599407470106	42.29955444478596	41.27946127946128	3.2972938850964897	71.24543080213735	77.70865440000001	18.748731	122.90100548168114
CL0979	978	3	18888	41.81490893689115	41.733079795440176	42.24924012158055	0.961721202105473	3.186146034201609	3.141644666666666	3.1821	0.23674843993901126
CL0980	979	4	18877	43.94766117497484	43.08717202715778	43.724795112266456	3.436213594315076	162.56420401176038	148.47328475	163.08602100000004	44.179998329646594
CL0981	980	3	18869	41.189252212623884	41.31137862222758	41.287076271186436	0.2494073168471885	63.56994080841593	57.14871866666667	57.151247999999995	13.3483311737996
CL0982	981	6	18866	48.27732428707729	48.467270986761406	48.481885249201525	1.8561876077415944	17.755161764974023	16.994218	19.988964499999998	7.454396966961893
CL0983	982	9	18812	56.67127365511375	57.24263021265626	56.511175898931	2.3837140461174577	4.2254051011588345	4.346668111111111	4.411223000000001	0.5612837627671932
CL0984	983	3	18801	45.51885538003298	46.14274395325342	46.16935483870968	0.8679197988761279	86.38393268964417	81.182102	86.35679499999999	9.366625825989097
CL0985	984	7	18792	55.34269902085994	54.42520013653867	55.19215044971382	6.492191834082012	4.154137571679439	4.055162285714286	4.451601999999999	0.8875128524208559
CL0986	985	6	18786	46.75290109656127	46.203060997389834	47.018461312962884	4.5656218702857245	8.668614453742148	6.933322499999999	5.205695499999999	4.360811048827642
CL0987	986	5	18768	53.239556692242104	52.944189673256645	53.39609952925353	1.8868194048407625	4.046073847293265	3.740059	3.9954389999999997	0.8114128607452558
CL0988	987	3	18766	46.94660556325269	46.07382084475332	45.759087669280106	0.9289197915053896	4.14879002813599	4.197780666666667	4.195396	0.4831133551906378
CL0989	988	4	18737	37.903613171799115	37.988514229002064	40.63410950664952	5.07662022387946	40.498940272028605	41.3223185	49.6967675	21.389085906873213
CL0990	989	3	18736	48.201323654995726	47.646376273329636	48.134187712024115	0.8487359114649428	4.00448792880017	3.743636	3.910108	0.3639241052783762
CL0991	990	7	18723	53.89093628157881	55.023346314223815	56.0960591133005	7.333302095953617	8.470939200929338	11.178920714285713	3.665336	15.196468575373787
CL0992	991	3	18709	41.92634560906516	41.92776849648754	43.892794376098415	4.379374413739288	50.14636797193864	47.264484	51.001791	15.907701275729087
CL0993	992	4	18707	46.650986261827114	46.762951545408676	46.86065744135875	1.0227236370681796	3.4187140076976537	3.38066475	3.190814	0.3878499593582388
CL0994	993	5	18685	52.22906074391223	52.029769173619	52.45753114382786	2.3350521419563757	4.182317924163767	4.087262600000002	4.3183940000000005	0.5347285696757188
CL0995	994	5	18660	48.7352625937835	48.88660293798158	53.1461761858664	10.90749811742888	310.5666992770097	177.2446218	44.752613000000004	194.11113401652275
CL0996	995	2	18654	41.87841749758765	37.721285474318954	37.721285474318954	9.236200662464787	382.0394934645652	264.669762	264.669762	260.768815
CL0997	996	2	18633	43.04728170450277	43.324420038764345	43.324420038764345	0.7209156194745354	7.777293732302903	7.502533500000001	7.502533500000001	0.7147295000000002
CL0998	997	3	18630	53.34406870638754	55.228489257540616	53.572007127814686	3.1965262270476633	3.799040656146001	3.918720333333333	3.8528050000000005	0.3028024278550104
CL0999	998	7	18618	57.53034697604468	57.42982039734685	57.89613142554318	2.296550243985537	3.695759464926416	3.8235361428571433	3.8308489999999997	0.9121254913009392
CL1000	999	4	18600	50.41397849462365	50.134101755229885	50.60229665428741	2.1926442000453714	3.522394202580645	3.3792394999999997	3.2907339999999996	0.5751985640809181
CL1001	1000	3	18593	41.01543591674286	41.07913876796629	41.13756613756614	0.39656803153284303	3.690652170978325	4.001624333333333	3.617671	0.6784842613735084
CL1002	1001	4	18577	64.34300479087044	64.29509579594003	64.451492962448	0.4442104618174481	72.30265529019756	77.67797949999998	71.743404	13.231383918666742
CL1003	1002	4	18566	37.18625444360659	38.93604353690448	37.54687772895125	3.565895466442316	46.41517077469568	90.05350575	115.3433155	48.812983770789174
CL1004	1003	6	18558	57.23138269210044	56.74310150479375	57.513172355056135	1.3687759141055449	3.3994360181053995	3.247905333333333	3.0806965	0.5963593815459675
CL1005	1004	4	18551	54.757155948466384	54.9083585863484	54.963269348609856	1.3702198038184614	16.574474261657052	13.34048375	12.097736	4.117628223012392
CL1006	1005	4	18533	33.4538390978255	36.13495724718538	31.18705695267833	9.228117781437335	68.3914670829871	123.34452125	5.710668	204.78876728217134
CL1007	1006	5	18531	60.95191840699368	61.4583516189674	60.92896174863388	1.4087727931517404	4.7295403878905615	4.5610328	4.441197	0.4091964965120793
CL1008	1007	3	18501	57.32122587968218	57.78490779484	57.962598425196845	1.996708346397061	49.07751910761579	62.454512333333334	42.259135	29.793043012841622
CL1009	1008	2	18497	42.11493755744175	41.91580913559838	41.91580913559838	0.5359054879727729	41.49777677066551	31.396516	31.396516	27.185075
CL1010	1009	7	18479	44.55868824070565	47.405184853205874	50.682162708438604	8.465132442173186	92.33459858915523	92.60432528571428	4.692913	129.48392189978136
CL1011	1010	5	18472	52.26829796448679	51.703784384651726	51.66666666666666	1.688449585851313	3.187978242529234	3.1092912	3.276217	0.29396930880103805
CL1012	1011	4	18465	31.405361494719738	33.63068454758057	34.54117768059812	3.9285419293843606	44.37704260709451	65.25446575	44.7350555	63.92434334076165
CL1013	1012	3	18426	43.384348203625315	44.739342411952656	45.78612876485217	2.6204128363290886	64.67787275393465	75.98077799999999	89.517934	20.98755395021746
CL1014	1013	2	18409	42.46292574284318	42.251976912544144	42.251976912544144	0.2439447840300879	3.5641599169971205	2.8493835	2.8493835	0.8265795
CL1015	1014	2	18399	59.0358171639763	58.91920202853358	58.91920202853358	0.3756963538803575	4.654947658894505	4.6014870000000005	4.6014870000000005	0.17223299999999986
CL1016	1015	6	18396	45.70015220700152	45.84167497351858	45.66052054878521	1.16791335246379	3.9983232607088497	3.929380833333333	4.1577405	0.6024284476957732
CL1017	1016	5	18365	54.51129866594065	56.892034077565185	55.912508544087494	5.007391078469039	3.3636243729376525	3.1506877999999996	2.53125	0.8418947445174841
CL1018	1017	4	18345	54.00381575361135	53.61651951064332	54.01648701849883	1.4569179497998035	337.3106840625238	369.87908275	325.449685	123.23451801912904
CL1019	1018	3	18336	54.144851657940656	53.26468184106425	54.129647910496864	2.180243905772441	23.749729984402265	21.360932	24.65084	7.753965986239085
CL1020	1019	4	18333	53.662793868979435	53.77559085106947	54.94691623109189	3.358626639469025	4.349621994108983	4.6500960000000005	3.994684	1.5696440237819846
CL1021	1020	2	18321	31.231919655040663	30.979983810783377	30.979983810783377	0.6630824023326731	4.813087728017028	4.693244999999999	4.693244999999999	0.31542000000000003
CL1022	1021	4	18295	51.29816889860618	50.542590454293325	50.6233607456802	2.1594236792691057	7.535054705001366	9.245191499999999	5.9961965	6.359429582975996
CL1023	1022	4	18295	56.90079256627494	56.588156421962395	56.98540432931718	2.4339829872411487	14.519135014430173	16.039234	15.8381785	10.517544878921386
CL1024	1023	8	18286	62.27715191950126	62.28209368874478	62.0310003585265	2.016503170082591	4.072596382861206	3.84323125	3.6480195	0.8353179564258375
CL1025	1024	5	18282	60.622470189257186	59.63671175384823	62.10169491525424	4.0506941377383	3.3298323453670275	3.278662	3.1261229999999998	0.6100476782586752
CL1026	1025	5	18277	53.36214914920392	53.142761091146596	53.4438775510204	2.821999880985376	3.7804024905619085	3.7325212	3.4344230000000002	0.6422471776026424
CL1027	1026	2	18265	43.77224199288256	41.080577355663856	41.080577355663856	4.161792482756244	608.9726060578703	380.283983	380.283983	353.593304
CL1028	1027	5	18252	53.40784571553802	54.160053841043045	54.59395376407824	2.484061567691109	3.5517127222222213	3.4946390000000003	3.308118	0.4324635844785084
CL1029	1028	2	18243	47.09203530121143	47.54224999100461	47.54224999100461	0.6010440238490347	5.662184872224962	5.3789805	5.3789805	0.3780824999999997
CL1030	1029	5	18241	56.01118359739049	56.19404404196696	56.0564538229652	2.4175615038824203	3.7941524840743375	3.6824252	4.03717	0.7251897091132499
CL1031	1030	6	18236	46.775608686115376	46.66410156438141	46.41858551613551	1.5732536268947612	3.8566212557030055	3.845219	3.8002905	0.6464990905159883
CL1032	1031	4	18234	41.11549851924976	40.790577965070206	40.65878181814335	1.0017337052581092	101.32865647033016	152.8677145	118.09421699999999	131.93206575544443
CL1033	1032	3	18234	44.59800372929692	45.5752535431494	46.087990487514865	1.1827184634696086	4.914278789349567	4.639088	4.757396	0.5574569862443799
CL1034	1033	5	18231	42.34545554275685	41.73716013791704	37.74590163934426	5.790810804990022	272.9724873421644	246.8866136	226.12148900000003	234.8311913120571
CL1035	1034	5	18221	46.27627462817628	46.168657764648806	45.77259475218659	2.0299464169650063	420.3426490945063	504.043958	557.756279	281.3789916088614
CL1036	1035	3	18156	55.56840713813615	55.81054680487213	55.17373530914665	1.3022760829164195	3.5097395600352503	3.5017976666666666	3.483932	0.046344314605162015
CL1037	1036	4	18131	48.331586785064246	48.97474051695935	49.858055714386026	1.667731429625791	17.42148628040373	15.22937425	16.569126999999998	5.9316501899945315
CL1038	1037	5	18112	48.44302120141343	47.55728731719404	48.700236320668964	2.184319454720225	3.9819996365945234	3.8950044000000004	3.8979779999999997	0.6019334583797781
CL1039	1038	3	18107	46.23073949301375	46.41608447504607	46.31432545201669	0.4570277368245508	4.411759395703318	4.6924703333333335	4.869281	0.4475283306565321
CL1040	1039	2	18091	38.58272068984578	38.36991990230143	38.36991990230143	2.8162246140928597	37.90835534127467	36.1480115	36.1480115	23.2965475
CL1041	1040	2	18084	43.662906436629065	43.64463031563125	43.64463031563125	0.8262634303111867	5.544685995023227	5.5336135	5.5336135	0.5005875
CL1042	1041	2	18080	45.74115044247787	46.6459305316557	46.6459305316557	1.1061958352944892	68.45310787278763	61.231047	61.231047	8.829785000000003
CL1043	1042	3	18057	58.437171180151736	54.974546337994546	54.91620111731844	3.99399131043476	23.294631141108713	16.328739333333335	14.314718	7.4033902483464225
CL1044	1043	4	18051	42.828652152235335	43.63653167053248	44.23571135357575	3.638402469379361	118.18336228303144	129.1429195	122.376175	41.98759682784822
CL1045	1044	2	18048	26.81183510638298	24.76223858506488	24.76223858506488	2.3438802443764435	4.7487419651484934	3.6827115	3.6827115	1.2190925
CL1046	1045	9	18040	56.55210643015521	56.81648076112281	58.6145648312611	5.783065932479646	8.087125639578714	6.0814988888888895	4.25	4.542799392355934
CL1047	1046	3	18037	49.25431058379996	48.55747911573404	49.69122504667529	2.124983945766384	5.155275806231635	5.036705	5.229931	0.3692430021435749
CL1048	1047	5	18028	54.143554470823155	54.24366309297807	54.2703944848717	1.9266220686758055	3.6170667184379854	3.7425532000000006	4.000942	0.6006591572508987
CL1049	1048	6	18015	51.33499861226756	51.34890168663288	50.95352068856944	2.8620065543610353	5.896266605661949	6.257489333333332	5.842295	1.4901177322848984
CL1050	1049	4	18010	42.465297057190455	42.95389021766146	44.16986804879937	3.628415006662524	7.435509293892283	7.194762000000001	6.4430375	2.5372882257710687
CL1051	1050	4	18006	50.138842608019544	49.62360491255363	50.07759734608502	1.6185797638294537	25.32728722375875	27.123501999999995	24.9127535	4.208826931877871
CL1052	1051	4	17999	51.35285293627424	51.29875783694344	53.46266093747549	5.244827411060536	1274.188732289905	505.356513	58.8166725	789.4200508852208
CL1053	1052	3	17996	37.841742609468774	41.86310028908277	41.31326949384405	4.6955358596414145	50.29584708368525	75.62329566666666	56.120075	37.75546502957106
CL1054	1053	5	17993	51.29772689379203	51.718801910681954	51.55137027646988	1.8917113766633962	86.31031451436671	45.56225780000001	17.808545000000002	62.1716950820749
CL1055	1054	4	17980	50.400444938820904	50.24757188063302	50.24701204466229	1.3406313646158674	23.32208045317019	22.459038250000006	23.783484	4.010709936493625
CL1056	1055	2	17954	55.11863651553971	54.307668777926	54.307668777926	2.4778956366774447	33.38456596351788	32.209003499999994	32.209003499999994	3.5919075
CL1057	1056	6	17949	61.396178060059064	60.53075836270318	61.95027628879625	4.835727002050364	3.6101988546437127	3.2389558333333337	2.97109	0.826352019395168
CL1058	1057	4	17877	58.60603009453488	57.63098085490712	58.6078470663256	2.824270652968855	3.7089021343625888	3.51657075	3.618783	0.5839294175957294
CL1059	1058	6	17853	62.062398476446546	61.75021781741157	62.7858054144567	2.2411205006147195	3.6945718230549485	3.650793333333333	3.546508	0.4611830758186554
CL1060	1059	4	17842	47.59556103575832	46.979310318220435	47.63827693742272	3.5518213148819955	5.702290527575385	6.4929125	3.6779095	5.298568826771174
CL1061	1060	5	17751	47.16917356768633	47.14641297203372	47.01348747591522	1.026959875681553	32.30551364525943	34.495643	3.147307	63.01188936763545
CL1062	1061	4	17743	53.45770162881136	52.58042229074986	52.13268693213447	2.016039922530372	3.0664477422645553	2.8974495	2.7388375	0.5328688051145891
CL1063	1062	5	17742	48.049825273362636	47.46338975630734	48.217665615141954	1.951854767332743	38.72848592159846	48.6255634	30.215017	44.031484300051034
CL1064	1063	6	17720	56.93002257336343	57.15344407164825	56.887730672275254	1.3004252337148503	3.2641660917042885	3.0956803333333336	3.073522	0.36350854172021263
CL1065	1064	6	17717	57.6451995258791	58.110656927140674	57.60839059310665	2.6298884919388112	3.3968990397922902	3.6061713333333336	3.2357825	0.9958504440821201
CL1066	1065	5	17710	53.952569169960476	54.017727935648225	53.89125799573561	1.5090003459385284	15.811697104009033	16.3546172	13.616529000000002	7.274545794624772
CL1067	1066	4	17702	46.28855496554062	47.2854589359864	48.743372057642524	2.9241048319471057	25.33626369918653	22.97763325	23.605566	4.411551724171801
CL1068	1067	6	17662	48.54489865247424	46.66572096222552	48.037834275870686	4.627474334158978	5.902359782810553	6.536828833333334	4.048196	6.171568269439365
CL1069	1068	6	17660	52.38391845979615	56.94432213338679	59.02251028340692	6.487898953003818	50.828969103907134	26.03714583333333	3.806964	32.067439219154025
CL1070	1069	4	17657	45.78920541428329	50.58954130989575	53.18728666176979	8.752799534677253	21.584869168431787	12.1148715	4.1829385000000014	14.922562109138573
CL1071	1070	4	17653	43.833909250552324	43.34716615222392	43.825534470121774	1.6050302824748517	7.516056739874242	8.5284575	4.9273265	6.601359205982147
CL1072	1071	3	17636	55.58516670446814	56.06286640190272	54.81589348866237	2.6490494817939982	16.90605500464958	16.68405733333333	18.20402	8.065260664785912
CL1073	1072	4	17614	55.06983081639605	54.81976946675642	55.0107213870768	1.6278705212840892	25.763161522652435	25.402995250000004	25.651016000000002	3.2518479635048574
CL1074	1073	5	17605	44.65776767963647	47.23499815991514	46.68733049205734	7.814560895977572	31.64993582476569	39.829905200000006	6.308084	67.42111332202231
CL1075	1074	3	17573	45.3650486541854	46.44556229825685	46.36202307009761	1.2129676837994017	11.050407802310364	16.556366666666666	16.346373999999997	6.711446771938438
CL1076	1075	4	17570	42.70347182697781	44.2516770417735	41.128738415042385	5.672631498106706	25.765161760671603	49.8602115	3.084563	81.19837790741992
CL1077	1076	5	17559	61.42718833646563	61.93752447877782	61.986803519061574	2.2414936491136688	3.9792066437724247	3.842265	3.938587	0.4878485635436473
CL1078	1077	3	17485	62.402058907635116	62.390332302879365	63.01343005587688	1.1847402933701472	4.151387716099514	4.109335333333333	4.160748	0.16596155317087413
CL1079	1078	3	17474	48.8897791003777	49.85007027249211	49.721706864564005	2.25247906729106	3.3966753125214613	3.5327963333333336	3.383744	0.2647669878847353
CL1080	1079	4	17455	47.96333428816958	47.31831600161858	47.61235408232668	2.4848743580327675	15.357298038498998	15.0149295	16.488506	7.462793359243893
CL1081	1080	4	17454	43.21645468087544	43.01012581563612	42.749198825335704	1.409443489151721	3.3667155288759023	3.3510574999999996	3.249739	0.19427660708446104
CL1082	1081	4	17453	55.69816077465192	55.5106626020327	55.230579379311344	1.833287895947036	4.071978926316392	4.0624715	4.0383295	0.37210455363277933
CL1083	1082	2	17436	57.622161046111486	59.38871328260571	59.38871328260571	2.1059486391024858	292.2074509160358	160.492716	160.492716	157.020246
CL1084	1083	4	17434	54.10118159917402	52.80893415415243	54.419872618175795	7.230187054245228	3.9547323336010094	3.89674375	4.0056065	0.5044645226650605
CL1085	1084	2	17425	37.08464849354376	38.20046878176266	38.20046878176266	1.7352225365653169	38.67479002094692	74.485399	74.485399	55.689412
CL1086	1085	5	17422	52.582941108942705	52.91412838193752	53.27088212334114	3.1386275073858623	3.3843032404431184	3.3879714	3.4920379999999995	0.3138608815966717
CL1087	1086	3	17396	42.76270406990113	41.797009599259376	41.505441354292614	1.2777628912798502	35.72056989779259	33.94006333333333	33.842383	2.8154519270620764
CL1088	1087	3	17395	48.65766024719746	48.352717120610855	48.17770683692471	0.7957089474654376	3.9955735444093134	3.9016349999999997	4.007009	0.2848951324587113
CL1089	1088	6	17391	51.30814789258812	50.79101566944032	51.169276638935706	3.5388508469708455	3.585872935541372	3.4587845	3.1554225	0.9440201367299236
CL1090	1089	7	17361	50.65376418409079	49.70541554665699	50.24154589371982	1.8353039505252189	5.3138267732273485	4.935245857142856	4.594456	1.0824560803501355
CL1091	1090	5	17361	54.351707850930254	53.06214161717514	55.02910518478408	5.257112000713849	105.7836277137838	101.113301	103.219083	59.18080415700821
CL1092	1091	4	17354	58.2862740578541	57.12111270746815	57.30677545263389	3.072140568375036	4.54805299262418	5.048829250000002	4.2140295000000005	1.5728561825134195
CL1093	1092	5	17351	49.37467581119244	50.52229893329186	50.09377930603314	5.435355756854573	20.600572648665786	20.152571	20.941563000000002	6.680901994759182
CL1094	1093	4	17320	47.90415704387991	46.24124520593958	46.114428417105465	2.6279072161153483	4.98490290635104	4.23572475	3.543372	1.3099646463304602
CL1095	1094	5	17294	49.814964727651216	50.622782351473276	49.819668189468615	1.7868759777908985	5.109554564415404	5.1758692	5.662518	0.931120524107465
CL1096	1095	3	17294	49.358158899040134	48.33221766093336	48.63210254448058	2.841084904674172	13.016346303573494	19.025615	4.272303	21.310830677309102
CL1097	1096	4	17293	54.443994679928295	54.6158428320535	54.24775062925874	0.9264838105029238	3.539000147689817	3.696452	3.7517245000000004	0.3156470233338183
CL1098	1097	2	17283	55.55169820054389	56.29639938703022	56.29639938703022	1.5294914564519644	3.816360052421455	3.779897	3.779897	0.07488899999999997
CL1099	1098	4	17279	52.43358990682332	52.30962861222726	52.061162352167216	2.3186507291271297	3.891676948376642	3.837248	3.6926985	0.30477894747094986
CL1100	1099	4	17258	57.99629157492178	57.138191459886386	58.19165208045015	1.978918746839215	3.8704840577703097	3.6098965	3.7710265	0.4750799643757353
CL1101	1100	3	17255	41.87192118226601	51.242420772810135	61.66044776119403	14.829724319869635	15.196110077832513	10.370896	5.233193	7.807800789953895
CL1102	1101	2	17250	42.72463768115942	42.587812943227306	42.587812943227306	1.6390463398117523	3.3629047782608694	3.3287365	3.3287365	0.4093074999999999
CL1103	1102	2	17246	41.05299779659051	40.6329629088129	40.6329629088129	1.7321668279800768	18.686529367157604	22.3351465	22.3351465	15.046401500000002
CL1104	1103	10	17240	60.33642691415314	60.8420298291419	61.40371931930036	3.5741650435687715	2.3578126774361947	2.3175243	2.3013760000000003	0.4460219245369111
CL1105	1104	7	17227	61.18883148545887	62.33595327975432	63.45311130587204	5.186955637296101	4.887069335519824	4.3712931428571435	4.090343	0.8108706151188767
CL1106	1105	4	17201	53.863147491424925	54.3909211911102	54.67941073499272	2.444489029902504	3.4852125452589964	3.31205125	3.227059	0.28733672364612123
CL1107	1106	2	17191	46.413821185504034	46.06811103534739	46.06811103534739	0.4666747696382387	4.309353374091094	4.3778165	4.3778165	0.09241849999999996
CL1108	1107	2	17113	46.63705954537486	46.58418369035079	46.58418369035079	0.4567715835572415	4.470945282416876	4.436766	4.436766	0.2952600000000003
CL1109	1108	6	17104	52.46725912067353	52.297926166499174	51.32363628590971	1.8333823435069936	3.3941938747661364	3.375106666666667	3.45996	0.3803998159961291
CL1110	1109	7	17073	63.04105898201839	63.11262525922921	63.29036218538982	1.42165494179617	4.142475009195806	4.106498714285714	4.261376	0.9313832193791454
CL1111	1110	5	16993	56.53504384158183	55.778912372632426	55.79091219678852	1.8455990546251428	3.546290005884776	3.3773876000000005	3.5652480000000004	0.4620861780709741
CL1112	1111	2	16979	42.576123446610524	42.079511263038036	42.079511263038036	0.8346014317407793	8.118463112433004	8.0114135	8.0114135	0.17990649999999953
CL1113	1112	4	16946	49.15614304260593	48.0758017542274	48.320637477280464	1.4268410511308864	4.782015286557299	3.96735175	3.911869	0.9287677162472796
CL1114	1113	3	16939	63.516146171556755	64.00094880108941	64.87995533221664	1.8441065931430185	3.536086527776138	3.4905373333333336	3.335258	0.2563077690607308
CL1115	1114	5	16917	49.831530413193825	52.42171686254218	53.30739299610895	2.8231616873966323	3.3172627617780925	3.2135642000000004	3.2835919999999996	0.4714189445897989
CL1116	1115	6	16916	60.28020808701822	60.14061402042177	60.83441327040037	2.125291017878803	6.221508436982738	5.319771500000001	4.15691	3.4776154618836053
CL1117	1116	4	16911	45.18952161315121	43.82120374450236	44.768697626411324	3.795109592720226	7.275077821418012	13.24525675	4.3444655	16.124624268198644
CL1118	1117	3	16909	50.351883612277476	49.910199511883384	49.406115744250705	1.6772930150481316	3.645915256727186	3.534333	3.3734349999999997	0.3632731809157765
CL1119	1118	5	16902	60.60229558632114	61.32792181730109	60.64935064935065	4.221311401764121	4.082541035380428	3.1807008	3.124319	1.0189846583348348
CL1120	1119	4	16898	53.1897265948633	52.6506576421181	52.95875509300429	1.9528053536818564	3.8512562446443366	3.81773125	3.7697154999999998	0.12129327512557116
CL1121	1120	3	16858	30.21117570293036	29.82696952891932	30.129107981220656	1.19985599080003	4.563534171669237	4.453899666666667	4.14919	0.7572302885658729
CL1122	1121	2	16838	42.712911272122575	41.36811737187138	41.36811737187138	1.6429864818190223	6.256949198004513	6.438601	6.438601	0.2219310000000001
CL1123	1122	4	16822	50.166448698133394	50.32494964229435	50.24615024615024	0.7396341918081822	4.186011665140887	4.11102275	4.133015	0.4032724275842418
CL1124	1123	3	16804	58.61699595334444	59.35292119914678	58.745476477683965	1.7485148666662809	4.093177870388003	4.124382999999999	4.232843	0.1848044369669372
CL1125	1124	3	16801	53.30635081245164	53.28532288750207	52.64529580401355	1.0914731998972085	3.777641553002797	3.689365	3.75869	0.30276754453871035
CL1126	1125	3	16779	42.40419572084153	41.594894931765815	42.915214866434376	2.509844684348989	82.0154367260862	89.47547633333332	76.055913	21.90545573392981
CL1127	1126	6	16770	49.689922480620154	50.09674851857688	50.22267472603003	1.9704228529947072	8.8517564594514	7.043595166666668	5.318169999999999	4.296296218024134
CL1128	1127	3	16757	39.84006683773946	40.44595363946369	39.93071957172099	1.2335917590927985	142.44756882025425	150.365621	142.258347	16.252324322732168
CL1129	1128	4	16740	53.0884109916368	54.67724783382594	54.428758047874915	2.4896812351162874	120.53194282550777	125.084921	121.8297725	33.736306171459674
CL1130	1129	3	16738	27.84681562910742	27.80205640939144	27.57172848145556	0.7987074325747904	5.778974046301829	5.620047333333333	5.683527	0.3128875019900215
CL1131	1130	6	16737	50.61839039254347	50.28406348897929	50.68994774665266	1.7794071960112938	4.865602740993008	4.886869833333333	3.5410845	2.4537801844933336
CL1132	1131	5	16737	45.6413933201888	45.10777636633152	45.460399227302	0.8750181427474456	4.473908737945869	4.1928326	3.9348690000000004	0.5878188931753044
CL1133	1132	3	16708	60.85108929853962	60.7757525723515	60.514457378895976	0.3708575418566216	3.4619125539861137	3.4461	3.397531	0.07629195449499684
CL1134	1133	7	16699	48.70351518054974	48.37792287840619	48.53539462978031	2.168649948873969	3.3225937866339312	3.2716478571428573	3.13761	0.4185596449923504
CL1135	1134	4	16695	53.06379155435759	52.78543264012368	52.7491894996301	1.4386924306079127	3.5881558537885594	3.414998	3.4976445	0.3685584983425291
CL1136	1135	6	16665	49.180918091809176	49.39279705457813	49.432502582224224	1.2596610884299428	11.771836162916292	13.116525166666667	12.05689	7.272837828654173
CL1137	1136	3	16665	57.17971797179718	56.56080251566635	56.55813953488372	1.2626807268954794	3.7177326777077706	3.4044446666666666	3.7329839999999996	0.6399534608752594
CL1138	1137	2	16661	49.76291939259348	47.696627012457114	47.696627012457114	4.141284415427887	3.8580514644979296	3.5737300000000003	3.5737300000000003	0.5698400000000001
CL1139	1138	4	16651	46.375593057474035	46.184247448503655	46.07561823293536	1.4982578856540645	3.993452806798391	3.97942775	4.0971069999999985	0.5659442867175066
CL1140	1139	4	16641	59.58175590409229	60.02220388932561	60.56616718470403	1.9523453052928268	4.0101761042605615	4.0546755	4.086838500000002	0.4757694291316436
CL1141	1140	4	16638	55.51749008294266	55.58469440717195	55.607757696229115	1.0340824013127337	3.07159195924991	3.1030687500000003	3.1740855000000003	0.3344472556356046
CL1142	1141	6	16637	62.811805012923	63.25608516746066	63.45944642923367	2.7587038369702057	3.5081043146600948	3.544623666666667	3.5604214999999995	0.41015495430209736
CL1143	1142	7	16626	61.367737278960654	61.185115556831825	60.33057851239669	2.508457954693081	2.3800352682545416	2.368775142857143	2.429688	0.3040202441466351
CL1144	1143	2	16600	43.76506024096385	44.10548004927611	44.10548004927611	2.0639038780071073	17.16785541445783	19.445911	19.445911	13.81144
CL1145	1144	6	16591	61.6539087457055	62.101958695216425	62.49670473436224	2.256702174356568	2.988235454885179	2.9721688333333334	2.9569959999999997	0.4479235453602979
CL1146	1145	4	16591	56.07859682960641	56.340361785078876	56.08619699856655	0.9526455973774772	16.662653784039538	16.315919750000006	15.9161085	3.634148694516529
CL1147	1146	6	16588	50.34362189534603	48.82046073629633	51.76769945281437	8.159120375522393	7.095926822884014	7.905016833333334	6.4669605	2.6202865898501404
CL1148	1147	4	16584	52.35769416304871	52.57675226245028	53.07244142380834	1.455291170648077	6.41963881114327	5.755274	4.0940769999999995	2.9170368909458433
CL1149	1148	5	16583	55.15286739431949	55.03077242813182	56.2817130099452	2.6422018748082663	4.100072912561057	4.0541334	4.090909	0.6794356361347555
CL1150	1149	2	16579	44.405573315640275	44.56622124172188	44.56622124172188	0.19978861049486693	5.359723886784487	5.629983999999999	5.629983999999999	0.3361069999999997
CL1151	1150	2	16574	58.07288524194522	59.76486116629548	59.76486116629548	4.552404053600828	4.905077642029687	5.202968500000001	5.202968500000001	0.8015005000000001
CL1152	1151	4	16524	51.04091019123699	55.15164926935499	54.06456645250498	5.621770294946798	17.43237084846284	7.94466175	3.608893	8.416908786162333
CL1153	1152	2	16512	54.324127906976734	54.292999986178685	54.292999986178685	0.2187166928585356	3.4908730496002907	3.4778474999999998	3.4778474999999998	0.09152250000000016
CL1154	1153	7	16505	62.684035140866406	62.51778734398072	62.52518468770987	1.1824753044463059	3.0155544634959104	3.076645571428571	3.139105	0.41961145535699607
CL1155	1154	2	16495	63.449530160654746	63.34372112295276	63.34372112295276	0.16658586206874304	4.213151274507426	4.2125755	4.2125755	0.0009065000000001432
CL1156	1155	4	16460	54.027946537059535	53.959412833961856	54.193612174248635	1.5644870080804678	3.3928905963547997	3.3236842499999995	3.3153660000000005	0.3640607687848109
CL1157	1156	2	16451	61.303264239255974	62.21103354549384	62.21103354549384	2.100677008991287	4.230147253540818	4.3946985000000005	4.3946985000000005	0.3807895000000001
CL1158	1157	3	16423	40.74164281799915	38.467691445087354	41.47223135064082	4.335368728405517	100.13758629233392	143.59881066666662	84.620832	85.94719921778841
CL1159	1158	4	16416	43.50633528265107	43.736573819714756	43.76055527523414	0.6415679483086068	191.1090893783504	183.82300775	184.215459	36.75530089942149
CL1160	1159	6	16410	53.53443022547227	54.280956266043226	54.70086184091447	1.7103766281906598	3.9437295987202927	3.8021965	3.618753	0.6355265629947473
CL1161	1160	3	16401	51.996829461618184	49.545592286747464	48.70286172773469	3.5766749038503827	4.350145047923906	4.7198540000000015	4.619583	0.7733517573140095
CL1162	1161	8	16380	56.501831501831504	56.515554030552146	57.84350705797614	2.420485425497993	3.618439003235653	3.5922695	3.7563910000000003	0.5127774545767881
CL1163	1162	4	16370	50.03054367745877	47.87855029778204	46.97246985931224	2.8450320697896108	3.5255422370800247	3.1562349999999997	3.1843515	0.6420561455289562
CL1164	1163	6	16359	45.52234244146953	46.36762124561984	45.87425219132912	4.663695613555351	47.612224240173596	45.54747983333333	42.97207350000001	33.21237661346909
CL1165	1164	3	16359	43.162785011308756	47.46732437138832	48.03973744899769	7.496647677337428	57.377619858793324	89.91521666666668	115.784254	60.06739979326784
CL1166	1165	3	16340	54.8531211750306	54.93724125688456	54.9917718047175	2.2165899831064486	4.122866034149327	4.150998	4.075508	0.3681467114398825
CL1167	1166	6	16327	60.3233907025173	60.50559903456335	60.51359199574646	2.8316923154976243	3.296236071966681	3.3624225000000005	3.4550754999999995	0.5911056550030489
CL1168	1167	6	16320	46.85661764705882	46.47784109488078	48.20309826280066	3.7683310374668086	16.681843232781862	17.239555	15.9622475	7.932838877640653
CL1169	1168	3	16318	59.8847898026719	57.70791276358568	60.30711959050721	4.601316674203709	3.6367958649344283	3.4548306666666666	3.65916	0.4698768824201601
CL1170	1169	4	16308	37.73608045131224	36.245939512385114	36.75260904773846	3.3970854963321284	405.6158603249939	401.49774075	11.2516975	680.3000781502839
CL1171	1170	7	16280	47.81941031941032	49.18804469930461	48.99563318777293	2.5240987347533266	3.0604523968058968	2.9652488571428566	3.060886	0.5068689506505117
CL1172	1171	4	16278	49.76041282712864	49.56261634935127	49.912497863500974	0.6845005132159315	8.531191679628947	8.85959125	5.8657305	5.8845965063452885
CL1173	1172	5	16257	49.36950236821062	48.51854587907396	49.4147768836869	2.605835892345734	5.4023599700436735	5.082511200000001	4.445475	1.6078618928871222
CL1174	1173	5	16241	64.28175604950435	63.846901902424214	64.27554796470254	2.9115357118930305	4.3961051968474845	4.285722	4.443976	0.6484111425239389
CL1175	1174	4	16227	50.57620016022678	50.23008975108326	50.74089900508672	1.2967989762481724	4.219754677451163	4.180155	4.316612999999999	0.4255340059431208
CL1176	1175	5	16222	56.52200715078289	56.99887164386304	57.02653007617547	1.960497948006866	3.861996019418074	3.659995	3.861811	0.6251926912371896
CL1177	1176	5	16220	40.26510480887793	40.63214259617062	41.11786148238153	4.792674397775167	126.74552640043156	126.87355900000001	143.493309	39.9408491673635
CL1178	1177	2	16215	44.26148627813753	44.53161779839034	44.53161779839034	2.277786063910245	30.53193191970397	30.854726	30.854726	2.7218439999999986
CL1179	1178	4	16181	63.488041530189726	62.48079035523546	63.79972369835836	2.611863760210256	3.15692677881466	3.230453	3.1792305	0.18932950559672412
CL1180	1179	5	16173	46.88678661967478	46.349090152014426	45.93446601941748	1.0243990878895068	4.345741863599826	4.2448538000000005	4.443279	0.7874638888755219
CL1181	1180	6	16170	62.72108843537414	62.31535303412713	62.08725502229069	1.370638277240931	4.1251760393939385	4.0794966666666665	4.0653760000000005	0.2931175471528254
CL1182	1181	3	16147	51.018765095683406	51.08700997162352	51.179499461142385	0.2281083137368895	14.662926446584507	13.296546	14.778545000000001	2.382081056292725
CL1183	1182	6	16113	63.33395395022653	64.07995875963893	64.59422349480667	3.0550533021109225	2.990963125550798	2.9272853333333337	2.9865155000000003	0.3682575551891487
CL1184	1183	9	16109	63.05171022409833	62.451223024598605	62.14876033057851	3.09465965679523	2.6177978691414743	2.604928777777777	2.534447	0.2627985448478983
CL1185	1184	4	16109	62.511639456204605	62.933693523470275	63.206050285640316	1.2207926583650583	65.57408432044198	64.66361725	65.28611649999999	4.887689388966751
CL1186	1185	3	16094	40.44985708959861	37.78696987755226	34.07871198568873	5.957303412871085	23.97249313421151	29.181977000000003	32.315989	17.901994019024887
CL1187	1186	2	16087	32.84639771243861	33.950250125681585	33.950250125681585	1.828991015742062	15.91097335910984	32.1215575	32.1215575	26.8595805
CL1188	1187	4	16077	53.536107482739325	53.99668406920028	54.149279335626495	1.2098327553284032	34.29229491833053	31.1074905	30.581364	14.247180389919851
CL1189	1188	2	16071	46.41901561819426	46.94968546104184	46.94968546104184	0.7336253801637334	4.372941461265634	4.4060815	4.4060815	0.04581449999999965
CL1190	1189	6	16052	57.19536506354349	59.68262297543571	61.33141159504278	3.8313320591235955	513.0572538772117	483.31705166666666	475.4708195	57.92597672730246
CL1191	1190	5	16049	58.83232600162003	58.400465518592064	59.06674542232722	2.2149933410928417	3.752424528070285	3.6841366	3.728554	0.597944988195603
CL1192	1191	5	16047	58.808500031158474	57.14493373064344	55.440158259149364	2.546852076242632	59.55258572487069	58.6896636	56.093881999999994	3.852365444311978
CL1193	1192	3	16047	54.552252757524776	56.31695039021897	57.16862037871957	1.6108151367131471	83.72994375191625	98.980343	104.86641200000001	14.1486934049858
CL1194	1193	2	16034	48.77759760508918	46.36600077401746	46.36600077401746	2.8203897585269218	24.338693951977053	17.718208999999995	17.718208999999995	7.742731999999998
CL1195	1194	3	16005	54.60793502030615	54.067426177112225	54.52089337175793	1.0015820627297591	4.6928960113089655	4.299476666666667	4.405026	0.7027802521444539
CL1196	1195	5	16004	61.790802299425145	61.75574827104054	61.547388781431344	2.4932461985904006	81.93077272750561	79.8527436	60.212201	42.8600156485568
CL1197	1196	6	16002	59.26759155105612	57.90589733731925	64.67243796230018	13.946439471108036	7.896273889326335	8.8447405	7.122769999999999	6.15570907335385
CL1198	1197	3	15982	50.206482292579146	49.657212355762994	48.5202776762879	1.964754825272624	3.554103395069453	3.5392386666666664	3.52021	0.10638163736389004
CL1199	1198	3	15978	43.71010138941044	42.609290411908134	43.248890049621316	3.1787489338000317	4.472390124295907	4.343466666666667	4.291678	0.3356559566156325
CL1200	1199	5	15974	60.673594591210716	60.83716511022698	59.56175298804781	3.283253092726772	3.1552590962188565	3.0528178	3.306239	0.5092626506923122
CL1201	1200	5	15969	49.79648068132007	50.53057647297046	50.28409090909091	1.6080112114212393	4.530176123113532	3.9094637999999997	3.305986	0.9111306621705584
CL1202	1201	2	15962	41.573737626863796	42.337334173143795	42.337334173143795	0.9867655498478952	30.731811450068914	61.534187	61.534187	39.804689
CL1203	1202	4	15959	53.01084027821292	53.68063770351102	53.99189812497187	1.0694820670702416	3.244795442759571	3.2405522500000004	3.2261415	0.10226773923475327
CL1204	1203	6	15945	47.59485732204453	46.58281352415201	47.48312198473511	3.958697780134752	5.7837148421448745	5.484518999999999	4.182935	3.6320452289496616
CL1205	1204	9	15940	59.07151819322459	59.288665148262346	60.21553659631792	2.5428374860139744	3.658114272710163	3.7273974444444438	3.7524879999999996	0.5497660735858703
CL1206	1205	2	15937	41.12442743301751	40.420179732463396	40.420179732463396	4.624472848673612	7.798943873752901	7.301374000000001	7.301374000000001	3.267314
CL1207	1206	3	15925	47.50392464678179	50.068792945110616	47.72182254196642	3.994093127421581	840.9750959201257	811.4229836666667	850.896147	125.2774863362451
CL1208	1207	3	15917	43.909028083181504	44.47381370063043	44.7374617376972	1.5229456195782758	57.05039319959792	57.574355	56.208926	2.9843158580609392
CL1209	1208	3	15888	49.07477341389728	51.853893506022814	54.911356013416395	4.6633910502848845	27.466831253021144	44.923586	62.402764000000005	29.804220360082827
CL1210	1209	5	15870	49.86767485822307	49.63847973829737	49.54591321897074	1.20096165199143	5.165588356899812	4.963571400000001	5.059515	1.04620077953758
CL1211	1210	3	15855	39.03500473036897	40.53893144408771	39.834552974864785	2.6117484365079835	58.908859167391995	52.31673966666667	42.884932	18.91231049683136
CL1212	1211	6	15813	44.754316069057104	44.21933186859349	44.17803882753614	4.073063901841002	461.5306873161323	370.89004766666665	324.018967	210.0806284019701
CL1213	1212	5	15804	48.715515059478605	48.63731037514097	49.53886693017128	1.8843583122195755	5.053084295494812	4.9735754	4.869541000000001	1.2636815042963316
CL1214	1213	3	15790	58.777707409753006	58.60788653003194	58.71419865935405	0.28901197957519004	4.132585514059531	3.8334973333333338	3.6769910000000006	0.4495239247146793
CL1215	1214	3	15786	46.26884581274547	46.34273937334837	47.013142174432495	1.3817633780888252	3.93495868491068	4.132543666666667	4.310904	0.4678625853676362
CL1216	1215	5	15740	49.269377382465066	48.98668387759206	49.39759036144578	1.7646640356409278	4.038933923379924	4.0715356	4.042964	0.6685485162258907
CL1217	1216	3	15731	28.37708982264319	28.75499706248751	29.514221796100987	1.457279616958839	8.517223892441676	7.565302666666668	5.664192	3.6647829345951113
CL1218	1217	7	15728	56.52975584944049	56.75638634685466	57.05939629990263	1.9167716212462416	26.0496438736648	39.535833714285715	50.415535	20.141014252678605
CL1219	1218	3	15720	34.18575063613232	33.89347141657252	34.866220735785944	1.8174423848901773	24.955559677798988	29.18796233333333	26.762105	11.706214255782449
CL1220	1219	4	15705	55.84208850684495	55.7242108287438	56.199778103305036	3.0992273960719325	11.23352622699777	10.58003725	10.106088	2.4902851925814007
CL1221	1220	7	15694	43.507072766662425	41.922474381788454	46.33629817873782	8.493339010166364	949.7274998936535	755.4692811428571	7.724517999999999	870.1874728845472
CL1222	1221	2	15688	51.10275369709333	50.603922856074455	50.603922856074455	2.209389676426838	4.3705422867797035	4.353057499999999	4.353057499999999	0.07744250000000008
CL1223	1222	5	15680	58.38647959183673	57.85341438805865	57.86608600979857	1.2096754442668325	3.070047459693878	2.9683428	3.139563	0.4549588160624651
CL1224	1223	3	15652	51.354459493994376	51.519886234060685	51.390099009900986	1.5208049199042433	4.92781078533095	5.120732333333333	5.083042	0.2468113781849524
CL1225	1224	4	15651	53.197878729793615	52.97508019421225	53.09943524078892	0.5677184683821199	5.41239629058846	4.9648015	5.197946	1.2480914216742098
CL1226	1225	5	15647	54.591934556144956	54.262338156863215	54.5757071547421	2.698075083122631	5.1507053235124935	6.413405	3.2971589999999997	6.396455994768977
CL1227	1226	3	15644	61.09051393505497	60.97686892699885	61.31991336475985	1.7326104037494194	4.017117645231399	4.211975666666667	3.569723	0.9641054620076004
CL1228	1227	2	15638	60.77503517073794	60.466100614153184	60.466100614153184	0.4403936732791571	3.051176427036705	2.887692	2.887692	0.2330510000000001
CL1229	1228	9	15634	63.604963541000394	62.846694007307356	63.40981012658228	3.634550928731504	2.4062209966099526	2.322148777777778	2.327386	0.3238212141310138
CL1230	1229	4	15615	45.449887928274094	44.54032760887745	44.19098069297722	1.699502521269059	4.619916481396093	4.21721225	4.255517500000001	0.6726329090694176
CL1231	1230	4	15607	50.579868007945144	50.001405270720845	50.527625945862454	1.5217183384986666	5.292988924521048	4.4330935	4.0760935	0.9155889052316272
CL1232	1231	8	15523	63.963151452683114	63.37122452823	64.6899245616188	3.7755370124985066	4.95768264034014	4.959236375	4.204167	2.1089289021129263
CL1233	1232	5	15510	58.2849774339136	58.04242563175561	57.467811158798284	1.9724743413284744	3.2111182871050934	3.1719386000000003	2.985859	0.45456773040531606
CL1234	1233	4	15507	48.93274005287935	48.72658600334688	49.29236352771174	1.3709542944820146	18.696039760817694	12.5102135	9.547479	8.245992969863531
CL1235	1234	3	15504	41.56346749226006	41.22075966124708	39.86498182447637	2.1554807656735018	113.82844450928793	110.83716899999999	111.130899	16.303003101962034
CL1236	1235	3	15498	59.898051361465996	60.175030423275565	59.93876856786483	1.1639932783750728	22.63112509898052	21.74413433333333	25.805957	6.467589008344163
CL1237	1236	4	15483	62.287670348123754	62.42572599369893	61.65440120309704	2.540276857343708	3.129524822708777	3.1411165	3.02137	0.3116761338100016
CL1238	1237	2	15458	48.744986414801396	50.341352333344545	50.341352333344545	7.223836173547998	11.633744122719627	13.782082500000001	13.782082500000001	9.7216085
CL1239	1238	5	15444	55.87283087283089	56.11004299704982	56.67022411953042	2.1312180196513606	3.231436971898472	3.214142	3.3826650000000003	0.4952124297624202
CL1240	1239	3	15444	58.6052836052836	59.1303148961799	59.612994851766366	1.3842294321039772	3.8088684835534834	3.662117666666667	3.686468	0.35700115765669743
CL1241	1240	3	15442	47.15062815697448	46.03375933556274	46.612466124661246	1.5164464492349028	5.247348897422613	4.626003333333333	4.924847	0.8052991894239612
CL1242	1241	4	15422	59.79769160938918	60.11482867769577	60.153073158913706	1.23246004671905	4.746828769874205	4.596706	4.821814	0.6974533992321638
CL1243	1242	4	15422	60.251588639605764	57.926533426407175	61.77111568916618	8.048058328028045	6.50668629613539	5.54964725	5.5807590000000005	1.5798433212278318
CL1244	1243	5	15406	48.20199922108269	48.604265929444765	49.115646258503396	1.8436230896998989	17.930017371997927	17.861795800000003	18.878746	6.2673626527630075
CL1245	1244	8	15396	58.9698623018966	60.704074029594544	63.24789800131262	6.699271980554657	2.939968477916342	2.849907125	2.59105	0.6221537978354785
CL1246	1245	8	15392	53.664241164241155	53.37890866832572	53.786335997437	2.709777796560564	3.617779586863305	3.655457375	3.660476	0.6365106089137357
CL1247	1246	4	15387	59.147332163514655	58.088562201223716	59.67477131106593	4.25779885685059	3.5325111602651584	3.3514269999999997	3.5720815000000004	0.8092475361454614
CL1248	1247	4	15382	50.44207515277596	50.067771409282685	50.367159297643134	1.0004080365008872	18.603588994279026	16.727096749999998	17.1815655	3.5986293435304204
CL1249	1248	4	15344	52.0985401459854	52.25944409057908	52.05416961963097	1.0198549606657779	5.349033394290927	5.244141750000002	5.009767	1.3013215993681917
CL1250	1249	3	15338	59.9100273829704	60.407450868935825	60.36230048137826	1.9626770431209155	4.959998250880168	5.035262	5.121155	0.2489185272908924
CL1251	1250	4	15325	34.07504078303426	35.505879798738796	31.725810120859407	6.829959856838112	672.600386790734	642.897243	728.497633	370.23343031744855
CL1252	1251	5	15323	50.44051425960975	50.5844295427839	49.457762557077615	3.6584550212847002	3.565585302160152	4.0211942	2.6863200000000003	2.6429527302458062
CL1253	1252	4	15322	56.77457251011618	57.84017600480305	57.451801713748104	4.812713054677407	5.005060802636732	3.3833585	2.8972035	1.697419541113584
CL1254	1253	4	15317	45.792256969380425	46.858717345811776	45.215395442229436	3.221419065605436	17.852024225892798	20.673996	20.9626155	5.113031390388827
CL1255	1254	5	15311	62.25589445496702	63.33037860452962	62.396430847673685	1.942825102918005	4.2976371801319315	4.3282750000000005	4.188329	0.3340303134842705
CL1256	1255	2	15308	54.34413378625555	54.322876047457065	54.322876047457065	0.19052310628059388	4.019104380977266	4.011914	4.011914	0.06444399999999995
CL1257	1256	2	15302	34.82551300483597	33.73854030713903	33.73854030713903	1.5366644697116136	19.641781745327407	46.9142825	46.9142825	38.555414500000005
CL1258	1257	4	15295	56.71134357633213	56.75846680092618	56.4488420466684	0.7170102915587132	22.43756053592677	22.633147	21.9667615	5.012058605497894
CL1259	1258	2	15293	49.91826325769961	50.11949978605803	50.11949978605803	0.3309506643924358	7.022042619106782	6.7959214999999995	6.7959214999999995	0.37187550000000025
CL1260	1259	5	15291	51.415865541821994	51.41797294753837	53.8642604943115	4.452039678982695	89.85429056274933	77.16706059999999	77.0322	25.76977601022431
CL1261	1260	5	15277	35.517444524448514	39.544197108979894	40.49008168028005	4.603027412349807	72.6784435044184	116.5592768	158.29790400000002	70.25134125530451
CL1262	1261	5	15256	53.91976927110645	50.380437696826895	51.32708821233411	4.448865090037576	26.581634320529638	35.516112400000004	22.710020999999998	31.864496354131365
CL1263	1262	3	15253	50.34419458467187	48.70513415712889	50.37492189127265	3.548688017391647	36.25629588841539	27.04525533333333	38.023897	17.931056814135047
CL1264	1263	4	15244	63.34295460509053	63.54941009529293	63.771499469907646	0.6086485691847799	3.4084560359485705	3.3955192500000004	3.3958410000000003	0.31006722627389605
CL1265	1264	4	15244	45.591708213067434	46.213415046208716	46.08123688870321	2.3124226587324257	27.560428217790605	30.39413275	31.3185705	10.565783590228136
CL1266	1265	5	15242	53.62157197218213	53.49540270307951	54.06546990496304	1.8199213585887009	3.644286494095264	3.5810254	3.746753	0.4676884319666674
CL1267	1266	6	15225	60.118226600985224	58.896085300920106	60.631311952050474	4.87850785765101	3.022705952052545	2.857098666666667	2.7976305	0.6609668140380087
CL1268	1267	5	15212	55.055219563502504	55.13408363076728	54.52765540871268	1.8230744835548292	3.1474274527346826	3.1628477999999998	3.105442	0.13529247904950226
CL1269	1268	3	15211	54.26993623035961	56.32922160723078	58.12220566318928	2.8591986327389205	3.0630542723029386	2.935064333333333	3.0376220000000003	0.3284823820991859
CL1270	1269	2	15208	51.781956864807995	50.03216337233985	50.03216337233985	2.17693549030232	4.854155830089426	4.983605000000001	4.983605000000001	0.16104900000000022
CL1271	1270	3	15204	47.18495132859775	48.068215853660504	48.12392426850258	2.252999568808684	4.297006767166535	4.2879190000000005	4.288908999999999	0.08726261404901102
CL1272	1271	4	15196	58.94314293235062	58.38880728410869	59.72074933741311	3.8115215294871088	4.257347372334825	3.7239800000000005	3.9283309999999996	0.8479315960512382
CL1273	1272	6	15190	60.855826201448316	60.65020602690053	60.72655588588529	1.9021338520757385	4.131033731928901	4.0803363333333325	3.9600294999999996	0.3893910392650155
CL1274	1273	2	15186	41.64361912287633	41.221810365009816	41.221810365009816	1.1932913183608136	214.18199986757537	193.8594325	193.8594325	57.49227049999999
CL1275	1274	2	15184	55.472866174920966	56.30728077590425	56.30728077590425	1.0152044311963344	63.90722215753425	60.4693475	60.4693475	4.182747500000001
CL1276	1275	3	15179	38.86949074379076	41.22775157251499	42.215568862275454	2.3045777444768016	32.007664422557475	74.87068833333333	98.72716	41.37078491024883
CL1277	1276	5	15176	50.88956246705324	54.90843004454054	56.96409140369968	4.324267296352173	3.5954141372561934	3.1442708	2.9859310000000003	0.4943100847603252
CL1278	1277	2	15169	55.46179708616257	54.340635198205405	54.340635198205405	1.42831147043103	27.86713711444393	20.3983495	20.3983495	9.5149105
CL1279	1278	3	15164	61.441572144552886	61.10737520255807	61.61626804340955	1.5240021995604291	54.80184165200475	48.126349	57.931152000000004	16.137086444812912
CL1280	1279	2	15159	38.33366317039382	38.798674047231934	38.798674047231934	0.5812731823195207	6.9365189297447065	6.5138775	6.5138775	0.5283105000000003
CL1281	1280	6	15150	61.18811881188119	60.98240145261239	60.94219561266639	1.2708152374188495	3.1481660703630365	3.130368666666667	3.067832	0.4402838457229104
CL1282	1281	5	15143	60.29188403882982	61.598558241330245	63.65330848089469	4.372410762042766	6.720028604965991	4.955392400000001	2.577701	4.751891350584253
CL1283	1282	5	15130	47.984137475214816	48.58467257625041	48.29976175005415	1.5157325721726624	14.96602705657634	14.419620000000002	13.902284	2.920654404430418
CL1284	1283	8	15118	60.45111787273449	60.78995530386717	60.76416005930084	2.588080687399996	2.449362206508797	2.457906875	2.3838075	0.35859935257520936
CL1285	1284	4	15102	58.85975367500994	58.59938508273575	58.709652393386094	0.6207177756301794	4.020614192159979	3.919325	3.817078	0.22533361669755345
CL1286	1285	4	15100	49.556291390728475	48.75494962954266	49.55941446613089	3.401260697042342	8.636920380397349	7.76435325	5.198849	5.46788145829495
CL1287	1286	4	15098	59.16677705656378	59.43831167310321	59.05546621886036	1.974329017056322	4.077084308385216	3.83531325	3.8268824999999995	0.5915167741207239
CL1288	1287	3	15071	53.81859199787672	54.85829873350453	55.45184556639797	1.5014861436975624	3.988541518545552	3.6847693333333336	3.8040300000000005	0.5338403699242771
CL1289	1288	8	15060	54.26294820717131	55.511510807306344	58.888231016458455	7.051870162208718	6.867326302988049	7.14330025	6.4327105000000016	3.0626403475324917
CL1290	1289	7	15057	56.97682141196786	57.65807027419141	56.09228550829128	4.022944300275287	2.4324357319519163	2.4547657142857138	2.420312	0.4289177657222933
CL1291	1290	2	15053	57.15804158639474	57.076037484259004	57.076037484259004	0.15339974517821986	18.100376807613106	24.4095795	24.4095795	11.8022155
CL1292	1291	5	15050	59.3687707641196	60.80756457674963	61.90045248868778	3.7142309133866624	3.5105088042524915	3.1972354000000003	2.8446599999999997	0.8242008800183606
CL1293	1292	5	15043	60.07445323406235	59.96212717342957	59.77763243950295	0.5037645505079626	3.6495081834075647	3.5788546	3.4468739999999998	0.4100141114145219
CL1294	1293	6	15041	45.854663918622435	47.08987210871152	48.21258208691922	4.548346437819569	16.41588297121202	13.145617833333333	3.2596305	18.286535521441643
CL1295	1294	6	15032	54.177754124534324	53.34255656488866	55.38596299672317	6.510930288090542	3.4605395401809464	3.311010833333334	3.273941	0.7472216330463621
CL1296	1295	3	15015	42.17116217116217	43.22174187272507	40.61459951187042	5.561957099378382	24.802573057209454	34.719324666666665	10.750594	34.39425392379982
CL1297	1296	7	15002	55.79256099186775	56.17382290777583	55.229591836734684	2.7731635866593503	7.773065801359818	8.230761285714285	4.7754959999999995	6.2348570021144765
CL1298	1297	3	14999	40.416027735182354	40.469513309481975	39.142701128503816	5.244387202840224	323.1537033378225	165.586848	38.407932	185.5205781562901
CL1299	1298	2	14991	54.566072977119596	54.80327293485658	54.80327293485658	0.5411451173999461	749.5435461282103	696.0680365000002	696.0680365000002	121.9983815
CL1300	1299	5	14974	45.23173500734607	43.885178339916564	44.619105199516326	4.229485604204393	78.40015259990648	45.6684784	5.824773	73.01594700174384
CL1301	1300	3	14971	46.97748981363971	46.96201737058514	47.351209941138	1.4875354610194182	5.337623002404649	5.199745333333333	4.932561	0.478264685183378
CL1302	1301	4	14948	59.82740165908483	59.257805764954604	59.21647479367082	1.9659138568613248	4.401848617139415	4.29850625	4.1445595	0.5416962668407337
CL1303	1302	8	14941	52.2187269928385	52.66965609205365	53.00622049142474	5.33371934147536	345.79043344950134	271.938250375	59.2075165	354.34808728110505
CL1304	1303	3	14937	52.49380732409453	52.28461426238266	52.136752136752136	0.4196523048183311	4.521507066813952	4.545089	4.5205910000000005	0.0718934992517867
CL1305	1304	3	14921	43.70350512700221	43.06189271344474	44.06688241639698	1.7613075283150603	5.961262897258898	4.983601666666666	3.649027	1.9373236074685325
CL1306	1305	3	14918	54.16945971309828	55.62401747587345	53.739522888459064	3.124679049164839	3.3723394469768064	3.15057	2.978986	0.40034533296143227
CL1307	1306	5	14908	49.03407566407298	49.1090911939331	48.98550724637681	0.5104585346077085	3.399148160920312	3.3360635999999997	3.412731	0.30302981223345005
CL1308	1307	5	14898	45.193985769902	44.04488172074593	45.77348066298342	3.9933096817784817	4.027024434823467	3.8938086000000003	3.931207	0.9958550063577728
CL1309	1308	2	14898	45.03960263122567	45.580547910835115	45.580547910835115	0.635668305381099	53.86156099637535	42.512598	42.512598	13.33624
CL1310	1309	2	14898	47.388911263256816	47.48604502208924	47.48604502208924	0.12765514635545827	5.0232924816753926	4.754212	4.754212	0.35363100000000003
CL1311	1310	4	14893	48.4321493319009	48.468202770705226	48.622613785398556	2.5347464959455666	3.9294633830658703	3.94465475	3.7706095	0.6916146832678495
CL1312	1311	2	14872	37.943786982248525	39.914445581679225	39.914445581679225	2.4942667821900852	49.187509374731036	44.9888805	44.9888805	5.314213500000001
CL1313	1312	7	14868	57.81544256120527	58.00061692577008	59.59133882281184	3.7560500741503438	2.430075604317998	2.2889030000000004	2.140149	0.5224263988839549
CL1314	1313	4	14861	54.89536370365386	54.16186756214238	53.922115435422036	2.692041175612327	3.558409587510935	3.4447875	3.4379315000000004	0.2915479284633145
CL1315	1314	4	14817	53.44536680839576	53.408813489792024	53.960872219033575	1.5504792443743791	3.778508106296821	3.63998675	3.548328	0.4117014513791367
CL1316	1315	4	14816	45.03914686825054	44.65847327798693	46.776370839491356	4.3847683929209795	40.036908634179255	42.6714595	30.6352725	25.868989559218804
CL1317	1316	3	14801	55.81379636511046	55.5298308684292	55.33748204882719	1.4329014189217828	3.7792979224376735	3.963876333333333	3.6881449999999996	0.4734732883928675
CL1318	1317	5	14797	63.41826045820099	63.07323371250042	62.76549631556134	1.989854893940341	4.658890991146856	4.6905324	4.1638470000000005	1.1078161644012243
CL1319	1318	5	14794	38.71163985399486	39.166614127176224	38.478172726044065	4.872186197309615	44.76543825888873	46.917700399999994	42.674825	15.434290108552327
CL1320	1319	2	14792	58.389670091941596	56.43296065993879	56.43296065993879	2.3036967461147317	47.675806361005954	35.299462	35.299462	14.571067000000001
CL1321	1320	2	14782	51.46800162359626	50.80379416710882	50.80379416710882	0.8626176965205907	4.799104458530644	5.207924	5.207924	0.5309409999999999
CL1322	1321	2	14780	36.32611637347768	36.64599694641	36.64599694641	0.7763275645221164	34.74860322023004	41.4783365	41.4783365	16.332587500000002
CL1323	1322	4	14774	62.02111818058752	62.16197505394529	62.30662263862386	1.5378650878226743	4.2147507942331135	4.212000499999999	4.2874485	0.3768673968934563
CL1324	1323	4	14741	45.702462519503435	45.604423276977386	45.67725701566618	0.6039592898464516	3.5591038268095785	3.53174525	3.5458324999999995	0.09477635815796843
CL1325	1324	4	14732	44.82758620689656	45.80176746270495	49.3498678835304	6.811064637894988	4.073493838379038	4.0111085	3.8899165	0.9788446624333454
CL1326	1325	4	14729	55.88974132663453	55.956354111288135	55.977820090376675	1.112756335912876	3.67026723531808	3.33756375	3.2920830000000003	0.3625316148919808
CL1327	1326	4	14724	47.167889160554196	48.17355586070348	49.72388507323291	8.799830894222357	3.7407911099565334	3.73116925	3.915026	0.8568242208135155
CL1328	1327	5	14719	56.491609484339975	57.374179789876784	56.901408450704224	2.720081502324389	3.756137265371289	3.7920834	3.70951	0.1905838830316982
CL1329	1328	3	14719	38.20232352741355	40.3476282474924	42.68977300463754	4.842201554539102	124.79830953013114	142.11104333333333	114.71346399999999	81.50105077157711
CL1330	1329	3	14695	46.7574004763525	47.22341298243757	46.732778466442355	1.4709684514171681	4.260816089962573	4.107635666666667	4.084630000000001	0.1933587031475153
CL1331	1330	4	14690	46.3784887678693	46.98558653463307	46.27951841490521	1.713968340007754	33.633727372226005	17.042844750000004	8.530803	18.20454302854288
CL1332	1331	5	14687	56.67597194798122	57.7494366623384	56.549520766773156	3.2548151144538537	3.438725646762443	3.4313468	3.414589	0.4128185817268405
CL1333	1332	4	14670	50.47034764826176	50.56917368109534	50.72349257710271	2.9503284251087862	3.424875627471029	3.3152775	3.3357675	0.43281203494733145
CL1334	1333	6	14664	57.80141843971632	57.62109592042013	57.696583361476975	1.8996402245704664	153.04045475756956	160.44598200000001	48.3977135	251.93287711814574
CL1335	1334	4	14641	56.64913598797897	58.10196667743814	58.22559012897874	3.648545419823882	32.5694541726658	34.66548925	38.2579365	19.225305623942596
CL1336	1335	2	14641	43.125469571750564	42.95827861762346	42.95827861762346	6.104346033353798	18.06963365214125	17.995943500000006	17.995943500000006	2.6905175000000003
CL1337	1336	4	14633	61.58682430123692	60.066550487346326	61.04235021013471	5.011538410839981	3.2724730843299388	2.94303175	2.972636	0.6572923170197468
CL1338	1337	3	14581	48.26143611549277	48.2411969586482	47.71134020618557	1.0759467750482714	11.323877559563815	18.712894666666667	4.09079	20.82803731342822
CL1339	1338	7	14574	51.79772197063264	52.719351715180636	52.95055821371611	3.7852033504128717	3.393991256689996	3.4333181428571433	3.279732	0.7036164121716219
CL1340	1339	4	14561	60.634571801387274	60.31354367262526	60.6509207545477	1.4236263199705153	4.091474331021221	3.80722025	3.2756785	1.0603509477864803
CL1341	1340	3	14558	48.28273114438797	48.47245104500158	48.14000676361177	1.0634628599462297	18.696818156546236	18.078002333333334	18.678678	3.9660984757858566
CL1342	1341	3	14545	57.552423513234785	57.78845118318753	58.15770081061165	1.2249245461134006	3.179520371811619	3.2192393333333333	3.320494	0.2423927759791716
CL1343	1342	3	14545	41.90443451357855	42.2225997569633	40.88656756394804	2.5687481330409505	5.2149063887934	5.873314333333334	4.0086	3.178004752839569
CL1344	1343	8	14533	57.5242551434666	57.01930934006861	57.31209543422057	1.9913465717197785	4.4403368194454	4.613553	4.801140500000002	1.177457901880148
CL1345	1344	3	14521	32.883410233454995	37.795580543973216	40.739517992736886	6.0086457861354186	3.9857112047379655	3.2815160000000003	2.7759560000000003	0.9046485735978732
CL1346	1345	4	14516	62.51722237531001	62.36265023068503	62.80365985120486	2.907883271236402	3.3216831264122346	3.2973519999999996	3.2003805	0.5182317777582729
CL1347	1346	4	14502	64.61177768583643	65.3510946118691	64.77818943494	3.120572712880225	5.453178250034476	5.192601	5.096470999999998	0.93582095262315
CL1348	1347	4	14500	51.186206896551724	51.507836712613575	51.98108307864407	2.1832133048063502	24.450733332	23.37146625	24.0686345	4.9249344720417545
CL1349	1348	7	14496	55.16694260485652	55.47214162803947	55.33351336753982	2.229925191594092	3.0699746457643484	3.101531714285714	2.907743	0.4228580290201141
CL1350	1349	6	14492	54.80264973778637	55.004536811935495	54.59714355674552	3.0300719355332104	5.307347820728677	4.2734584999999985	3.9582300000000004	1.9356588815565916
CL1351	1350	3	14492	49.28236268285951	48.59181393222929	48.51419031719533	1.7196912832294478	4.392838159260282	4.142141666666666	3.985326	0.6711309661262512
CL1352	1351	5	14486	59.878503382576284	58.474209988410045	56.94016039481802	2.798093201818921	3.3912784210271987	3.2887146	3.392458	0.6237977186023047
CL1353	1352	2	14479	57.31058774777264	57.273690303245246	57.273690303245246	0.2295823374782984	4.282808329580772	4.3096700000000014	4.3096700000000014	0.167138
CL1354	1353	3	14477	53.45030047661808	53.16321634119032	53.58570420879379	0.8005275844883403	3.5794588672376872	3.468983	3.593843	0.3809791986447553
CL1355	1354	2	14467	49.04264878689431	47.89771413118394	47.89771413118394	1.4528348095923	18.320096891477156	17.564321	17.564321	0.9590220000000008
CL1356	1355	3	14450	58.11072664359861	56.019270969114416	55.68487018800358	2.3218910637554915	3.1859593608996537	2.776596333333333	3.0716080000000003	0.6027061757928891
CL1357	1356	4	14426	59.46901427977264	61.04599871180957	61.30988686669946	2.1002994441241447	29.78457897809511	56.53416125	67.2440615	30.25454493092775
CL1358	1357	5	14417	50.3155996393147	49.56971276774944	51.60537069468769	4.174114140671685	3.8177734066726794	3.6683196	3.639505	0.7462576444884433
CL1359	1358	2	14411	28.179862604954554	28.472304470435535	28.472304470435535	0.6842636342663564	5.023265828811326	4.863019	4.863019	0.3749499999999997
CL1360	1359	4	14397	46.231853858442726	43.348145160179435	43.26138330922146	5.7226403934392325	245.81151150274368	322.8988985000001	375.089917	130.9044718943978
CL1361	1360	4	14385	56.28779979144942	55.9429145037688	56.36757244933195	2.9333679353414577	3.4278657148418485	3.35183475	3.4446440000000003	0.5753803091761897
CL1362	1361	3	14384	48.25500556173526	47.68731086757472	48.195606694560674	1.0488132604013878	4.3279329151835375	3.835988333333333	3.286462	0.8037805963164879
CL1363	1362	3	14369	36.98935207738882	37.186773309812786	36.739069637363656	0.9807417639148313	25.040510649871248	12.880336	3.633174	13.929377233069491
CL1364	1363	2	14356	57.67623293396489	56.79887397221305	56.79887397221305	1.1435777424105282	3.8111716662719415	3.2228015	3.2228015	0.7669005
CL1365	1364	6	14344	54.04350250976018	54.166806095581904	54.70222726566053	1.3289133731652312	3.362749744631901	3.2084303333333337	3.1328270000000003	0.4348391439956722
CL1366	1365	7	14337	54.076864058031674	54.34973300356707	52.81442392260334	2.196551474348964	184.4585278462719	134.84523128571428	23.958051	217.6628646797089
CL1367	1366	7	14306	52.257793932615684	52.20219990881152	52.22150676110754	0.5606967639801489	2.964605993009926	2.9429784285714287	2.732964	0.7361460268153046
CL1368	1367	5	14288	55.0041993281075	55.21394675918472	53.28363507277246	2.7382077576816117	3.3621704806830914	3.3137462	3.098789	0.622445544329269
CL1369	1368	4	14286	45.01609967800644	43.09923558070281	45.16447724061044	5.517163861153811	3.9725440554388913	3.49904075	3.4496985	1.4435811638190583
CL1370	1369	4	14264	45.82164890633764	45.16953096655007	45.44504650495435	1.527132379010222	3.7494526397924846	3.5048894999999995	3.558808	0.5771355868708409
CL1371	1370	5	14257	56.10577260293189	55.461213441541084	54.73457675753228	2.7582144997805704	3.5510021754927403	3.4774936000000003	3.5441879999999997	0.26104560261655435
CL1372	1371	5	14254	47.88831205275712	48.98328804015909	50.350404312668466	3.3435442975447587	5.0404390006314035	4.9259504000000005	5.108672	1.0019152544886418
CL1373	1372	3	14254	45.60825031570086	42.87011306187611	42.58194364577344	4.8873667877492535	3.5796792515785043	3.430324666666667	3.589185	0.7645763926865357
CL1374	1373	2	14251	47.63876219212687	46.815371422285345	46.815371422285345	1.486651699101948	5.317310108132761	5.1146980000000015	5.1146980000000015	0.365821
CL1375	1374	2	14235	39.31155602388479	39.25150770743761	39.25150770743761	0.28445516959255457	32.62858598454513	31.359996999999996	31.359996999999996	6.0094389999999995
CL1376	1375	5	14203	57.58642540308386	57.794569762371246	58.31246870305458	2.2941515271209543	3.675762097444202	3.6191794	3.6336190000000004	0.4203160041171881
CL1377	1376	2	14193	46.072007327555845	46.109153724498434	46.109153724498434	0.08925322698599558	4.4315752783766635	4.4454925	4.4454925	0.03343950000000006
CL1378	1377	2	14192	27.90304396843292	27.81524502809963	27.81524502809963	0.8070223842033659	4.88381568151071	4.861564	4.861564	0.2045309999999998
CL1379	1378	1	14178	63.98645789250953	63.98645789250953	63.98645789250953	0.0	6.687823000000002	6.687823	6.687823	0.0
CL1380	1379	5	14173	59.9096874338531	59.87572476017058	60.18181818181818	1.3964823352501057	3.1008088991744867	3.1730023999999997	3.017161	0.3425654888727701
CL1381	1380	5	14159	57.08030228123455	56.996778037883566	56.265699134803235	3.1294204108727497	3.6003558057066174	3.6079946000000005	3.2532650000000003	0.788623393524336
CL1382	1381	7	14154	61.62922142150629	61.479154026810036	61.245674740484425	1.605530582167248	3.793354919810655	3.7567792857142863	3.796011	0.8392941896528662
CL1383	1382	4	14152	58.23911814584511	57.48213475894722	57.038123658377046	2.0298460303450407	4.117095528335216	4.02514275	4.043966999999999	0.3003647185825716
CL1384	1383	5	14139	54.12688308932739	53.75014646767971	52.7734375	1.4440358374390343	2.916571369120871	2.8373852000000004	2.785114	0.5314025537802393
CL1385	1384	4	14133	48.95634330998372	48.350641568549996	49.97844369686923	3.4942673363375487	3.766287197481072	3.979251	3.8034125	0.545053565835047
CL1386	1385	2	14133	43.585933630510155	44.67479778008918	44.67479778008918	1.9686474384035328	24.701620776056036	26.71317	26.71317	3.636846
CL1387	1386	4	14132	62.29125389187659	61.97122937649424	62.40553476460018	1.648253457287676	4.13028271341636	3.9268735	3.8541760000000003	0.3535816401098197
CL1388	1387	7	14129	58.95675560903107	59.26138264918601	59.74512743628186	1.6768979523284484	11.166901243612427	9.126810714285718	4.934476	6.224011233923728
CL1389	1388	4	14108	47.263963708534156	47.063960130305894	46.88098619810338	0.979644254271248	3.8271976410547213	3.53731975	3.270152	0.8264599754456879
CL1390	1389	4	14099	61.99730477338819	62.31118304438068	60.996964256721675	3.195633750908682	3.7173663516561466	3.64815375	3.6515475	0.20108040460394808
CL1391	1390	5	14094	56.10188732794097	55.6662389240694	56.57675657675658	2.407572964722498	3.7980348463175817	3.8180468000000003	4.101971	0.4065664986628388
CL1392	1391	3	14089	51.79927603094613	53.342607907650525	53.876272513704	1.6389981494847852	409.29968772027814	395.8595896666666	418.391971	102.8606577436706
CL1393	1392	7	14084	57.77477989207611	57.05997318804821	55.84883023395321	3.7149173731398126	51.82126925880432	51.93619614285714	46.223989	20.976605930053825
CL1394	1393	5	14080	59.02698863636363	58.872191064221	58.32376578645236	1.4118030658299359	3.979451504261364	3.900582	4.0266459999999995	0.9862701261181949
CL1395	1394	4	14075	61.8898756660746	61.958360251831614	61.918795041310396	1.1916679133740118	5.468480777406748	5.4379895	5.3187750000000005	0.4066285772185104
CL1396	1395	4	14071	50.85637126003839	49.58058016552728	49.68768733494618	2.5451118230352305	368.1278268289389	323.40840625	181.950298	327.29682356832296
CL1397	1396	5	14064	54.84926052332196	54.590327831347075	54.04411764705882	1.1360183174137877	3.7666601283418655	3.7223176	3.944299	0.5263323085665937
CL1398	1397	3	14062	42.81752240079647	42.88538965394002	42.74847870182556	1.0350322490337571	71.7351160017067	63.83717466666667	76.820984	19.16882202799294
CL1399	1398	4	14059	50.906892382104	50.73882919238054	50.693144204270716	0.4236901995227357	4.3457979243900695	4.2974305	4.300142500000001	0.5268189220408187
CL1400	1399	4	14028	53.15796977473625	52.713120784438296	52.75557634477182	0.8139991045198566	3.896603167735957	3.4817705	3.053881	0.8597480691657586
CL1401	1400	4	14025	52.01426024955437	46.1510574218444	48.80899543443539	11.04291196891108	167.52779270602494	110.05040349999999	28.966661	155.83982203173588
CL1402	1401	4	14017	58.78576014839125	60.14617296657952	61.31056798796647	3.6063182973160237	4.0037629708924865	4.052222	4.1267355000000014	0.3145270671396978
CL1403	1402	5	14012	55.94490436768484	55.973967108095046	55.8695652173913	1.6086854418436027	4.107626466742792	4.0330002	4.204683	0.2860796149517824
CL1404	1403	4	14008	62.143061107938316	61.85132312537271	62.17623191235789	1.6055333634253999	70.10258032617077	69.827658	70.5289445	2.242908609440541
CL1405	1404	3	14008	50.849514563106794	49.3620032250652	51.37614678899082	3.1826958376950665	8.066235982724157	7.693071333333332	8.256458	1.3719382515896583
CL1406	1405	5	14006	61.22376124518065	59.28523938403468	61.35986733001658	6.529582018981035	6.20558564301014	4.9915910000000006	5.618163	1.6992241868187965
CL1407	1406	2	13987	41.259741188246224	41.41356410539722	41.41356410539722	0.313861581647096	14.24145928211911	16.2236695	16.2236695	4.0445185
CL1408	1407	2	13935	44.52816648726229	47.88759012440792	47.88759012440792	4.2920664145616945	19.68102882791532	21.10772	21.10772	1.822769000000001
CL1409	1408	4	13924	59.91094513070957	60.96836751791847	60.351615105060226	3.0128864491876937	5.68641770382074	5.35525725	5.7681825	0.8804569078178599
CL1410	1409	5	13923	53.96825396825397	54.256649792927064	54.14394765539804	1.2196888283363612	4.000957941966529	3.899470800000001	3.9053379999999995	0.5142110485531791
CL1411	1410	2	13923	53.93234216763629	53.81687387134603	53.81687387134603	0.2343193542120829	4.433436159017453	4.2191005	4.2191005	0.4349505
CL1412	1411	4	13918	53.4272165541026	52.98363671844484	54.11919382924741	2.632454531567068	21.70735055223452	22.5979855	16.696278	11.431300563965644
CL1413	1412	2	13915	29.859863456701397	30.327967132541204	30.327967132541204	0.6794265828007546	4.825612484153791	4.683574	4.683574	0.20616099999999984
CL1414	1413	2	13913	39.11449723280385	37.203499799629796	37.203499799629796	2.5881151842451797	64.90863534888234	48.556058	48.556058	22.146735
CL1415	1414	5	13909	48.69508951038897	47.399315067169475	50.097087378640786	4.545371474533281	91.22739494873821	86.865038	65.393648	46.52686755841203
CL1416	1415	3	13893	38.32145684877276	38.50316027540763	37.28358936844672	1.7513453542221507	56.387336943856624	55.05614600000001	46.849404	24.44955527578811
CL1417	1416	3	13880	42.78818443804034	43.873802580825604	42.66294876263506	2.046564457440359	26.05493736541787	33.89905866666667	25.799163	18.934898047667726
CL1418	1417	6	13857	61.62950133506532	62.13917251277922	62.21049350382885	2.213156533124222	3.270546212311467	3.172023	3.131718	0.5168872798457449
CL1419	1418	5	13848	50.04332755632582	50.263590138163494	52.89855072463768	5.024958826953625	71.30928961568458	70.7411228	55.646455	36.33090554584844
CL1420	1419	5	13845	54.83568075117372	54.06334786313937	58.13510941960038	7.616692962440946	4.016915986710004	3.7908303999999995	4.1307730000000005	0.9849651138300484
CL1421	1420	2	13841	51.84596488693013	51.698541388823536	51.698541388823536	0.3939927857295622	6.007116493461455	5.6598074999999985	5.6598074999999985	0.9281915
CL1422	1421	5	13825	52.80289330922242	53.3805870773191	53.626081170991355	0.8426102480095108	4.109875866112116	3.6033873999999995	3.291271	0.980991455882996
CL1423	1422	3	13821	32.09608566673902	32.178345412269174	31.002407528999786	4.804013853776528	9.65107927168801	12.265411	4.606698000000001	12.249783411688904
CL1424	1423	4	13815	41.599710459645316	42.25890712827147	41.684943822224994	1.4033067912307076	39.355909388635546	39.04053225	39.095951	5.540130774846582
CL1425	1424	5	13805	57.24013038754074	57.49837701630626	57.22647456100855	2.24417085313633	3.5613452551973923	3.6208915999999998	3.471485	0.6026983569606276
CL1426	1425	2	13805	50.06881564650489	49.29454374928786	49.29454374928786	1.2035608085892449	4.533519719956538	4.460967	4.460967	0.11277899999999975
CL1427	1426	3	13791	40.714959031252256	40.68859530862093	40.6229997866439	0.09300951442604123	3.1650635592777903	3.095041333333333	3.120406	0.2090623121660674
CL1428	1427	2	13775	39.811252268602544	39.131680031867994	39.131680031867994	1.065093589830287	12.600807211470055	12.361659	12.361659	0.3748170000000002
CL1429	1428	4	13769	62.713341564383754	62.72644243138267	62.72603626412342	0.83570618758672	3.812634424576948	3.6605089999999993	3.8134035	0.4903447084454974
CL1430	1429	2	13751	52.556177732528546	52.48679488516759	52.48679488516759	1.859811957232857	4.539697016726057	4.5276905	4.5276905	0.32183550000000016
CL1431	1430	3	13750	51.97090909090909	51.77818883809152	51.58623771224308	1.4072072971294916	21.268122675490908	22.386249333333332	21.133731	2.717062621213619
CL1432	1431	3	13737	50.4913736623717	51.0048743005266	50.411311053984576	1.4256229366026107	4.115304488461819	4.223700666666667	3.985894	0.3910862531107712
CL1433	1432	4	13712	42.18932322053676	41.85701074022232	42.96161139502056	2.4678096599900066	144.7582711386377	132.40742224999997	137.50140549999998	21.482028945900606
CL1434	1433	1	13712	46.477537922987175	46.477537922987175	46.477537922987175	0.0	76.18614000000001	76.18614000000001	76.18614000000001	0.0
CL1435	1434	3	13692	62.781186094069525	63.887372356618435	62.44596999745741	2.5397194444291853	4.066707390446976	4.226004333333333	4.071539	0.3456206274875517
CL1436	1435	4	13686	54.38404208680404	54.18999303229969	54.17089897173481	1.5543635724714688	3.8281253005991527	3.8349254999999998	3.9283504999999996	0.39585051432611534
CL1437	1436	3	13683	50.749104728495205	50.710963102480854	50.77720207253886	0.5977764005372477	19.37225012285317	20.144800333333333	18.809037	2.7108795534670214
CL1438	1437	7	13680	61.56432748538012	60.8718578838327	61.067415730337075	4.9977316887586065	6.0564965324561415	6.2994712857142865	4.236226	6.360200211918303
CL1439	1438	5	13676	41.43024276104124	41.54323256564372	41.25269978401728	1.8289514586219024	65.03065212108804	67.87934720000001	62.536216	14.467164032674676
CL1440	1439	3	13676	56.97572389587599	55.521788572753245	54.5303408146301	2.4689039315964196	377.3764655020473	543.2543323333333	645.291806	276.09143080369626
CL1441	1440	2	13665	50.39882912550311	48.6176923781542	48.6176923781542	3.2080181432084953	409.4049100654226	299.3778005	299.3778005	198.1706145
CL1442	1441	4	13647	39.276031362204144	39.608662711954864	39.858670683259305	4.267162140345999	75.8621717458782	99.364998	64.1003665	72.11441426712081
CL1443	1442	3	13636	45.62188325022	42.55741005442783	46.71040473110332	7.088892589865278	5.066745696245233	3.8969356666666655	3.206633	1.2091592070970454
CL1444	1443	4	13629	43.31205517646195	45.158733644943716	45.36739397845832	3.694467418811042	150.27157253004626	212.95190275	244.578746	145.29706998459503
CL1445	1444	6	13625	47.89724770642202	48.12179914857926	48.79438441792776	1.7335349246068532	2.768874476770642	2.715617166666666	2.7271009999999998	0.2424844862552493
CL1446	1445	4	13606	57.033661619873584	55.20321522664469	56.3668179151013	3.7155424603155733	3.7522960094811113	3.34728975	3.534986	0.8100364508531006
CL1447	1446	3	13602	65.09336862226144	64.79587353031972	65.35748637383777	0.93214329706467	6.0358169600058815	6.050183666666666	5.803564	0.6423043173866696
CL1448	1447	3	13601	46.04808469965444	46.550691342795545	47.5020701076456	1.5582962449372857	28.028691924417323	26.81550733333333	25.233133	3.9411672331198466
CL1449	1448	3	13584	55.57273262661956	54.11852896447832	56.461864406779654	3.5724472586490803	3.55676541939046	3.503288	3.473967	0.13147011266697328
CL1450	1449	5	13577	55.380422773808654	55.63805894924891	55.96885813148789	1.3938261881694198	2.9132316447668853	2.8850613999999997	2.962359	0.21064110221473872
CL1451	1450	5	13571	47.38781224670253	47.65700726786825	48.22966507177034	4.671868783747152	145.07221814862575	141.64943259999998	88.339748	88.67763373049576
CL1452	1451	6	13545	43.86120339608711	45.23807441506714	46.062250665716356	4.925692487676726	80.54294262089333	95.404802	16.018816	133.50071695060743
CL1453	1452	2	13543	61.71453887617219	59.26931829425151	59.26931829425151	3.713762738695952	3.5234817871963378	2.946841	2.946841	0.875793
CL1454	1453	2	13538	43.477618555178026	42.01949389975729	42.01949389975729	2.24676662703002	3.7916053854335945	3.793039	3.793039	0.002208999999999905
CL1455	1454	3	13499	54.907770945996	54.66332684748265	54.69806763285025	1.3808111391953521	3.228987714867768	3.257405666666666	3.235141	0.05391952111763925
CL1456	1455	4	13457	58.7352307349335	58.594950967048085	58.69488953783482	2.4789891582787758	3.4804449022813415	3.33749125	3.5875555	0.5552778894406724
CL1457	1456	4	13443	58.863348954846394	57.39755608881074	58.147190566133794	3.6302725489939935	55.185175953433024	50.14885825	52.7856445	12.276269963567016
CL1458	1457	6	13436	52.09883894016076	52.989303082057425	52.84939556463726	2.3647722610665176	3.5511507356356065	3.5936120000000003	3.3542834999999998	1.0693197126809175
CL1459	1458	3	13431	25.21777976323431	25.01695430240457	25.213595839524515	1.406539332081494	14.177230968654607	18.521278666666667	11.803119	9.649748827137984
CL1460	1459	7	13422	59.491879004619285	59.13517061944744	60.372771474878434	4.144400896046614	5.228513061168232	5.328110857142859	5.270289	1.6731985657559707
CL1461	1460	6	13416	54.189028026237324	53.55965638005207	53.96804741713476	2.0232007608693863	3.5340110468843178	3.5035313333333336	3.5711654999999998	0.3703608744664527
CL1462	1461	4	13401	58.107603910155966	57.96159916510686	57.96621342335153	2.1048027951230925	3.4715595701813298	3.3416630000000005	3.4533820000000004	0.4708301027754066
CL1463	1462	6	13400	58.1044776119403	57.73590370267861	58.24069047604844	1.8256845372904995	3.1946208021641795	3.1555148333333336	3.2349975	0.2412402767818956
CL1464	1463	5	13396	60.25679307255896	60.4250556884626	59.99357842350297	3.3733917353053533	3.677926563675724	3.5000044000000003	3.9876370000000003	0.6898135924078619
CL1465	1464	2	13395	55.558044046285936	57.55642963456182	57.55642963456182	2.4266498916649084	4.564651737961926	5.5943785	5.5943785	1.2504025000000003
CL1466	1465	4	13387	42.97452752670501	41.99275855401368	43.284274842028246	3.050189087537558	129.97340062568165	156.29472325	172.738631	98.35719923454648
CL1467	1466	2	13384	59.481470412432756	59.512605550883094	59.512605550883094	0.4713944491169073	3.7392579621936637	3.7477945	3.7477945	0.12924550000000012
CL1468	1467	3	13377	57.5390595798759	57.128606822717934	57.473202456943284	1.3575965703533892	3.906476625177544	3.775604333333333	3.8611989999999996	0.4830089338175389
CL1469	1468	5	13369	46.27122447453064	46.511901911026456	47.75924108603207	5.3840277574268445	269.72962669825716	240.85371239999998	182.09022	203.73563129561933
CL1470	1469	4	13369	54.85077417907099	55.23103314892754	55.64312335883898	1.149190204403867	3.163841159697808	3.2024232500000003	3.1750995	0.2317558339302109
CL1471	1470	2	13353	62.12087171422152	60.28422657004034	60.28422657004034	2.361097777053164	4.911706086497415	4.041121	4.041121	1.1191799999999998
CL1472	1471	6	13350	53.550561797752806	53.46851265755426	53.26824361579924	1.7607905560442365	306.32684537303373	297.95734	229.6158685	180.4271306341056
CL1473	1472	4	13346	46.21609471002547	45.512474320889474	45.34385576247077	3.7968986729850505	508.4276555549228	429.00610400000005	432.03440199999994	274.2906113552733
CL1474	1473	2	13344	50.93675059952039	47.9415594009123	47.9415594009123	4.348110460642548	4.786876755395683	3.976063	3.976063	1.1770559999999999
CL1475	1474	5	13318	53.15362667067127	53.69575160010622	53.718847352024916	3.7300869707401394	10.959651752064877	12.0316054	5.22601	11.142135150768897
CL1476	1475	2	13313	43.67911064373169	44.02200794646268	44.02200794646268	0.6255984365160465	26.45216974092992	28.956895000000006	28.956895000000006	4.569742
CL1477	1476	5	13306	57.79347662708553	57.728765507164404	57.5591985428051	0.8382109360798553	3.2189181651134824	3.2850004	3.311014	0.2520456964842684
CL1478	1477	4	13287	56.03221193647926	55.86184700547649	55.565343902422	1.6325287998051643	3.608954650259653	3.4679467500000003	3.4027945	0.5077552805862167
CL1479	1478	3	13284	50.80548027702499	49.599399004945234	49.686847599164935	1.492868379540906	17.872249659214088	13.91782133333333	11.364099000000001	4.146334204340368
CL1480	1479	4	13270	53.27053504144687	53.2548177972058	53.37567899553075	1.1494099418967578	3.363714991107762	3.2028385	3.27483	0.5002954375029318
CL1481	1480	5	13265	61.8017338861666	60.82850813194096	61.47744174516609	3.7943341554623253	3.122341908857897	3.0520218	3.095063	0.2879197483142829
CL1482	1481	2	13264	49.11037394451146	50.05401833650711	50.05401833650711	11.697662818159126	30.479082284152604	28.8487705	28.8487705	20.2097715
CL1483	1482	6	13263	58.154263741235006	59.258765108208564	57.45955954005068	4.344609231000358	3.578499521375255	3.509942333333333	3.5771410000000006	0.4492858091165973
CL1484	1483	5	13258	60.74068486951275	61.766475663278996	61.08168385837747	3.4154157406459222	3.57157185865138	3.3176900000000002	2.984076	1.0065045348197892
CL1485	1484	4	13258	53.16035601146478	53.040463851402045	53.023731581005116	0.30647052705148325	3.1117731872831493	3.25365225	3.4405714999999994	0.3839141644537063
CL1486	1485	3	13256	44.79480989740496	42.845807301197034	44.00865566675683	4.545147261621034	212.34711387394387	233.8434	87.990685	222.10491176215618
CL1487	1486	3	13249	52.36621631821269	52.260343036375076	52.433401639344254	0.2590773582534106	7.299545232394898	9.883485333333333	5.558678	6.367263289368482
CL1488	1487	2	13241	41.40170681972661	37.97327589745132	37.97327589745132	4.144604568779987	56.35701023653803	34.2719145	34.2719145	26.6985075
CL1489	1488	2	13237	59.60565082722672	56.9386488076141	56.9386488076141	3.5735505348326875	4.268371073279443	3.856001	3.856001	0.5525399999999998
CL1490	1489	3	13231	37.97143073085934	39.08931847299435	39.65217391304348	1.2525419056809848	34.963552867281386	37.293828000000005	33.380614	7.374186946863903
CL1491	1490	5	13217	56.813195127487326	56.446978794853116	56.364712847838966	4.0057275404883095	352.3391155492925	317.51504639999996	383.48697400000003	157.33324097832212
CL1492	1491	4	13216	53.98002421307507	54.33017027794837	54.164202918823655	0.9935825680002626	3.480339045399516	3.3367364999999998	3.2807155000000003	0.2790118152914855
CL1493	1492	3	13209	43.78832614126732	43.22229756189719	44.279023084643704	2.151901838493784	3.6662965848285265	3.6727476666666665	3.81861	0.21207664711346425
CL1494	1493	4	13202	41.417966974700796	41.08316262947	40.770754968030545	1.1117044393074178	79.70086230843809	69.49500325	83.0664175	29.76152144980484
CL1495	1494	6	13196	47.01424674143679	44.86643596015879	45.64338201174304	5.404789210092259	13.018085729084573	15.351540166666664	13.820017000000002	10.484298785617415
CL1496	1495	3	13189	59.04162559708848	60.80752799651132	60.726846424384526	2.8638816321030043	30.44151939169005	65.43277433333334	45.184348	58.95285619399602
CL1497	1496	2	13188	41.765241128298456	42.05713380886391	42.05713380886391	0.3875836358535345	36.98950582135274	34.701615999999994	34.701615999999994	3.037926999999998
CL1498	1497	3	13175	33.229601518026556	33.02183930387999	33.29641934293097	0.4734932741011253	53.65335464349146	136.764714	191.773378	80.09124941863945
CL1499	1498	2	13143	60.5189074031804	60.190412875007546	60.190412875007546	0.4226533121660125	4.9042831022597575	4.0409485	4.0409485	1.1107985000000002
CL1500	1499	5	13132	54.55376180322875	54.83401687179404	54.57584621813623	0.7336571596059653	311.12593558049036	286.2943782000001	124.654426	276.9327655933843
CL1501	1500	5	13131	64.31345670550606	64.624770805976	64.34108527131781	2.1471153435095864	3.2305205518239286	3.2228354	3.22574	0.14007828570567246
CL1502	1501	5	13099	47.71356592106267	46.5556678754479	48.68857401266205	3.8824617695930983	3.31483724353004	3.1214918000000003	2.950282	0.6806607992512569
CL1503	1502	5	13093	62.621247995111894	62.18168386699234	63.04657794676807	1.5214526247210085	4.921874774077752	4.6331334	4.085714	1.310640118149082
CL1504	1503	4	13092	44.790711885120686	45.041680588713405	45.54570161968161	1.6072112845213709	3.725782547586312	3.77845875	3.7342775	0.1567355598362654
CL1505	1504	3	13092	48.47234952642835	49.20157725102481	49.71558589306029	1.0136768736562605	4.109324121906508	4.012425333333334	4.014019	0.1451811398456732
CL1506	1505	6	13090	51.51260504201681	51.15104828658002	53.797731128617755	8.27908181072275	3.5623395294117652	3.431764666666666	3.324608	1.1064088133640095
CL1507	1506	3	13087	43.715137159012755	44.410518153217936	42.99546142208774	2.053783246631604	3.7563581720791626	3.854961	3.662697	0.298758220641151
CL1508	1507	3	13086	53.58398288246982	53.636797911159064	54.46319819036018	1.9530792815695888	3.9108022792297112	3.9112410000000004	4.129441	0.3873309045248005
CL1509	1508	6	13075	52.634799235181646	52.63298813984881	54.06446603488094	4.47760243724542	309.64505819632893	247.72987566666663	130.0951445	295.96828783244115
CL1510	1509	3	13074	42.351231451736275	43.37902259061613	42.231724699653846	4.924123613193789	14.28084024651981	15.020243	19.027264000000002	6.906104806241263
CL1511	1510	5	13062	55.466237942122184	56.19446577579972	57.93829947328818	3.0928930448674037	3.0854212547083137	3.0582734	3.02763	0.6015769247697589
CL1512	1511	5	13053	62.83612962537348	63.0988064720789	62.893081761006286	1.8072959300898976	3.9639504140044433	3.9588330000000003	3.797045	0.6624937840001216
CL1513	1512	2	13044	47.63876111622202	47.92165804424987	47.92165804424987	0.4180003997729038	17.620659570070533	17.244940999999994	17.244940999999994	0.5551510000000004
CL1514	1513	6	12994	54.2635062336463	54.10957594304647	53.80173852518014	2.0217877091685907	3.2644409494382027	3.2189765	3.1668185	0.2686560131021017
CL1515	1514	5	12978	48.605332100477725	48.26520818831838	48.112352763515545	2.7595617842887465	3.181732451918632	3.3033638	3.494795	0.5790888202033951
CL1516	1515	4	12968	39.643738433066005	40.938963474242016	42.5395402815516	3.2982297833397074	43.339005122301046	48.123834	48.278455	42.51322483214649
CL1517	1516	5	12966	52.05151935832176	52.239001343090074	52.444870565675934	1.5422952587290748	4.712743692426346	4.948966	4.924473	1.0112080269916772
CL1518	1517	4	12963	50.45128442490165	50.71105207009757	51.693775190188816	2.8762645122800925	3.3724723004705703	3.37441125	3.1398395	0.6377155514813698
CL1519	1518	3	12956	59.9644952145724	60.69144252806752	61.15702479338843	1.7541062762394228	3.976176465730164	3.952700666666667	4.0	0.09663532729229464
CL1520	1519	1	12954	50.023158869847144	50.023158869847144	50.023158869847144	0.0	4.039169	4.039169	4.039169	0.0
CL1521	1520	4	12948	60.125115848007404	59.46271832490926	60.94266416056574	4.123085994892009	3.6324114343527967	3.596165	3.6037480000000004	0.4166333982267865
CL1522	1521	6	12938	57.47410728087803	57.61197859796324	59.164867134916136	4.0175980762271	3.3974911864275783	3.4747033333333337	3.295721	1.016130934654694
CL1523	1522	5	12938	54.513835214098	54.964691940975726	54.80817140009965	1.5180601152267723	18.595898789380122	15.1991474	6.311408	12.656557835510267
CL1524	1523	3	12919	31.240808112082977	34.08604113485451	35.60528992878942	3.1301649150919038	45.834988883427506	121.07772733333331	160.228871	82.84915432028556
CL1525	1524	4	12914	47.67693975530432	47.6832470734475	47.83865350486724	1.240518201527938	3.1340690844819568	3.07119325	3.257478	0.5840390780779892
CL1526	1525	6	12894	47.59578098340313	47.59390459394354	48.06858668715492	1.3021862553339176	3.6194734880564607	3.774561833333333	3.4167699999999996	1.0131464824656264
CL1527	1526	6	12891	56.65192770149717	54.974362715811004	57.080697449585436	6.818164163697545	11.748744388332947	11.205094	10.3634905	7.0700442996775035
CL1528	1527	4	12891	50.01939337522304	49.97300978576273	50.88120571653759	1.8754323544410751	3.627326587153828	3.593725	3.8300045	0.663556999240834
CL1529	1528	4	12886	53.39127735526928	52.654072283488524	52.64377303712981	3.1599019823285723	3.3438074724507216	3.21435225	3.205751	0.4644053530911195
CL1530	1529	3	12850	58.84046692607004	56.42537628181378	56.40750670241286	4.193226858479656	3.3386158708171205	3.148718333333333	3.348596	0.379587586374417
CL1531	1530	3	12830	45.705378020264995	46.070319526494934	46.79660711062986	1.5860957835140346	18.651179915666408	21.424271666666673	20.881204	8.564575871244156
CL1532	1531	3	12817	54.02200202855583	54.19141997712947	53.823263035321524	0.8645840174420754	3.515435771631427	3.3898466666666667	3.479525	0.2873925215430785
CL1533	1532	4	12807	52.416647146091975	52.5158987778085	52.53669166265251	2.1067544160646787	4.0262211524947285	3.724654	3.6648785	0.7055713149933887
CL1534	1533	3	12799	42.097038831158685	41.84481047625051	41.55216284987277	1.3616288106195102	4.38343136229393	4.352692	4.486769000000001	0.3248289006610507
CL1535	1534	2	12787	59.61523422225697	59.60662831176993	59.60662831176993	0.027823963943845342	3.814009101978572	3.555211	3.555211	0.8367260000000003
CL1536	1535	5	12784	48.53723404255321	50.38118901915604	48.33333333333334	4.859208781351602	27.17888745799436	16.8062236	9.523697	18.422570398428388
CL1537	1536	4	12765	60.79122600861732	60.21408914659948	60.72945574675429	1.8437913938134007	5.819004891500197	5.149984	4.587035	1.92078884037106
CL1538	1537	6	12752	62.06869510664993	61.59293282676703	61.65721121091578	1.3552486605133651	4.17607223219887	3.907848333333333	3.3054455000000003	1.3669058401508698
CL1539	1538	3	12745	46.873283640643386	47.59358240003638	49.24098671726755	2.6227695928001613	74.56529054146725	82.67007966666667	102.813135	37.03385502995896
CL1540	1539	6	12744	56.67765222849969	56.1623850156636	57.756351958488814	3.8033870757477737	3.5146827959824227	3.434749833333333	3.3620144999999995	0.36233610118572535
CL1541	1540	4	12731	63.70277275940617	61.87586487494463	62.430277589812405	3.282903725444096	3.664424071007777	3.6343504999999996	3.536093	0.3410922999764872
CL1542	1541	7	12709	57.077661499724606	56.60276661218104	56.54941373534338	2.641433029155173	260.07120819293414	257.51284742857143	157.570495	231.52033330549423
CL1543	1542	2	12708	47.875354107648725	47.867004535515754	47.867004535515754	0.1835750219131178	4.845344738668556	4.857717500000001	4.857717500000001	0.2720294999999999
CL1544	1543	2	12701	47.72852531296749	47.73435123049575	47.73435123049575	0.013885340312718595	3.5870374007558463	3.6308205	3.6308205	0.10435149999999993
CL1545	1544	5	12695	56.2741236707365	57.22540279980615	59.958826556870825	6.985062125422098	3.790080740606538	3.734666400000001	3.3702910000000004	1.0674269431820802
CL1546	1545	2	12681	58.268275372604684	58.2008737091741	58.2008737091741	0.1823598237600379	4.244572203138554	4.273942	4.273942	0.07946199999999992
CL1547	1546	7	12678	53.312825366777105	52.3819890568539	52.306182531894024	3.7468732341387376	3.2445902452279536	3.166073	3.255246	0.9304828000977312
CL1548	1547	3	12651	56.098332147656315	56.641087180413464	55.93321407274896	2.2039565734114377	22.27709770982531	31.15607366666667	32.898531	16.132350435512723
CL1549	1548	2	12650	42.83794466403162	42.44977196655772	42.44977196655772	1.0505743737793836	3.9062131833992098	3.6606184999999996	3.6606184999999996	0.6646925000000001
CL1550	1549	4	12648	58.222643896268174	57.901812300276745	59.173302803308545	2.3024827492307054	3.3321083514389627	3.26027075	3.0849450000000003	0.6024938906687666
CL1551	1550	5	12639	60.993749505498855	61.097025537444885	61.784068466096116	2.538867146063246	4.1595887245035215	4.1476784	4.573074	0.6070668227885955
CL1552	1551	5	12639	53.635572434528044	53.452456977748305	53.82815112002674	1.2710272658596402	3.2182467218925543	3.2243267999999996	3.0971029999999997	0.4141139228610408
CL1553	1552	4	12637	45.95236211126058	45.234390426468536	46.60703103114765	3.1926182395704568	4.110453577273087	4.2409975000000015	4.0460645	0.6359170730293771
CL1554	1553	4	12625	46.9940594059406	47.291022973450715	46.94804493707603	3.6593943937308837	3.695841399049505	3.62705275	3.6246575	0.4554227806068637
CL1555	1554	2	12616	60.8275206087508	62.61937508832764	62.61937508832764	2.3290785199197863	45.831421617549154	55.4853715	55.4853715	12.5483445
CL1556	1555	4	12607	52.87538668993416	52.98761121385515	53.170083889987524	1.853292815842679	4.0556191790275244	4.01718175	3.8803449999999997	0.4156181226693411
CL1557	1556	2	12607	42.07186483699532	41.92919798594394	41.92919798594394	0.5902858520527339	7.312831651701436	6.859553	6.859553	1.875446
CL1558	1557	5	12605	62.784609282030935	63.22329899319376	62.824048538334246	1.890306086846112	2.804407225704085	2.8837786	2.7807020000000002	0.4858185532692633
CL1559	1558	3	12601	51.74986112213316	49.91373587137318	52.200283907600976	4.118098748944576	4.91633370510277	4.309960333333334	4.629422	2.06414467583619
CL1560	1559	4	12598	46.16605810446102	46.87959510491084	46.21227961993165	2.9103023868138203	11.419825778060009	14.1187115	10.208565	11.376462380871976
CL1561	1560	3	12581	47.794292981480005	47.61245994695045	46.88172043010753	1.1565878154738756	3.844421311263016	3.883397333333333	4.031632	0.9998933833132188
CL1562	1561	7	12579	61.181333969313926	61.76092800562019	61.898693851545076	3.107833207144081	3.474732297400429	3.7298781428571433	3.4585220000000003	0.8803322956177122
CL1563	1562	2	12567	54.22137343837034	53.794138249434845	53.794138249434845	0.5162065781513689	3.8924793358796848	3.3589375	3.3589375	0.6446514999999999
CL1564	1563	3	12566	47.795639025943025	47.66204520726965	49.11683681737158	2.610082860773941	760.8464591159477	787.9541280000001	780.2628440000001	115.74717629248157
CL1565	1564	3	12561	63.38667303558635	57.4220715685071	57.909343200740054	8.211689251065565	4.147332897460394	3.7904116666666674	4.229307	0.9808633892298948
CL1566	1565	5	12558	58.24175824175824	57.29419179433141	55.51575931232092	3.2906744325873434	9.346511416626852	16.922912	3.83221	26.171121988738903
CL1567	1566	3	12537	58.6823003908431	57.862516078188236	58.54603463992707	2.009313893818501	3.5382575454255405	3.394184	3.601307	0.4255597004565478
CL1568	1567	5	12526	38.136675714513814	37.96310031686907	37.02366626554353	4.006993796380867	70.88269139422002	72.19865920000001	72.082099	18.769555314131555
CL1569	1568	4	12525	52.63073852295409	52.05225222726321	52.78405519686378	2.42392597322564	5.612579195129741	6.285059249999999	4.043707	4.767093269419606
CL1570	1569	5	12519	50.82674335010783	50.007277027074544	51.14345114345114	3.053946927224003	12.455862764198413	11.5899844	8.967812	5.006909413452198
CL1571	1570	5	12505	61.07157137145143	61.8016778896983	61.85468451242829	2.19633661031486	4.815191648940424	4.652370200000001	4.390805	0.9645895170646216
CL1572	1571	6	12504	48.52847088931542	48.33375201206278	48.40472359293428	3.2364355951452004	2.9792959535348684	3.003047	2.913112	0.6207131126406142
CL1573	1572	3	12493	57.03994236772593	56.251536791828144	55.52115583075336	1.6116068451999666	3.272646831665732	3.153972	3.111402	0.2363838673062668
CL1574	1573	5	12492	65.18571886007045	65.49236811734212	65.4058772185045	2.073666459783642	5.254349658581492	5.2797942	5.100067	1.0732374882948137
CL1575	1574	4	12482	53.20461464508893	54.01456690374103	54.13169869183479	1.498896085158319	3.1883219418362434	3.195227	3.1084985	0.19464151002933566
CL1576	1575	4	12473	46.21181752585586	50.637151971841384	51.35719717332727	7.671914060750389	70.64513165589673	104.99477399999999	101.3791775	56.65661746766235
CL1577	1576	4	12467	60.006416940723504	59.98229280399339	60.060119816151655	2.371839698781481	2.851974120157215	2.8670715	2.9208065	0.3632622361521357
CL1578	1577	2	12465	50.09225832330525	49.75833696939476	49.75833696939476	1.255604728957593	3.379176634175692	3.4461644999999996	3.4461644999999996	0.2518864999999999
CL1579	1578	6	12464	64.17682926829268	64.05560312217071	64.60296270971428	1.6404200292143554	5.503481376524388	5.372649666666668	5.3405559999999985	1.3340316269156522
CL1580	1579	2	12462	60.51195634729578	59.718614597928116	59.718614597928116	2.226717315454916	3.6028069778526723	3.4769089999999996	3.4769089999999996	0.3533650000000001
CL1581	1580	4	12423	56.0895113901634	56.66042349050446	56.99996816219166	1.779436711136297	8.240228869999196	8.24740225	8.221738499999999	0.6405951992277867
CL1582	1581	3	12414	55.71934912195908	56.383829483436	56.027214909037134	2.1266534593295683	3.5254924349121954	3.4834050000000003	3.617892	0.343055172712301
CL1583	1582	3	12395	39.54013715207745	39.525992523123215	40.20530367835757	1.9968293619668755	3.5781913385235984	3.582929666666667	3.6752309999999997	0.14898949684979662
CL1584	1583	4	12387	37.797691127795275	36.84867340850752	36.819467082624975	3.428088610900573	27.8869444207637	22.55565325	20.3724675	20.033073288151915
CL1585	1584	3	12377	61.82435161994022	59.33993550814373	60.431356283699714	3.677555224993992	3.705915254504323	3.568919	3.738548	0.3558826589041206
CL1586	1585	4	12375	41.842424242424244	41.260921230491206	42.43544932734754	3.1622756441463467	92.12041063725256	81.16835125	98.5648465	40.200353914312956
CL1587	1586	2	12370	48.1568310428456	49.26490323750157	49.26490323750157	1.9305426828020344	56.335239338722715	59.114006	59.114006	4.841316000000003
CL1588	1587	4	12369	58.02409248928774	55.817064232374534	55.568754661918746	4.454450111164059	293.727530809928	293.1017765	310.633179	119.16471158232058
CL1589	1588	5	12365	59.8948645369996	60.757889635941936	61.459307764265674	1.934670283303183	3.1984737080469063	3.1119012	3.150867	0.24023072930281006
CL1590	1589	5	12364	46.08540925266904	45.9566953664934	46.08599779492833	1.826419038272124	4.8001116821417025	4.615018599999999	4.714168	0.8115406723110309
CL1591	1590	4	12358	36.94772616928306	38.080816994091066	38.41364802658934	2.436868758585885	23.539759920213626	16.4645625	10.164057000000001	15.154320690974282
CL1592	1591	7	12347	58.346156961205146	57.350383418244846	60.12913640032285	5.961321472858226	3.7427372336599984	3.724995428571429	3.3352440000000003	0.694183115729325
CL1593	1592	5	12345	42.33292831105711	41.873826566838034	41.49720670391061	3.031147018688227	27.518028685378688	26.652667	25.077389	5.956694246901412
CL1594	1593	5	12344	62.896953985742066	61.25201647245851	63.19612590799032	5.93086567870925	6.195369632939078	5.1234224	4.647507	2.065707323220364
CL1595	1594	4	12328	41.56391953277093	43.305786284654026	42.72030287418421	4.543139763788639	58.917355493754066	59.30801775000001	43.6863805	30.875544743576906
CL1596	1595	2	12311	40.890260742425475	40.51229419698109	40.51229419698109	0.99447449048213	121.86659966087238	120.72708700000001	120.72708700000001	2.998192000000003
CL1597	1596	3	12309	53.1156064668129	53.75043896492458	52.94919454770757	1.2790879383956288	2.8628602712649287	2.737408666666667	2.816736	0.1996772826276327
CL1598	1597	3	12305	51.9301097114994	51.773421633704565	53.13420277660917	2.8030749624128712	23.00948827720439	22.463104	27.793276000000002	7.5568672060811455
CL1599	1598	2	12297	48.35325689192486	48.87063442554613	48.87063442554613	0.8673744418460493	34.42663025859966	23.4858425	23.4858425	18.3420405
CL1600	1599	2	12293	60.94525339624176	62.176776552038625	62.176776552038625	1.5525704188504466	5.938740331570813	4.7536000000000005	4.7536000000000005	1.4940959999999999
CL1601	1600	4	12289	42.73740743754577	42.82988851436368	42.46592078868055	2.5241262437769816	39.75399437716657	63.68784825	32.580371	64.38580913022128
CL1602	1601	2	12289	49.46700301082269	50.14412314481204	50.14412314481204	0.9016284891748968	112.82615441630726	100.95584000000001	100.95584000000001	15.806078
CL1603	1602	3	12282	50.61064973131412	49.48772761958344	49.394273127753294	1.5873283814455148	5.55780161610487	4.9230453333333335	4.694587	0.8414990858811965
CL1604	1603	3	12258	52.29238048621309	52.29251100449449	53.60582569884895	3.6193378891746915	3.512504326235928	3.509717666666667	3.525897	0.1404094758348675
CL1605	1604	3	12243	51.539655313240225	51.178624022642595	50.16042780748664	1.6630293897973665	3.9029350748999434	3.877774333333333	3.9340379999999997	0.2553056723489621
CL1606	1605	3	12237	58.51107297540247	60.06431278022964	57.69843799808734	4.191692762541384	63.70934201250307	29.73342233333333	3.99853	36.75801164428536
CL1607	1606	4	12232	61.175604970569	59.92946657048929	61.002517281388904	3.442816664677194	3.462749277387181	3.0669932500000003	3.3737160000000004	0.7822004075942991
CL1608	1607	4	12229	60.31564314334778	59.58605034179406	58.818033928412284	2.3475807054284843	3.1827714362580752	3.18489375	2.910336	1.1214684784106452
CL1609	1608	4	12217	49.210117050012286	51.28698388295723	50.449290060851915	3.0800266209684604	12.290486464025538	15.56504825	14.6560905	7.6002271110777135
CL1610	1609	5	12212	55.42908614477563	55.45074083541014	54.61254612546126	1.5059438501187237	3.382117918113332	3.3620502	3.2712	0.4701161359768031
CL1611	1610	2	12207	65.52797575161792	64.00570498152311	64.00570498152311	1.9521335529516928	6.689558636520032	5.3233365	5.3233365	1.7520195
CL1612	1611	4	12191	58.108440652940686	55.984979579605685	55.53901856290676	5.540607357505777	3.39315885792798	3.1598352500000004	3.2230575000000004	0.6253154023832193
CL1613	1612	3	12191	45.75506521204167	53.51388375199004	57.53581661891118	8.497938952569095	28.773266165121807	14.584083333333336	4.102564	15.510323252188229
CL1614	1613	4	12182	52.89771794450829	53.02556549814314	53.58150570732333	0.9906084433993044	3.8860726852733536	3.95137375	4.024899	0.4751739382791184
CL1615	1614	5	12161	58.07088232875586	58.412851508580395	58.01781737193764	1.9306682908721975	3.5402026638434334	3.5259122	3.3354470000000003	0.4500060062005394
CL1616	1615	3	12161	57.70906997779788	57.61018128806635	57.350377687391045	0.4227470656354456	4.202524325877806	4.092357666666667	4.161433000000001	0.2945410365357525
CL1617	1616	3	12140	45.88962108731465	45.59111036065004	46.25144175317186	0.9962027960599956	3.6069483985172974	3.4063160000000003	3.451968	0.4617961963384568
CL1618	1617	2	12138	27.739331026528262	29.290588992166576	29.290588992166576	2.7367978469357443	22.705935795435824	44.5217325	44.5217325	38.488392499999996
CL1619	1618	5	12136	55.19940672379697	53.1726544148213	55.102040816326536	6.141116453421122	6.057297997363215	6.9684288	4.548613	5.483838434197762
CL1620	1619	5	12135	51.9406674907293	49.47419882228952	50.51480051480051	6.4716762723852685	3.4705255377008664	3.4256614	3.689757	0.6774774399286223
CL1621	1620	3	12132	39.02077151335312	39.4061806045707	39.00986031224322	0.8156339822385186	85.45573416559512	85.93969366666668	89.110448	5.936879906919142
CL1622	1621	7	12128	60.281992084432716	60.29387645283306	59.55947136563877	2.2098337615455472	3.93828405969657	4.101894857142857	3.6228569999999998	1.569009188934344
CL1623	1622	3	12128	64.9901055408971	65.95757871574506	65.80823512294485	2.794810760722826	3.6960461622691287	3.238505	3.358081	0.77159017227714
CL1624	1623	4	12125	45.1298969072165	45.35817656616885	45.75256991432378	1.1103774831604427	41.89926481030928	43.449111	41.3205795	6.653557543456019
CL1625	1624	2	12106	30.61291921361309	30.208557047117523	30.208557047117523	0.5367553056573762	5.697787109202047	5.880444000000002	5.880444000000002	0.24246100000000004
CL1626	1625	5	12104	57.65862524785195	56.9803809076815	57.71230502599654	3.393696649486078	39.102673370786526	36.743471	41.196706	15.87487804070406
CL1627	1626	3	12103	41.973064529455506	42.147491636817314	43.1362467866324	1.5732726736125289	7.323083129058911	7.553411666666666	7.630721	2.9129464970380456
CL1628	1627	5	12099	58.78171749731382	59.12830739466051	57.539554407491124	2.3420841486768915	3.6131163881312514	3.5347392	3.450593	0.3263526759089927
CL1629	1628	5	12095	42.133112856552295	41.3443826554681	40.26920919798093	2.045687288813624	48.5476902463828	56.78792760000001	68.714866	46.37862016751063
CL1630	1629	3	12083	49.64826615906646	49.447628376333064	49.783116449783115	1.5949196800415557	20.950077714640404	18.381370666666665	16.609043	2.9577000980525763
CL1631	1630	2	12082	40.092699884125146	39.273508438215984	39.273508438215984	0.9973267885403558	18.22301138727032	18.3395075	18.3395075	0.14182849999999902
CL1632	1631	5	12074	58.911711114792105	58.13154804435946	59.524886877828045	4.204996378530422	3.4296198211860203	3.4302598000000004	3.363475	0.3246179600486701
CL1633	1632	5	12073	50.21121510809244	51.25379273674302	53.298611111111114	4.076221777588379	103.04152452348215	90.6305728	57.120270999999995	64.97378201742855
CL1634	1633	3	12060	58.58208955223882	57.52043151076222	58.95886590750639	2.473715283152554	3.7903273002487565	3.772401333333333	3.6987550000000002	0.14737404986933395
CL1635	1634	3	12058	61.29540553989053	63.79003457234054	65.48872180451127	3.2707846896559327	4.035430696881737	4.126906666666667	4.083848000000001	0.7261782489087801
CL1636	1635	2	12057	44.34768184457162	41.56296305298979	41.56296305298979	4.227036947010209	3.953410618478892	3.9939995	3.9939995	0.06161149999999992
CL1637	1636	5	12056	56.90112806901128	56.78045519611671	58.65470852017937	6.795429809006407	3.5371606715328463	3.5016592	3.606221	0.4729939626660788
CL1638	1637	3	12051	48.39432412247946	47.97973708593932	47.61006289308176	1.819403983872061	3.249712257986889	3.2255656666666668	3.121698	0.1640878483096444
CL1639	1638	3	12033	53.20368985290451	54.10570353372811	52.44328097731239	2.3689734532532367	3.635130580819413	3.429101333333333	3.3622120000000004	0.25488315258870203
CL1640	1639	2	12032	30.643284574468087	30.771141921493893	30.771141921493893	0.4997984403555655	5.101060823553857	5.2127725	5.2127725	0.43668450000000014
CL1641	1640	4	12020	61.688851913477535	61.75242342710902	61.32953000672838	1.2235382111136548	3.733634201747088	3.779846	3.8914215	0.35086093487662606
CL1642	1641	5	12007	51.25343549596069	51.93425275905408	52.44837758112094	2.337786780542965	4.027385763221454	4.1436724	4.275835	0.3787193846644768
CL1643	1642	2	12002	53.982669555074146	54.229884032084044	54.229884032084044	0.3220872940808341	3.842167854690885	3.005764	3.005764	1.0897219999999999
CL1644	1643	3	11998	55.05917652942157	53.6327348635888	55.56491523639044	3.8860388766962175	3.6577285639273214	3.412183666666666	3.4465470000000002	0.31234693318416873
CL1645	1644	5	11978	61.078644180998495	60.991575566904935	61.23884230457128	1.3001274097872983	4.36511876723994	4.3553846	3.956923	1.5687602625781416
CL1646	1645	2	11971	48.12463453345586	47.05853499971147	47.05853499971147	1.5505136093371377	4.327962489599866	3.967536	3.967536	0.524197
CL1647	1646	2	11968	48.337232620320854	48.72407875608579	48.72407875608579	0.9701958409125488	3.219930364973262	3.107589	3.107589	0.2817479999999999
CL1648	1647	4	11961	59.29270127915726	60.28377457695093	60.838553121511325	7.468750943979042	15.519695770838561	13.8896705	12.420800999999999	11.193752931189803
CL1649	1648	2	11955	43.09493935591804	43.208576803954465	43.208576803954465	0.18435821567047128	71.70229771978252	94.56530749999999	94.56530749999999	37.0915025
CL1650	1649	5	11942	61.79869368614973	61.42440107551917	61.324224908039945	2.133659638164809	4.327299930162451	4.0380848	4.505972	1.2334830361700806
CL1651	1650	2	11939	45.58170701063741	44.9898998371932	44.9898998371932	0.7214934998213423	2.9931976141217858	2.7687235	2.7687235	0.2736645
CL1652	1651	6	11935	60.10054461667365	59.49723524767104	59.19330793976576	2.464416152002788	16.432468803351487	22.872987500000004	4.187441000000001	34.92796835709097
CL1653	1652	4	11920	44.53859060402685	45.065290162570115	46.15686125210965	5.447841645647543	26.375564302936244	20.08084125	22.740289999999998	10.31450853606461
CL1654	1653	3	11912	58.277367360644725	58.16599985729143	58.079355951696385	0.2503303246433303	2.92448368384822	2.871320666666667	2.876043	0.15202302501996928
CL1655	1654	3	11911	59.43245739232642	59.36815950473241	58.12603648424543	3.6615896232577367	4.399701293006465	4.3543433333333335	4.008932	0.5069505297181921
CL1656	1655	5	11907	62.12312085327958	63.45114951600092	63.31187829139848	3.5263706576926697	4.024551286470143	4.024044399999998	3.920601	0.3152175765534657
CL1657	1656	3	11907	49.97060552616108	49.5651182953795	49.6969696969697	0.55826292385702	18.995377488284205	10.710149	4.637868	9.396537510672998
CL1658	1657	4	11905	64.81310373792525	64.83535006149279	63.98862444456761	2.3386585093918772	4.908679560940781	4.54438225	4.980509	1.1666394051609037
CL1659	1658	2	11901	37.845559196706155	37.68962518095813	37.68962518095813	0.2067250441592208	50.23912020771364	30.670231	30.670231	25.942893
CL1660	1659	4	11899	52.54223043953274	51.90569489050931	51.58209710628744	1.0060778034658906	3.2471230321035383	3.32588475	3.3393574999999998	0.5366133674072865
CL1661	1660	4	11897	46.465495503068	45.409079027456706	46.584667932219496	2.856312852673043	3.9787187018576113	3.50334525	3.3564160000000003	0.9611216744994814
CL1662	1661	3	11892	56.55903128153381	56.01615601225085	57.05185185185186	1.7783717130570451	19.05902679582913	22.327587000000005	22.671226	8.492396391914399
CL1663	1662	2	11892	38.06760847628658	38.466227096238	38.466227096238	0.6529438882179512	132.0140734651867	97.5931415	97.5931415	56.38205550000001
CL1664	1663	3	11891	62.551509545034065	61.890723790540626	62.991902258843595	1.639432152103241	3.763556965015558	3.6309176666666665	3.7232730000000003	0.6014778188763259
CL1665	1664	3	11885	51.69541438788389	52.38770636769903	51.470850418969505	1.582606935703632	3.5458932132940686	3.464155666666666	3.2874239999999997	0.26678724021003863
CL1666	1665	5	11884	53.85392123864018	52.729157584545796	56.099397590361455	7.207623949698616	4.7564696567654	4.6094608	5.239816	1.147291120912456
CL1667	1666	3	11884	51.98586334567486	51.99479840575751	51.93723363037582	0.34399719178144844	64.28838840710198	59.86999033333333	51.242038	21.195861821561717
CL1668	1667	4	11881	59.61619392307045	60.55149875112436	60.356986503558595	1.6501442337530663	4.222142512498948	4.2552125	4.2366484999999985	0.4605515920852407
CL1669	1668	3	11877	50.51780752715332	49.46509655909149	50.858875042101715	2.651423188304458	20.61328545903848	16.508159	11.414717999999999	7.83466449999926
CL1670	1669	5	11876	57.873021219265745	57.306516224027774	59.872611464968145	6.411370539390264	66.03800151911418	55.02396760000001	42.7922	27.009821563945074
CL1671	1670	2	11876	38.211519029976415	37.485812997742855	37.485812997742855	0.958035219965076	31.187048620747728	41.192142499999996	41.192142499999996	13.2081475
CL1672	1671	5	11866	51.567503792347885	51.01509942378289	51.68024439918533	1.866090370990271	3.372938797320074	3.1353762	3.0242720000000003	0.7579969021589469
CL1673	1672	4	11865	47.38305941845765	46.7159183078841	47.42219943550805	2.2454758946541835	3.93792825613148	3.87918375	3.8356334999999997	0.2292430344049464
CL1674	1673	6	11863	55.8796257270505	55.49972518207625	56.2933236535721	4.0699285055354615	6.676468867740032	6.885110833333332	6.740311500000001	2.2133967348499617
CL1675	1674	6	11857	60.07421776165978	60.27211765824789	59.457414552703426	3.7224534190953738	3.5128070679767234	3.454521833333333	3.5004340000000003	0.30089184470249797
CL1676	1675	2	11853	49.00868978317725	49.13491923088078	49.13491923088078	0.9333734520460552	2.90828580325656	2.868116	2.868116	0.297026
CL1677	1676	5	11850	54.59071729957807	54.5682020843051	54.034072645451616	0.7686110184063062	257.7608062221097	250.916568	256.84631	36.663524236525134
CL1678	1677	5	11842	56.502280020266845	56.798246724699275	56.122448979591844	2.269933769082938	3.3805348349940894	3.253422	3.311579	1.010256612833591
CL1679	1678	4	11832	59.043272481406355	59.243800243612434	59.46709503928296	2.1138471042797544	3.020402577332657	2.972961	2.9761154999999997	0.3757346875875315
CL1680	1679	6	11830	50.32967032967032	50.51800350297171	50.27901785714286	1.4255289755068348	3.74251323457312	3.7211201666666667	3.717942	0.9966486009726828
CL1681	1680	2	11815	39.212865002115954	39.04492086926946	39.04492086926946	0.30345005804883485	14.654119976385953	16.429714999999998	16.429714999999998	3.2082360000000003
CL1682	1681	2	11813	43.833065267078645	43.91406293469124	43.91406293469124	0.9854021086586968	3.5526764756624054	3.5554490000000003	3.5554490000000003	0.03373000000000004
CL1683	1682	3	11803	53.68126747437092	51.473774564665106	51.266069341643934	4.854713343594591	4.289785426417013	3.859763	3.841368	1.0392941603764867
CL1684	1683	4	11783	49.58839005346687	49.41566416209342	49.44254190075634	0.4846766255767258	3.978485024017653	3.5101945	2.9616855	1.4354564133589185
CL1685	1684	2	11780	49.02376910016978	49.53476802652162	49.53476802652162	1.5907947548690835	2.757792411544992	2.817976	2.817976	0.1873579999999999
CL1686	1685	3	11769	59.51227801852325	59.49553153754545	59.23707054652158	2.7682269668929216	3.3486690969496133	3.1720613333333336	3.4145489999999996	0.37872653781704935
CL1687	1686	5	11762	34.14385308620982	35.037033724391065	36.466492602262846	4.776085169748091	115.69895727699371	146.82995319999998	82.243243	155.17330464066617
CL1688	1687	3	11761	45.429810390272934	45.24074448424082	45.144448311869134	0.3750311003037449	4.121200034435848	3.800185666666666	3.3853519999999997	0.6364857406270432
CL1689	1688	4	11747	48.94866774495616	49.17732191176177	48.25447307241268	4.454150185888512	3.191597335660169	3.17086625	3.176457	0.2753371725243207
CL1690	1689	2	11734	41.69933526504175	42.66846769708772	42.66846769708772	1.2280561509316783	22.48454457797852	21.677467	21.677467	1.0227049999999984
CL1691	1690	3	11733	56.609562771669644	57.08045836626385	56.3437139561707	1.0701821472825743	3.864831233699821	3.9730416666666666	3.809093	0.6301041484417916
CL1692	1691	4	11727	51.61592905261362	53.028071192883615	52.710183305627254	3.880757408814667	6.3906399811545995	4.8157255	4.3096175	2.432033725814313
CL1693	1692	3	11727	42.54284983371706	42.57121863133681	42.19499200852424	0.6302951633863053	186.92780190381168	187.10564566666667	12.139841	254.37268136932497
CL1694	1693	5	11725	48.57142857142857	48.82701163003995	47.92875725435261	5.160920971878664	5.362111976289978	4.841854400000001	3.13786	2.693034088820979
CL1695	1694	3	11722	51.74884831939942	51.729491113354186	51.79282868525896	0.1390902837906456	3.6043561568844904	3.542410333333333	3.6178760000000003	0.27365722103431184
CL1696	1695	4	11714	62.87348471913949	63.21126818965236	63.413693978142774	1.321971081673596	4.111880605429399	3.99414975	3.9187905	0.7712669884911367
CL1697	1696	4	11698	49.06821678919474	49.42942132896866	48.880505956076526	1.6799661684347855	3.720720890750556	3.6557205	3.6871235	0.2696987978416848
CL1698	1697	4	11694	64.1611082606465	64.13495886057886	64.15272736651569	1.547425748617788	4.423179626218574	4.3264792499999984	4.5589225	0.5033163305891112
CL1699	1698	4	11694	45.96374208996066	45.52969799295832	46.10432652940239	2.234305218763527	27.40428254463827	26.28967725	29.4337245	6.4830544827504095
CL1700	1699	3	11690	53.327630453378966	53.22139247588797	53.361344537815135	0.8212694955514992	3.5668221266039346	3.4707796666666666	3.4291080000000003	0.21177913433312756
CL1701	1700	2	11675	49.66167023554603	49.49870426486251	49.49870426486251	0.3494265762589812	3.6388323987152034	3.503032	3.503032	0.29117899999999985
CL1702	1701	4	11666	49.86284930567461	49.93236671454849	50.02705519567362	1.0078647597826595	3.735045341248072	3.78293075	3.7885055	0.5270045018680461
CL1703	1702	6	11665	51.36733819117017	51.87199788363742	51.862823167170994	1.000727226639579	4.055411833347621	3.552946166666667	3.493428	0.8915042218251907
CL1704	1703	2	11664	56.524348422496566	57.273109719592895	57.273109719592895	1.4570490105658287	3.213171576388889	3.5690995	3.5690995	0.6926165
CL1705	1704	3	11649	44.30423212292901	43.823889083978045	43.765173250937984	1.0469066979727502	52.15232913142759	47.26490933333334	45.867338000000004	10.832843042446594
CL1706	1705	3	11648	58.112980769230774	57.79461381334954	56.682267290691634	2.2602744684247194	4.430194537688874	4.611509666666667	4.538682	0.5730622834179739
CL1707	1706	3	11641	58.15651576325058	58.0038901780686	58.62656952410479	0.9968420881793324	4.070669688171121	4.052828	4.06338	0.2393449290097174
CL1708	1707	2	11639	59.32640261190824	56.98254820208246	56.98254820208246	3.1095544826128148	5.068431304063923	4.512112	4.512112	0.7380599999999999
CL1709	1708	4	11636	37.76211756617394	40.56224767385522	42.06000722237125	4.500504238306563	114.77596201418012	168.44301049999999	100.7957935	147.1632590074219
CL1710	1709	4	11635	52.04984959174903	51.45213430217903	51.15482066022646	3.5755528316566747	3.5894307400945418	3.389446	3.7899865	0.7115749660116634
CL1711	1710	5	11634	51.340897369778226	51.652233858271686	52.264808362369344	2.189033637443678	529.4575725079078	568.0636047999999	530.278017	201.50934721597312
CL1712	1711	3	11631	40.409251139196975	40.950144782685854	40.44728434504793	1.284326397989096	24.552217204969484	25.873441666666665	24.424568	3.2260498857416247
CL1713	1712	6	11630	46.6981943250215	46.69680008846832	46.93625968489876	1.146919207003573	101.71398127317282	100.739349	86.11941150000001	40.313408138154244
CL1714	1713	2	11622	56.60815694372743	56.67860000103229	56.67860000103229	0.09332982352910693	4.18035658673206	3.6565714999999996	3.6565714999999996	0.6939615000000001
CL1715	1714	4	11620	61.12736660929432	61.821212117340345	61.91087348769989	2.73150549892283	2.921392937951807	2.60075175	2.5812095	0.5600972641472082
CL1716	1715	2	11619	62.73345382563043	63.57993276173043	63.57993276173043	2.0358598134021584	4.238180620707462	4.323133500000001	4.323133500000001	0.2043195
CL1717	1716	5	11600	53.68103448275862	53.83247408224802	54.82883384358474	1.7137592744271362	4.180734291551723	4.1197354000000015	3.7818690000000004	0.6851948185415884
CL1718	1717	3	11594	49.206486113506976	51.260649980420226	50.548168882668534	3.811837648974968	78.15438054674831	101.021249	115.134879	45.42912919200175
CL1719	1718	2	11588	56.57576803589921	50.216195237212936	50.216195237212936	10.911271778379682	60.53694862435278	44.6652465	44.6652465	27.231460499999997
CL1720	1719	3	11578	47.40024183796856	46.81510085606804	47.12115153938424	1.2927825973191858	4.2942311122819135	4.156341666666667	3.828172	0.497668452952588
CL1721	1720	5	11577	54.04681696467133	54.4965300281747	54.80225988700565	1.9135913820976267	3.0668088284529667	3.0539180000000004	2.895896	0.6252895646297002
CL1722	1721	2	11573	42.979348483539276	43.36093932748885	43.36093932748885	1.6277739907955784	17.60413170664478	18.4968755	18.4968755	3.8082285
CL1723	1722	4	11570	61.65946413137424	61.81648345353244	62.12008683949732	1.4453773939042864	3.6900107886776157	3.66568325	3.8794480000000005	0.4557901986097194
CL1724	1723	3	11570	40.605012964563535	42.75047829242475	39.940693430656935	4.270211823595167	12.419629586171133	14.208272666666666	12.57275	3.4446680114868666
CL1725	1724	2	11563	47.18498659517426	42.94519105395594	42.94519105395594	6.663688438644482	66.03515435207126	103.2499465	103.2499465	58.49050450000001
CL1726	1725	2	11543	43.28164255392878	47.07498886446257	47.07498886446257	4.971794761268446	4.027310171965694	4.2396604999999985	4.2396604999999985	0.27831949999999983
CL1727	1726	3	11538	41.09897729242503	40.537645909024036	41.30434782608695	3.3394331514111286	37.330435988299534	32.932345	29.975806	4.431207674238932
CL1728	1727	2	11529	64.37678896695289	64.36434721759582	64.36434721759582	0.03052584131470581	4.576866659640906	4.5220614999999995	4.5220614999999995	0.1344645
CL1729	1728	5	11527	59.5558254532836	59.53952399360135	59.49019607843139	3.913613250544328	6.952816483473582	6.7118522	6.342366	0.9641311408040713
CL1730	1729	3	11525	59.6529284164859	59.06231279130296	60.19021739130435	2.260650787486915	5.719397785856832	5.595973999999999	5.824598	0.6919009364742904
CL1731	1730	4	11514	45.648775403856185	45.57206111770683	46.09059968019439	1.1375884843543351	4.0767740603612985	3.844171	4.0916455	0.7620931337313702
CL1732	1731	3	11504	40.2990264255911	38.29211636022756	43.548387096774185	7.663561456232777	151.63296777494784	128.08557133333332	185.708345	88.21899823166069
CL1733	1732	5	11499	54.70910513957735	55.410414263833644	56.619458128078826	3.9598905092014336	2.826386254282981	2.6282428	2.77037	0.5158630029197286
CL1734	1733	2	11495	66.79425837320574	66.72003140870257	66.72003140870257	0.18111631436295286	7.054805914397564	7.3360270000000005	7.3360270000000005	0.6861890000000002
CL1735	1734	4	11494	38.246041412911076	38.552266665039824	38.126408115564864	1.8713318895914224	54.87387280363667	121.9888945	29.7988055	170.83282867821796
CL1736	1735	3	11489	54.84376359996519	55.69151379819078	56.30165289256198	1.5284793269133856	27.18337867142484	28.092014	27.060089	1.7182196186846042
CL1737	1736	3	11485	44.431867653461026	44.354120148447606	45.368916797488225	1.6826174185360057	76.40352430422291	65.86052166666667	71.228868	19.708422495116658
CL1738	1737	3	11479	59.430263960275276	63.122742831296854	64.62845010615712	4.749990813759744	41.850992158724615	55.21058933333334	38.735213	34.99723198402525
CL1739	1738	3	11472	48.14330543933055	48.674963547714434	48.928238583410995	0.8395603296769824	3.37834411305788	3.2806866666666665	3.358696	0.2404762048191508
CL1740	1739	4	11468	37.79211719567492	39.69820809148479	40.02318768911013	4.6253054202454456	34.93206168896057	25.72903575	20.85048	12.562473526945169
CL1741	1740	4	11455	48.6687036228721	48.14318688499893	49.07404327890904	2.2567038080042296	3.8591945371453513	3.6888339999999995	3.6923644999999996	0.5515648600450358
CL1742	1741	5	11452	62.46943765281175	62.42860726843603	62.763571108120225	2.7087139892225154	3.6696505028815936	3.6748772000000005	3.73145	0.4337593922678332
CL1743	1742	4	11446	51.36292154464442	51.481212579471595	51.567697547200886	0.9874829285388871	3.980951595753976	3.8154582500000007	3.6111185	0.7524598134207485
CL1744	1743	2	11446	38.764633933251794	38.180247825769584	38.180247825769584	0.7895282561663564	58.29607223755024	44.8511485	44.8511485	18.1646125
CL1745	1744	4	11434	51.54801469302082	56.31158459080442	59.15996395848617	9.934921371455696	25.090906385254502	28.40336975	26.368199	20.2910178515234
CL1746	1745	6	11433	51.79742849645761	51.91451031002764	52.12848089110813	1.2243411078629023	548.5049174676813	509.947325	508.92349450000006	320.84301964994467
CL1747	1746	2	11431	38.2381243985653	37.62343542917571	37.62343542917571	1.5915084052304458	13.499729731082144	18.5361685	18.5361685	13.0399845
CL1748	1747	3	11427	54.966307867331764	53.79451842750467	54.20289855072464	2.0598611839209324	3.6782190719348913	3.2842113333333334	3.117471	0.5858599195611713
CL1749	1748	4	11421	64.60029769722439	64.31801002815288	64.44723244214262	1.4162860717797991	4.061490601348393	4.173297499999999	4.394223500000002	0.7979566496522542
CL1750	1749	2	11409	45.621877465159095	45.924000959568474	45.924000959568474	1.7435138835188797	701.3775473607678	697.1101484999998	697.1101484999998	24.626582499999987
CL1751	1750	4	11403	61.176883276330784	61.32673234887567	63.19796989082342	3.875386864130635	4.4795014782951865	4.458018	4.240981	0.6879925247875152
CL1752	1751	5	11401	53.60056135426717	55.52956540180367	54.10269984118581	3.7014729340477075	23.63550777966845	29.6505752	33.53668	18.213237831079105
CL1753	1752	5	11398	61.81786278294437	61.733034300963524	63.4765625	4.94758457797768	4.501124412703983	4.301049400000001	4.330762	1.2384293913853304
CL1754	1753	4	11398	62.563607650465	62.84943583672046	62.76124804974204	0.7326735726496026	5.478558420336901	5.068062749999998	4.7322570000000015	0.922419970037069
CL1755	1754	2	11388	50.51808921671935	50.50773555439875	50.50773555439875	0.854402221065417	4.051421174130664	4.0539795	4.0539795	0.21111750000000007
CL1756	1755	4	11387	49.87266180732414	49.80311738798365	49.68466598333715	0.9557503094604414	3.212130731360324	3.18250575	3.29115	0.3505305390628432
CL1757	1756	4	11377	62.468137470334895	62.96344117912796	63.149169490681494	1.6589849182292846	5.112933291816823	4.9173927499999985	5.332291000000001	1.2487897273182895
CL1758	1757	4	11364	53.01830341429074	53.595302061025095	53.213074793350366	2.5967321548295885	195.3901610471665	175.404864	198.362098	93.62646200826849
CL1759	1758	4	11358	54.36696601514351	55.691934198068026	55.28624098425793	3.1301365277545554	5.246352546751188	6.44291825	5.1089400000000005	3.6407402326514844
CL1760	1759	3	11357	60.49132693493	60.313799369706885	60.099009900990104	0.9423013838986868	4.215520586598573	4.932608666666667	4.075758	1.3678666404600832
CL1761	1760	4	11356	61.85276505811906	61.73808873176439	61.68723441310847	1.0410514916035516	4.11311024462839	4.04295475	3.8527085	0.8038140952590888
CL1762	1761	5	11355	47.547335975341255	47.7650683899512	49.457908163265316	7.628556059820676	119.07961943566713	109.5543582	133.07081100000002	46.831747701228075
CL1763	1762	3	11347	51.185335330924474	50.89794285725181	50.7079646017699	1.4398999269237331	6.035773542698512	5.999578	5.823181	0.3779857662461203
CL1764	1763	5	11344	50.09696755994359	50.39450997158806	51.74763684326226	3.3457476038303526	3.652525406999295	3.6237517999999995	3.793085	0.5989379289774193
CL1765	1764	5	11341	45.01366722511242	45.20046483747979	47.92626728110599	4.119850652849531	57.323505991623314	52.737312800000005	5.0	69.34066133001608
CL1766	1765	4	11340	59.00352733686068	58.748078184862955	58.66274068852457	1.1205804016099783	3.591387798765433	3.55466425	3.4620575	0.2157128246829277
CL1767	1766	4	11339	53.0470059088103	52.66813288783053	52.155984117980715	2.071562525698471	4.304062037040303	4.13016825	4.215094000000001	0.7123207636863378
CL1768	1767	5	11320	47.4469964664311	48.17398296652785	46.62203286670725	4.4140865282243515	72.89129690521203	68.47371820000001	67.731511	16.764084205830315
CL1769	1768	2	11320	42.57950530035336	43.894070403986845	43.894070403986845	2.383991825237267	10.358779150618373	8.822749499999999	8.822749499999999	2.7856225
CL1770	1769	3	11317	53.48590615887603	51.85514994628935	51.49525893508388	1.7978547905621312	15.434723798886633	16.01513333333333	14.653820000000001	9.632091582567007
CL1771	1770	4	11309	47.95295782120435	47.872058432464215	47.933292423669215	3.5269567014147896	3.1603498170483686	3.1204754999999995	3.1851425	0.2535199738329309
CL1772	1771	6	11299	59.031772723249844	59.08923184551664	58.007561459254134	3.1065841262286207	2.5211658852110808	2.4389451666666666	2.292811	0.5583780142843546
CL1773	1772	3	11297	46.52562627246171	48.9391746034026	43.522438611346324	9.154069536970793	132.0523047193945	101.67150433333336	122.086607	74.17284766332581
CL1774	1773	5	11292	51.461211477151956	52.16282592720648	54.17218543046358	4.3412910585154405	3.627391654091392	3.742636800000001	3.8115940000000004	0.9746130599936365
CL1775	1774	5	11288	57.54783841247343	57.2343928054536	56.947162426614476	1.1101141124969478	22.087829905917786	19.9948244	22.803363	5.974777419916313
CL1776	1775	5	11283	45.847735531330315	44.501026550824896	44.15760869565217	3.134387412069727	594.7870523136578	503.52889520000014	390.250698	201.0964356147216
CL1777	1776	5	11281	49.42824217711196	49.18515713490292	48.682894298099356	1.090388236540769	3.8366760567325584	3.4509544000000005	3.532977	0.7432421936264382
CL1778	1777	3	11266	52.485354162968214	52.15394693480999	52.24252491694352	0.5663181819603081	4.97011191319013	4.4168606666666665	4.412698000000001	0.7492475393109782
CL1779	1778	5	11257	47.03739895176335	47.42515970892786	47.475333720255364	3.014579067983259	14.143278656036241	16.0455298	13.100645	7.575198433888511
CL1780	1779	2	11252	30.82118734447209	30.93890389871509	30.93890389871509	0.6331485030316362	43.23121299608959	52.01319650000001	52.01319650000001	47.234645500000006
CL1781	1780	4	11245	57.06536238328146	57.202331105925175	57.13583868718874	0.3442193273937861	3.595898215384614	3.67981075	3.69055	0.4295092340563674
CL1782	1781	3	11243	49.33736547184915	48.05301033328103	49.791564492398244	2.750248815697608	6.6588292555367765	12.465655333333332	4.484991	11.8835600493456
CL1783	1782	4	11233	46.33668654856227	45.885628585739724	46.799863331569604	3.0547626704967166	75.4341261113683	70.23990024999999	76.772613	35.44256693150435
CL1784	1783	3	11232	48.49537037037037	48.89163860477785	48.55699855699856	0.9034250465713408	3.203178029469373	3.142618	3.172592	0.12279068207590785
CL1785	1784	4	11227	49.897568361984504	49.441072930276995	49.14504925830911	1.992345651756392	3.5358381359223308	3.5321985	3.5205265	0.5030132799263356
CL1786	1785	3	11219	46.136019253052865	46.07496475690225	46.573323507737655	0.8942262493500863	4.091087194848025	4.354669333333333	4.236916000000001	0.8834585270999175
CL1787	1786	6	11217	63.011500401176775	62.72406868130176	63.36861928483553	3.1888610432320106	6.161670027547473	5.859158000000001	6.054579	1.4393775149243049
CL1788	1787	3	11209	55.25916674101169	52.5330306689039	52.00769415724935	5.018101915947467	2.9383854849674367	2.7342176666666664	2.928014	0.3766549337402723
CL1789	1788	2	11201	55.352200696366396	56.25055833537034	56.25055833537034	1.517494181041041	524.0425711001699	333.47412149999997	333.47412149999997	321.9057765
CL1790	1789	5	11199	61.943030627734615	62.74660866343315	61.8277898663351	2.052080841328091	4.919181753906599	4.494811199999999	4.396603	1.225044953511568
CL1791	1790	3	11195	37.55247878517195	37.06957297384559	36.2144420131291	1.5015458877407384	27.902199598392144	30.399571	32.72724	14.298232448840732
CL1792	1791	3	11191	41.53337503350907	42.40558971039514	43.13543599257885	1.037722314398841	3.6746428076132607	4.491412	4.165192	1.3897327978341736
CL1793	1792	4	11184	52.04756795422031	52.56019308330014	52.878404808711174	1.356041313139315	4.319567054542203	4.1149217500000015	4.247123500000002	0.4642951248696108
CL1794	1793	2	11175	53.70917225950783	53.16797217772282	53.16797217772282	4.3730375371999415	3.4344176902013417	3.4558419999999996	3.4558419999999996	0.17311400000000002
CL1795	1794	6	11163	53.56982889904148	53.19209079304556	53.956696735926	2.489140267670113	3.4951261233539364	3.502986	3.6039195	0.5784161226458566
CL1796	1795	3	11162	54.30926357283641	54.890720682224895	59.42028985507246	7.727060971853037	3.894222538613152	3.914279666666667	4.447697	0.7622695355674541
CL1797	1796	5	11156	62.477590534241656	62.134447482840386	62.340093603744144	2.3853608351979845	2.656534828522768	2.5386964	2.651467	0.4168364493906932
CL1798	1797	2	11154	44.943518020441104	45.877824573606176	45.877824573606176	1.2444775846672087	4.778822587950511	3.917938	3.917938	1.1466810000000005
CL1799	1798	4	11148	64.7918909221385	65.01126874851984	65.27407213302206	1.1283767484522718	3.098042079117331	3.07776775	3.0238965	0.29235461777383903
CL1800	1799	5	11137	63.320463320463325	62.83488121726507	63.806264806528034	2.9892342075795586	2.707582253389602	2.4798072	2.46087	0.6784062978650477
CL1801	1800	5	11129	47.64129751100728	47.60716954367477	48.74074074074074	3.5428129608810712	4.870801951657833	4.7644388	4.554908	0.8390955921243779
CL1802	1801	2	11129	50.60652349716956	51.20103245673727	51.20103245673727	0.8934895625967769	5.589029937640399	5.2239140000000015	5.2239140000000015	0.548734
CL1803	1802	2	11125	63.01123595505618	61.45298611102921	61.45298611102921	2.189105886450303	3.7097188082696624	3.513297	3.513297	0.27594300000000005
CL1804	1803	5	11123	54.76939674548233	54.2649449841357	53.72993389990557	1.2297351781882888	3.282716140969163	3.1267297999999997	3.233237	0.656563743328978
CL1805	1804	2	11118	39.01780895844576	38.83353246825419	38.83353246825419	0.5579482619689351	959.4759075825688	738.1733145	738.1733145	670.0550735
CL1806	1805	3	11117	50.07645947647747	50.057571657150326	50.08991561765113	1.4490186565817504	54.2401636539534	53.00489633333334	53.400641	2.3059500220777167
CL1807	1806	3	11117	61.950166411801746	62.02044883860635	61.788617886178855	0.6669824577879322	3.649950821444635	3.592912	3.6319589999999997	0.10574143413377128
CL1808	1807	5	11101	61.68813620394559	62.52399749284873	62.54295532646048	3.0511599389592816	4.3993646898477605	4.407695400000001	4.378118	0.6153537137535127
CL1809	1808	4	11101	43.122241239527966	46.05755869680874	41.18246811910628	9.898784168797787	388.02908998270436	238.23330925	207.2527825	218.368593554338
CL1810	1809	2	11084	42.41248646697943	39.46887779560867	39.46887779560867	8.691251601884254	24.78428419496571	19.3033475	19.3033475	16.1829255
CL1811	1810	2	11082	47.70799494676052	45.95930528860155	45.95930528860155	2.569474780126974	4.392604761234433	3.629846	3.629846	1.120776
CL1812	1811	3	11075	52.830699774266364	54.354711300801114	56.740133264992316	4.207192221983707	4.401286424379233	4.569645666666666	4.850039	0.4707390384224458
CL1813	1812	4	11074	47.787610619469035	51.12647855786581	56.946389227657576	13.780989133079819	3.548202693335741	4.036059249999999	3.535639	1.7569244823141057
CL1814	1813	4	11068	61.97144922298519	61.12347043656239	60.80376560769961	3.6957893464973934	5.162141921575714	5.0065015	5.150071499999999	0.4839704545933047
CL1815	1814	2	11066	47.686607626965476	48.850810029924666	48.850810029924666	1.5491899700753289	3.673850812127237	3.3592605000000004	3.3592605000000004	0.41862150000000004
CL1816	1815	4	11059	61.57880459354372	61.011172275456325	61.91335067264957	3.188082916194588	60.57109081951352	53.424981	65.88475700000001	28.133866294641447
CL1817	1816	2	11051	57.27988417337797	57.46411453714825	57.46411453714825	0.5218994488657422	3.1642269170210846	3.2858355	3.2858355	0.3445004999999999
CL1818	1817	7	11041	59.95833710714609	60.03939299796112	58.98100172711572	2.7768907197595243	3.302635840956435	3.3405215714285714	2.720749	1.21873776052273
CL1819	1818	2	11022	49.81854472872436	49.426032564139454	49.426032564139454	0.8536442537598674	2.9549320576120484	3.0184915	3.0184915	0.13823049999999992
CL1820	1819	5	11006	54.47937488642559	54.724883954167815	55.09904622157006	2.0768597254487347	2.76619728684354	2.7467767999999997	2.645307	0.2102876304183391
CL1821	1820	2	10999	44.23129375397763	39.237195665201895	39.237195665201895	6.638076722470615	470.37204792162936	269.2799725	269.2799725	267.2884275
CL1822	1821	4	10989	44.81754481754482	44.07130317628182	45.937265405402	4.076015241801924	3.4185061881881884	3.38509475	3.3914225	0.7758004063276761
CL1823	1822	3	10987	63.82998088650223	62.952440140392724	63.57535082367297	2.1896383925950804	3.4304724148539187	3.440426	3.4574160000000003	0.15858578464246606
CL1824	1823	4	10983	54.25657834835654	53.962648986750494	53.896894627605235	1.217752055938052	3.971396285441136	3.987057	3.829876	0.7259719625946307
CL1825	1824	5	10978	60.31153215521954	60.58244685607967	60.03249390739237	2.6250830474284084	4.331812443978866	4.188972	4.461093	0.7180197909300272
CL1826	1825	2	10976	52.997448979591844	54.11419301664671	54.11419301664671	2.170985219751035	26.531226678207	27.760208000000002	27.760208000000002	2.389178
CL1827	1826	2	10967	47.086714689523106	47.59833955553813	47.59833955553813	0.7456464990812819	2.9652655403483177	3.107118	3.107118	0.20673700000000014
CL1828	1827	3	10954	51.579331750958545	51.15595317286158	50.789229340761366	1.4882912493433902	3.476867499087092	3.380380333333333	3.225806	0.3769974955923301
CL1829	1828	4	10952	52.976625273922565	52.99927041356771	53.22853136939432	1.6077077672445892	2.9765692947406865	3.0015845000000003	2.9704669999999997	0.31002742359709085
CL1830	1829	3	10938	52.19418540866703	51.87439810746097	52.12121212121213	0.6721030108600606	3.0173079703784973	3.089147333333333	2.95047	0.3474346979854231
CL1831	1830	3	10936	49.71653255303585	47.319964625142994	51.12179487179486	7.292850111937486	3.594568610826628	3.290715	3.250513	0.6738339865787911
CL1832	1831	4	10923	47.45948915133204	47.43913019240779	48.21434410227707	1.5412988330370812	3.4424795109402178	3.39018825	3.4029565	0.4751290456220158
CL1833	1832	4	10917	37.26298433635614	37.94530905448325	38.34969503553931	6.562702298867872	164.26856498021434	233.51609225	231.51039100000003	212.82116115714803
CL1834	1833	4	10899	63.106707037342865	64.15277294666251	62.7829183411911	3.611367033514188	5.347138730066979	5.4445235	5.3815645	0.9118579070980574
CL1835	1834	5	10894	48.11823021846889	48.08472648396153	47.96918767507002	0.5947693757046564	4.045188096842299	4.0402618000000015	3.915743	0.4133217771061188
CL1836	1835	5	10889	47.837266966663606	48.5058224289373	46.99415204678362	4.5186005237926326	6.0671729711635605	7.3850662	3.6264529999999997	6.835093637236973
CL1837	1836	3	10889	52.20865093213335	52.19854998751915	52.19123505976096	0.024807264799553804	3.4144403203232616	3.212253333333333	3.083333	0.4062391304066552
CL1838	1837	4	10887	52.016166069624326	52.22104938595808	51.85957707967244	1.5489972718674296	30.77315295820703	30.84144675	30.104290000000002	1.987635007540416
CL1839	1838	1	10882	40.571586105495314	40.571586105495314	40.571586105495314	0.0	3.279087	3.279087	3.279087	0.0
CL1840	1839	4	10859	48.70614237038403	48.572310343618355	48.986179140986025	1.108684110667432	24.647836591767195	22.450244	22.4592835	5.9815333991702735
CL1841	1840	2	10854	55.905656900681784	56.021132729301776	56.021132729301776	0.5835077485295947	19.435264206191267	19.240607	19.240607	0.9836170000000006
CL1842	1841	5	10851	49.46087918164225	49.87926137792439	49.77578475336322	1.8142804232307541	280.27704221334443	316.96126739999994	170.054705	223.59059016541974
CL1843	1842	3	10850	47.548387096774185	47.4872880096146	48.83169039795546	2.391417916940094	20.95389894313364	20.228434666666672	21.432188	2.2331031217738744
CL1844	1843	5	10841	58.85065953325339	59.222361309073584	58.77680698967434	1.899789470330396	3.347750464901761	3.203161	3.32838	0.4935071599618389
CL1845	1844	2	10834	38.342255861177776	39.78134616423465	39.78134616423465	3.888055945964641	17.610456760014767	15.6204095	15.6204095	5.3766015000000005
CL1846	1845	2	10822	41.56348179634079	41.23671624835626	41.23671624835626	0.6285561251845913	3.7242392666789863	3.4894580000000004	3.4894580000000004	0.4516179999999999
CL1847	1846	7	10818	50.34202255500092	51.49095492148344	51.368256450351836	4.704386832083387	4.058536199852099	4.326098285714286	3.9326769999999995	1.313932279091682
CL1848	1847	3	10818	57.404326123128115	57.04458986699183	56.40900195694717	3.6076430463132634	3.770897470142355	3.538645666666667	3.3371169999999997	0.8438299754908503
CL1849	1848	3	10817	54.65471017842285	54.23163151461174	53.749438706780424	1.1008590227116943	3.8094690306924286	3.8471370000000005	3.698984	0.2335664066441636
CL1850	1849	3	10811	55.85052261585422	55.80939606961471	56.021897810218974	1.0297644296321276	3.4940825217833686	3.505611333333334	3.4716739999999997	0.19479669919574
CL1851	1850	2	10798	48.583070939062786	48.161284898479	48.161284898479	1.2750407800178785	3.5498603540470457	3.4212275	3.4212275	0.3888514999999999
CL1852	1851	2	10790	61.51992585727525	62.987135741533564	62.987135741533564	2.0990711550181733	31.071184167562567	31.631772500000004	31.631772500000004	0.8020085000000012
CL1853	1852	3	10789	47.909908239873936	49.223416635747654	48.12880765883377	2.301687343901455	4.0880823687088705	4.023617333333333	4.092982	0.12083737766473104
CL1854	1853	3	10780	49.18367346938776	48.93348365434741	50.66249813905017	4.3575419092374	4.848960797217068	5.57266	4.364333	1.8635199218892189
CL1855	1854	3	10779	50.47778087021059	50.70167099019577	51.94704049844236	1.9305534121582824	3.7698660052880606	3.756212	3.6328699999999996	0.2677943319377765
CL1856	1855	4	10772	59.73821017452655	59.053949151983716	59.38730705820439	3.258061435422368	10.94944402070182	9.43610475	9.169184	5.494907777446513
CL1857	1856	4	10752	62.3046875	62.63062107456825	61.852104123146106	3.7658859470125736	5.33049635453869	4.8872765	4.489523	1.1496622279675233
CL1858	1857	5	10737	53.05951383067896	53.6485585379768	52.98791018998273	3.3275080585302503	2.8365574552482067	2.7446474000000003	2.446366	0.6960703085187875
CL1859	1858	4	10731	52.1293448886404	51.60491098576416	52.49186124398721	2.5190822748724577	2.9736458820240426	2.9311245	2.9337880000000003	0.1377705112143015
CL1860	1859	3	10723	49.967359880630426	50.56893868447224	50.0964743027539	1.6069212843624432	3.9631845624358846	4.121455	4.133369	0.310557716957734
CL1861	1860	2	10721	59.57466654230016	59.49336914902114	59.49336914902114	1.082719693595557	3.5354289174517297	3.5109265	3.5109265	0.3263235
CL1862	1861	6	10709	63.89952376505743	63.97998888174758	63.661009161847794	3.1763606967103994	2.4747000762909703	2.5152	2.6497040000000003	0.3219636288542542
CL1863	1862	2	10707	59.017465209675905	60.73596421505322	60.73596421505322	2.3106830152674758	3.7759870396002615	3.4385115	3.4385115	0.4537674999999999
CL1864	1863	4	10702	59.72715380302747	60.97979360840184	61.1220292592664	2.0482537735497592	18.997169292375254	30.175036750000004	36.605228499999996	15.94685017720544
CL1865	1864	4	10699	57.06140760818768	56.08930649968885	56.69405807146178	2.5926788596592183	4.190043817833443	4.0790239999999995	4.090541	0.8212116731385399
CL1866	1865	4	10694	57.92968019450159	58.082778533003456	58.11672223273878	1.4345870623673411	3.354439735833177	3.2720462500000003	3.2365465	0.6521770526365427
CL1867	1866	4	10692	50.635989524878404	52.79927926810009	52.696993244320204	3.990468629992749	9.87673333174336	9.15176625	4.3507475	8.828922211009008
CL1868	1867	5	10690	44.022450888681014	46.10161431052339	46.87701223438506	4.180336054778425	19.165078383816653	23.021928000000006	21.353464000000002	9.062869100516393
CL1869	1868	5	10687	42.9400205857584	47.12130019013536	49.19292851652575	4.985651406783749	20.68829632796856	19.0617174	15.745289999999999	6.43055834716251
CL1870	1869	4	10684	52.330587794833406	52.1105616404162	52.77152786725888	1.7024200477652425	3.6515489585361287	3.66454325	3.7093010000000004	0.2424726678930793
CL1871	1870	4	10682	55.38288709979405	55.35341127838636	55.332132189572974	1.5076137579059932	3.600227920426886	3.48620925	3.3644	0.3427028525803184
CL1872	1871	3	10678	61.472185802584754	61.15572676778512	61.843640606767785	1.4906806509411863	3.603081201910471	3.6268019999999996	3.56104	0.31289580579590154
CL1873	1872	3	10671	62.299690750632564	62.24786019880975	62.353801169590646	0.940078954556362	4.516721385812015	4.365781666666667	4.360425	0.4582890559696527
CL1874	1873	3	10669	50.67953885087637	51.67265280280738	52.407932011331454	1.2596963840024655	4.3645189775986495	3.7981193333333336	3.296062	0.7245902091754269
CL1875	1874	4	10668	53.0652418447694	52.047979914569524	50.95138888888889	2.2718780992845686	28.44579863179602	26.831061	26.090436500000006	3.150179950105469
CL1876	1875	3	10667	64.55423268022874	64.992194886275	65.4460518384569	3.0485862794830205	3.6627863575513264	3.535221	3.6790870000000004	0.3279107609609663
CL1877	1876	6	10664	61.21530382595649	61.34806398774519	61.4735921724719	2.5198815823404352	2.5883795685483872	2.5231665	2.431274	0.3070830793345399
CL1878	1877	4	10657	49.36661349347847	49.17831401220313	48.77322666331358	2.0355912154827043	12.067489975696724	13.2796715	15.496272	4.8484741175851145
CL1879	1878	4	10655	50.35194744251525	51.64632907089646	49.29053098684413	6.534282189406292	23.604875595682774	23.1022495	13.533379	24.20229598950653
CL1880	1879	4	10655	55.06335053965274	55.25680300245199	55.18796738585287	1.4965248372398825	3.4977803021116847	3.43380875	3.3693565000000003	0.4470704599587044
CL1881	1880	3	10653	38.34600581995682	38.58615713667772	38.53524982888433	2.201004303621417	56.39908914615602	53.866106	42.810905	16.014481886674886
CL1882	1881	4	10650	58.300469483568065	57.54561784922361	57.46185576714021	4.219730253028306	4.107119853051643	4.01977375	3.747931	0.6605451337181187
CL1883	1882	2	10644	43.81811349116873	45.236624789781494	45.236624789781494	1.876539182504878	82.44763964430666	76.20223299999999	76.20223299999999	8.262007000000004
CL1884	1883	2	10636	60.42685220007522	60.372105177444105	60.372105177444105	0.07059763975565048	3.5846504151936815	3.2487220000000003	3.2487220000000003	0.4331879999999999
CL1885	1884	4	10632	57.35515425131678	56.80523182536988	56.82332722414696	1.3299373094110345	3.3623254052859286	2.90263575	2.7281560000000002	0.7489520855209548
CL1886	1885	4	10626	46.828533785055534	46.73397610546955	46.353055843034504	1.62587122482182	3.2706052513645774	3.2067697500000003	3.127888	0.4692910420727071
CL1887	1886	2	10619	62.70835295225539	61.78304813592479	61.78304813592479	1.291680274038999	6.165147644787644	5.1860915	5.1860915	1.3667145000000005
CL1888	1887	2	10616	46.10964581763376	46.59768802860012	46.59768802860012	1.0382877979196117	5.671755273643558	5.6340325	5.6340325	0.08025350000000042
CL1889	1888	4	10605	56.97312588401697	56.354861699988184	58.710476196737396	9.488169369176996	13.321068017538895	10.49560075	6.139224499999999	8.337051432806486
CL1890	1889	3	10599	59.732050193414466	59.06982405066314	59.24481474915795	3.2976730754149064	3.579357148032833	3.555242	3.505376	0.21356502865403784
CL1891	1890	5	10592	46.374622356495465	46.546890098228715	46.304275770633076	6.130387368639426	167.55774190341768	186.1855778	153.232774	68.3170791317618
CL1892	1891	2	10590	30.29272898961284	30.754103325056022	30.754103325056022	0.7195808854702914	7.060257626062323	6.845307000000001	6.845307000000001	0.33524699999999985
CL1893	1892	2	10580	40.567107750472594	40.51174445519945	40.51174445519945	0.494715932423805	3.278276381096408	3.247252	3.247252	0.27722800000000003
CL1894	1893	4	10577	42.45060035927011	42.3744505144286	42.17461306637385	0.9923702639390104	3.450476316157701	3.006933	2.686934	0.7010613680966167
CL1895	1894	2	10573	52.65298401588953	52.40404751449073	52.40404751449073	0.8598515613490854	4.214080283552445	4.118623	4.118623	0.3297190000000001
CL1896	1895	4	10570	60.59602649006622	60.098081383651476	61.23415249617201	4.733099312589254	4.613122912109745	4.1422555	4.1994305	0.9438448474003818
CL1897	1896	4	10563	62.03730000946701	61.745380756132214	61.79654309748628	0.5548508516706311	4.063927752532425	4.25520675	4.6371805	1.1556433911112842
CL1898	1897	3	10562	46.37379284226472	46.92303265572129	46.6728855721393	1.0470768642144297	4.886309200814238	4.826219333333333	4.31166	1.1674829354859488
CL1899	1898	5	10561	64.1511220528359	64.07232957081075	63.75098502758079	2.118482901645299	4.765726256604489	4.750283400000002	4.546376	0.6349954434912425
CL1900	1899	4	10561	48.70750875864028	48.74460302675738	48.78191019056756	0.6267883917634195	3.3803158634598995	3.35868325	3.267191	0.35814226311158465
CL1901	1900	4	10547	56.98302834929364	56.459649416414145	57.21523099578036	1.97727889353741	4.3392848447899866	4.44031575	4.3288185000000015	0.3425263428988893
CL1902	1901	2	10541	59.89944028080828	54.01722861855753	54.01722861855753	9.95414884119203	3.3604352451380324	3.2733625	3.2733625	0.14734849999999988
CL1903	1902	3	10535	66.03701945894638	65.86241971997198	65.92674805771365	0.28113567174244625	3.995298486663503	4.013481333333334	3.9305309999999998	0.6005040722073044
CL1904	1903	4	10530	49.762583095916426	49.917393746454536	49.613115257952366	1.076067442371653	27.547239832953462	27.19031075	27.0256695	3.2432890372121768
CL1905	1904	5	10522	59.38984983843376	59.45517132104683	59.40755208333334	0.41835086442289904	52.91546960644365	53.3362968	47.203675	18.67959222192285
CL1906	1905	2	10514	49.02986494198212	54.19480472686656	54.19480472686656	7.2832855282021125	105.91180551845156	62.8502225	62.8502225	60.7228385
CL1907	1906	3	10512	59.04680365296804	58.87967734852204	58.878504672897186	1.5708419621953016	6.940954343702437	6.4443220000000005	3.9115480000000002	4.413170931519044
CL1908	1907	2	10512	54.756468797564686	54.60812040529151	54.60812040529151	0.2121684761327458	4.17021808847032	4.150258	4.150258	0.028546999999999656
CL1909	1908	2	10497	52.55787367819377	51.96279839933766	51.96279839933766	1.5627983993376589	3.2628203637229687	3.2690349999999997	3.2690349999999997	0.01632100000000003
CL1910	1909	4	10494	52.64913283781208	51.90976345588825	51.91544527912346	2.9639268979229056	3.0815944683628738	2.8002154999999997	2.7881555	0.6433328201376407
CL1911	1910	3	10486	56.26549685294679	56.99915413147295	58.78467635402907	4.103738301391868	3.4208560946976925	3.2573570000000003	3.7090660000000004	0.6559102327773214
CL1912	1911	4	10484	36.57001144601297	39.111884467073175	37.97717692743631	6.2592205140690265	14.152286692674553	16.76053675	17.9299855	8.860814118287136
CL1913	1912	3	10480	44.04580152671755	42.358875648148384	43.920044419766796	5.089019081535738	383.1697512056298	428.45897966666666	239.660888	318.0170603583008
CL1914	1913	3	10480	53.21564885496184	53.0214832669839	53.46626478089497	0.8816926688451043	3.9049212596374048	3.8610666666666655	3.6761489999999997	0.2685623876499129
CL1915	1914	3	10475	50.13842482100239	50.7092858037768	50.80763582966225	1.2780134246744868	23.510001897756556	23.154478666666666	23.353995	1.6973524489589331
CL1916	1915	4	10470	48.36676217765043	49.297652331103954	48.95970507634542	3.2519159564093965	354.173224778128	354.7732135	255.95767850000001	292.44495656455564
CL1917	1916	4	10468	54.594956056553315	55.17216712620001	54.113585918869354	2.1771836457471707	3.1895661882881163	3.15318375	3.151132	0.3782846979540509
CL1918	1917	3	10464	56.14487767584098	56.360017136642476	55.60625814863103	3.5963281983586373	3.7571575031536697	3.9338553333333337	3.715012	0.4844855329854774
CL1919	1918	5	10454	53.84541802180984	53.876936337837	53.809844908968316	1.3135602370385833	3.430056184713985	3.4714952	3.380726	0.3224858520080532
CL1920	1919	2	10453	39.041423514780455	38.53434487472803	38.53434487472803	1.993415955046224	2.9474757567205585	2.9750970000000003	2.9750970000000003	0.108584
CL1921	1920	3	10449	60.579959804766006	59.99349494728241	60.78879679908545	1.514872609560998	3.988157675375634	4.192666333333333	4.039558	0.5029854522828886
CL1922	1921	3	10439	42.39869719321774	44.01704618247408	45.115384615384606	3.2098546838621944	228.13449389893668	365.82504533333326	393.56872799999996	283.1458697079682
CL1923	1922	2	10436	56.266768876964356	56.36712056113527	56.36712056113527	0.5403870877232819	3.7731478862591032	3.8161565000000004	3.8161565000000004	0.23159850000000026
CL1924	1923	3	10429	44.49132227442708	44.35189182620431	45.35714285714285	2.1206686015874374	16.943893927126286	16.780719666666666	20.591688	5.685676331118069
CL1925	1924	3	10421	60.79071106419729	61.49157417656753	62.70935960591133	2.463256834674266	67.96036843700222	69.25134866666667	67.461656	8.662875540176767
CL1926	1925	2	10408	46.0511145272867	44.95291799415144	44.95291799415144	1.546688703230295	4.2914850629323595	3.6867075	3.6867075	0.8517625000000002
CL1927	1926	3	10404	55.83429450211458	55.55029715359643	60.27955736750146	6.928397546101872	176.46245025499806	201.417122	229.49033799999998	75.99833254278127
CL1928	1927	4	10400	64.74038461538461	63.998245548321535	63.37737331200464	2.286366696251394	5.550294069230769	5.348596499999999	5.7211859999999986	0.6956143977199221
CL1929	1928	4	10399	47.11991537647851	47.2230956254251	47.38200432936832	0.5951170247456803	4.1457344074430225	4.00202075	3.7614690000000004	0.7812603377355641
CL1930	1929	3	10397	44.11849571991922	43.68778412499649	43.41359773371104	0.49097652635392	650.2076969282485	1683.625271	2307.228719	1180.80224295835
CL1931	1930	2	10387	49.388658900548755	50.02345417774213	50.02345417774213	1.7175354374075342	14.533702238663714	14.857079500000001	14.857079500000001	0.8749465000000001
CL1932	1931	5	10385	63.601348098218594	64.03050397037916	64.8367952522255	1.742073399311694	5.947789637554165	5.704244600000001	5.843319999999999	1.2052381052501784
CL1933	1932	4	10385	37.997111218103036	39.69570115804338	39.29658036733225	5.074194200307941	50.079304567260465	71.17860974999998	28.3641325	74.8103748404911
CL1934	1933	3	10385	52.556571978815604	48.42146475644631	45.889864325618525	4.4421871082364905	911.0385328467984	602.7167503333334	547.927536	364.09201447656545
CL1935	1934	6	10375	55.04578313253012	55.20949326412656	55.41454433435778	2.489435065248376	3.5456190623614456	3.5814118333333336	3.668729	0.8383686955843505
CL1936	1935	5	10355	60.144857556735886	61.27097515124298	60.51873198847262	2.5994049600845344	3.490522009560599	3.3585522	3.458276	0.4066346544648649
CL1937	1936	2	10352	50.87905718701701	50.41003124047546	50.41003124047546	0.5938547698872298	19.210931726429674	17.348873	17.348873	2.3576360000000003
CL1938	1937	2	10348	51.06300734441439	51.0960213472255	51.0960213472255	0.7625645113603632	3.6639493915732495	3.6848120000000004	3.6848120000000004	0.4818889999999998
CL1939	1938	4	10345	61.34364427259546	61.165484787117634	61.33912758196392	0.5767207330164277	4.119553159787337	4.01137675	4.1078325	0.31077544810471663
CL1940	1939	3	10344	61.156225831399844	61.85759203987425	61.717285339332584	1.2450642377930972	6.252687096867749	5.878660666666668	5.685116000000001	0.7525896307817578
CL1941	1940	3	10335	45.224963715529746	46.13496274904109	46.61855670103093	2.9638161318398617	3.1601612819545237	3.3129223333333333	3.3455839999999997	0.4659052019701958
CL1942	1941	4	10331	53.170070661117016	52.00569891884752	52.32263659909646	3.4276380339827366	3.6873722230181007	3.3247695	3.4098370000000005	0.9232915078471968
CL1943	1942	3	10316	47.469949592865454	49.12970563375276	46.37763833428409	4.858164252437189	55.931259723730136	48.16325266666666	49.166004	14.18428460295166
CL1944	1943	4	10290	61.01068999028183	61.59124602537406	61.31904979261347	3.9176806659396832	5.600858077065112	5.966513000000001	5.3224825	2.2016788261268943
CL1945	1944	3	10278	50.87565674255693	50.63934741717268	50.930729325602684	0.4838721290743758	5.567691237594862	5.4903156666666675	5.7001800000000005	0.5040602933607139
CL1946	1945	4	10275	56.389294403892954	56.69369839477604	56.484440365982024	1.915070342112132	3.2264992954744525	3.165093	3.13177	0.2183648565989959
CL1947	1946	4	10267	57.689685399824675	57.26919313629443	57.885813498646094	3.292236413926904	75.88394400915556	65.43628425	71.8400235	25.13570051212088
CL1948	1947	3	10262	49.37633989475736	49.1203517301344	50.00753125470703	1.6515180648634895	16.237496388130968	13.738738333333332	18.204893	7.984961147443376
CL1949	1948	2	10258	38.360304152856315	38.565167189403354	38.565167189403354	0.6827436741064048	5.494080387404953	5.2399535	5.2399535	0.8469244999999996
CL1950	1949	2	10253	45.420852433434106	44.32821195389627	44.32821195389627	4.072280202363341	6.0820722664585976	5.5941395	5.5941395	1.8185295
CL1951	1950	5	10249	38.38423260805932	38.62346967230392	38.38748495788207	2.2167772486877406	58.35374581939702	57.3230818	32.409744	47.5829525509121
CL1952	1951	3	10248	45.46252927400469	45.82055108407317	45.94407210538479	0.8877437761449308	3.77236306420765	3.711355333333333	3.4644760000000003	0.4379889302599121
CL1953	1952	3	10247	57.74372987215771	56.530666746301534	57.162315550510776	3.3388615164270763	127.7403803442959	126.222276	119.954924	30.325843667580433
CL1954	1953	4	10244	53.15306520890277	52.89454755252668	53.16086922060279	1.2729639833645516	3.064688040609137	3.055996	3.048187	0.3113278441434367
CL1955	1954	4	10243	61.41755345113737	61.156077581488134	61.916243129753845	1.4257277559631134	3.705793145367568	3.505898	3.1987095	0.8328004773674786
CL1956	1955	4	10243	56.916918871424386	55.38269038032536	57.649087975050776	4.15551994815312	3.265954023528263	3.3408605	3.3132125	0.453625547858859
CL1957	1956	5	10240	59.609375	58.66963810586376	58.83720930232558	2.993908086769256	3.705530282910156	3.4512468000000003	3.52	0.8349078957454888
CL1958	1957	4	10239	61.80291044047271	61.425730806208385	62.194564639406615	3.531778220937305	5.914246456196895	5.741683999999999	6.157491	1.0254261706690542
CL1959	1958	4	10235	51.30434782608695	51.690081338674844	52.05189507267797	2.4178347497736734	3.292753510893991	3.3415345000000003	3.4512235	0.3019923638244021
CL1960	1959	4	10234	47.391049443033026	47.26733474023374	47.40541020562084	1.2990021008101298	3.8447227041235097	3.679884	3.889889	0.7681648573434612
CL1961	1960	3	10227	56.90818421824582	56.74965724226661	56.71332296526698	0.8268704368048612	3.740663570450768	3.616195	3.609258	0.3486332337925728
CL1962	1961	3	10225	48.63569682151589	48.90490780103672	47.80753733112112	1.9739867779929383	3.377516431393643	3.306592333333333	3.3078809999999996	0.3858373518270216
CL1963	1962	2	10223	52.49926636016825	52.720863498234145	52.720863498234145	4.1414763116046265	3.7272858653037266	3.7544800000000005	3.7544800000000005	0.5082369999999999
CL1964	1963	2	10221	35.81841307112807	35.57512695282972	35.57512695282972	0.46125531721896	28.090898999119453	28.8531105	28.8531105	1.4451055000000004
CL1965	1964	4	10220	60.60665362035225	61.12534742201568	60.93712003600625	2.0606112310265328	4.410245457534247	3.945533	3.5622434999999997	0.6910213252581283
CL1966	1965	4	10219	57.15823466092572	56.98508950405442	58.438197667185364	3.3499919440822317	3.5656489255308736	3.58346175	3.6206635	0.3844421130738507
CL1967	1966	4	10217	61.86747577566801	60.236695433616006	61.67773581060032	5.833762896026927	3.9774106521483796	3.75903325	3.9603	0.5611882091916112
CL1968	1967	3	10210	50.08814887365328	49.83121058377414	49.6617050067659	0.4667765149628981	3.3631638204701275	3.3437376666666663	3.478672	0.3439712928955296
CL1969	1968	4	10206	43.925142073290225	44.825672462477314	45.536893114628896	3.088959355243782	12.5559902382912	14.305066500000002	15.854865	7.9216881907963765
CL1970	1969	4	10201	47.407116949318684	47.55314692423809	47.46913580246914	0.8679630458733576	4.756126675325948	4.8288905	4.921005	0.7700781834588291
CL1971	1970	5	10197	61.214082573305866	61.28164041236413	62.919310970081604	4.42408179250786	5.158264232813572	4.868265200000001	5.505624	1.447360611790497
CL1972	1971	3	10197	52.662547808178886	52.494355994395534	52.769514095480936	0.5725249465046687	3.7709788776110633	3.7741583333333337	3.775793	0.1090353648756016
CL1973	1972	3	10196	57.64025107885447	58.91090446684301	60.17094017094017	2.5924385813373383	3.633549332287172	3.599266333333334	3.685835	0.15153470705052646
CL1974	1973	4	10184	63.05970149253731	63.46128687223539	63.08231428795639	2.554845123317786	3.1867079133935587	3.23538775	3.2583285	0.5059099738117322
CL1975	1974	4	10179	64.93761666175459	65.93189302818924	66.48571677029436	1.4379576766960012	3.2267236826800274	3.17958375	3.3047775	0.5064046161072068
CL1976	1975	4	10177	47.233958926992244	47.51416942591783	47.57668807509546	1.5051587947703773	3.624358005699125	3.63971925	3.5839035000000004	0.1806218578569258
CL1977	1976	3	10173	49.71001671090141	49.99893955467024	49.81539335416075	0.9336486968731752	16.477913910449224	15.151994666666665	17.268749	5.5269927283381595
CL1978	1977	3	10168	54.3174665617624	54.20617843764095	53.32958696262996	2.327626479922872	3.385828603265145	3.3721643333333327	3.083417	0.5090732159269648
CL1979	1978	5	10166	53.13791068266772	53.20652175377155	51.71849427168576	2.7508915703568477	3.22365380523313	3.0349638000000003	2.86382	0.6885686386609254
CL1980	1979	3	10166	50.63938618925831	49.374162231494296	50.55083412023922	3.117538242649522	3.9867401204997055	3.777059333333333	3.720475	0.4814506833133473
CL1981	1980	4	10160	45.39370078740158	45.45977247679697	45.33730332167833	0.8050748302051279	123.6982231753937	124.81944525	106.27389050000001	56.378815709684886
CL1982	1981	4	10158	57.0584760779681	56.8525924326855	56.95974604813287	1.0241640718773024	3.4414548493797987	3.4561275	3.1695005000000003	0.6732472299528979
CL1983	1982	5	10146	65.23753203232799	65.66139526945561	66.94772344013491	2.760111493865823	6.990422777942047	7.0387822	6.840565	0.7393899325317865
CL1984	1983	4	10143	52.6175687666371	53.99563008703338	53.32687863435069	3.9072509471130097	109.23673446268364	138.45162299999998	118.42385549999999	78.35670167714
CL1985	1984	3	10143	46.56413289953662	46.599593965090655	46.89896997589305	0.6485643798738097	4.238441903184462	3.9973666666666654	3.421816	1.065462279687189
CL1986	1985	3	10143	62.9596766242729	63.26137387424723	62.79580385459868	0.8478149666783884	2.7226268058759744	2.713673333333333	2.662562	0.1283348280925937
CL1987	1986	6	10137	58.14343494130414	59.20679099543821	58.58803493111893	6.6778427271139975	2.3155123350103586	2.309693166666667	2.3877405	0.2849733959257815
CL1988	1987	2	10132	42.09435452033161	37.99667934903624	37.99667934903624	5.301027175123192	86.2175295558626	53.204967	53.204967	42.707263
CL1989	1988	4	10127	50.53816530068135	50.54447879395771	50.6451004971389	0.2521002507646837	160.50752366821368	158.70775025	138.953556	50.837656165629205
CL1990	1989	3	10121	52.7813457168264	52.78928970996026	53.019180677243675	0.4279027262251622	3.7293554147811476	3.7093206666666663	3.7455550000000004	0.16803090413439492
CL1991	1990	2	10121	51.625333465072615	51.79318481048927	51.79318481048927	0.2500844202799684	4.20586134779172	3.897695	3.897695	0.4591419999999997
CL1992	1991	2	10121	43.09850805256397	41.048401872415646	41.048401872415646	3.4761475371555264	3.8375991806145637	3.7159480000000005	3.7159480000000005	0.2062710000000001
CL1993	1992	3	10113	54.60298625531494	54.878255486672856	55.06834723948162	1.9844629547440902	3.6918752843864335	3.578882333333333	3.465353	0.2646809888077008
CL1994	1993	2	10110	50.33630069238379	49.221055334668854	49.221055334668854	3.9395983810264816	75.03878355430267	60.172968999999995	60.172968999999995	52.513412
CL1995	1994	3	10097	44.973754580568496	45.00785079045721	45.03904455672944	0.1249296411174848	176.25668864989598	171.35401366666662	179.78313500000002	13.08853925821748
CL1996	1995	3	10096	42.997226624405705	42.63270567698682	44.06601123595507	2.3051366747911763	3.577759651842314	3.5467836666666663	3.689885	0.28146895561480473
CL1997	1996	4	10090	64.3607532210109	64.83659039118443	64.83235841814033	1.2068556794230898	2.6679372582755203	2.8093775	2.6427970000000003	0.5357832060201682
CL1998	1997	4	10082	61.3568736361833	61.6862174155545	61.15900263794904	1.3964728793401868	4.534635890993852	4.603276999999999	4.6088335	0.2325845418197435
CL1999	1998	4	10075	48.93300248138958	49.323708800841025	49.07189372164922	1.6947829356082782	3.0074079923573205	2.90423175	2.9159555	0.5015546042458264
[truncated: 2,841 more rows]
